# Supplementary material for: Net-zero transition of the global chemical industry with CO2-feedstock by 2050: feasible yet challenging
Source: Royal Society of Chemistry journal article supplement (doi:10.1039/d2gc03047k), 2022-11-30
Supplement: d2gc03047k1.pdf [file d2gc03047k1.pdf]

## Supplementary Information for

# Net-zero transition of the global chemical industry with CO<sub>2</sub>-feedstock by 2050: feasible yet challenging

Jing Huo,<sup>\*a,b</sup> Zhanyun Wang,<sup>a,b,c</sup> Christopher Oberschelp,<sup>a,b</sup> Gonzalo Guillén-Gosálbez<sup>b,d</sup> and Stefanie Hellweg<sup>a,b</sup>

### Author Information:

<sup>a</sup> Chair of Ecological Systems Design, Institute of Environmental Engineering, ETH Zürich, John-von-Neumann-Weg 9, 8093, Zürich, Switzerland. E-mail: [jhuo@ethz.ch](mailto:jhuo@ethz.ch)

<sup>b</sup> National Centre of Competence in Research (NCCR) Catalysis, ETH Zürich, Zürich, Switzerland

<sup>c</sup> Empa-Swiss Federal Laboratories for Materials Science and Technology, Technology and Society Laboratory, Lerchenfeldstrasse 5, CH-9014 St. Gallen, Switzerland

<sup>d</sup> Sustainable Process Systems Engineering Lab, Department of Chemistry and Applied Biosciences, ETH Zürich, Vladimir-Prelog-Weg 1, 8093, Zürich, Switzerland

Correspondence and requests for materials should be addressed to Jing Huo: [jhuo@ethz.ch](mailto:jhuo@ethz.ch)

## Table of Contents

|                                                                                                                                          |           |
|------------------------------------------------------------------------------------------------------------------------------------------|-----------|
| <b>Table of Contents.....</b>                                                                                                            | <b>2</b>  |
| <b>S0 Definitions and abbreviations .....</b>                                                                                            | <b>4</b>  |
| S0.1 Countries and regions .....                                                                                                         | 4         |
| S0.2 Organizations and projects.....                                                                                                     | 4         |
| S0.3 Scenarios defined by IEA .....                                                                                                      | 5         |
| S0.4 Units.....                                                                                                                          | 5         |
| S0.5 Other abbreviations.....                                                                                                            | 5         |
| <b>S1 Supporting details on methods.....</b>                                                                                             | <b>7</b>  |
| S1.1 CO <sub>2</sub> supply from power and industrial sectors .....                                                                      | 7         |
| S1.1.1 CO <sub>2</sub> emission scenarios from power plants .....                                                                        | 7         |
| S1.1.2 CO <sub>2</sub> emission scenarios from steel mills.....                                                                          | 12        |
| S1.1.3 CO <sub>2</sub> emission scenarios from cement kilns.....                                                                         | 16        |
| S1.1.4 CO <sub>2</sub> emission scenarios from kraft pulp mills .....                                                                    | 20        |
| S1.2 CO <sub>2</sub> -feedstock demand from the chemical industry .....                                                                  | 22        |
| S1.2.1 Production volumes of seven primary chemicals in 2050 .....                                                                       | 22        |
| S1.2.2 CO <sub>2</sub> -based production routes .....                                                                                    | 27        |
| S1.2.3 Quantifying CO <sub>2</sub> -feedstock demand in the chemical industry in 2050 .....                                              | 28        |
| S1.3 Environmental impacts of carbon capture .....                                                                                       | 30        |
| S1.3.1 Energy need for capturing 1 kg CO <sub>2</sub> from different industries.....                                                     | 30        |
| S1.3.2 Environmental impacts of the electricity grid mix.....                                                                            | 32        |
| S1.3.3 Environmental impacts of steam production.....                                                                                    | 41        |
| S1.4 Bottom-up case studies: development and application of CO <sub>2</sub> -feedstock sourcing strategies in China and Middle East..... | 42        |
| S1.4.1 Locations and capacities of individual CO <sub>2</sub> suppliers and consumers.....                                               | 42        |
| S1.4.2 Elimination strategy of coal-fired power plants in China and natural gas-fired power plants in Middle East.....                   | 43        |
| S1.4.3 Environmental impacts of truck transportation.....                                                                                | 44        |
| S1.4.4 Environmental impacts of pipeline transportation .....                                                                            | 44        |
| <b>S2 Additional results .....</b>                                                                                                       | <b>45</b> |
| S2.1 Environmental impacts of carbon capture – sensitivity analysis .....                                                                | 45        |
| S2.2 Bottom-up case studies: optimization of CO <sub>2</sub> supply to chemical manufacturing sites in China.....                        | 49        |
| S2.2.1 Basic scenario.....                                                                                                               | 49        |

|                   |                                                                                                                |           |
|-------------------|----------------------------------------------------------------------------------------------------------------|-----------|
| S2.2.2            | Sensitivity analysis 1: CO <sub>2</sub> transportation with pipelines.....                                     | 50        |
| S2.2.3            | Sensitivity analysis 2: solid biomass-fired power plants included as potential CO <sub>2</sub> suppliers ..... | 52        |
| <b>References</b> | .....                                                                                                          | <b>54</b> |

## S0 Definitions and abbreviations

### S0.1 Countries and regions

Table S1 Region abbreviations

| Region abbreviation | Region                              |
|---------------------|-------------------------------------|
| CN                  | China                               |
| EU                  | European Union (EU28, see Table S2) |
| IN                  | India                               |
| JP                  | Japan                               |
| KR                  | Republic of Korea                   |
| RAF                 | Region Africa                       |
| RME                 | Region Middle East                  |
| RU                  | Russian Federations                 |
| US                  | United States of America            |
| RoW                 | Rest of the World                   |
| GLO                 | Global                              |

Table S2 Region definitions

| Region name              | Included countries                                                                                                                                                                                                                                                                                                                                                                                                                                                                                                                                                                                                               |
|--------------------------|----------------------------------------------------------------------------------------------------------------------------------------------------------------------------------------------------------------------------------------------------------------------------------------------------------------------------------------------------------------------------------------------------------------------------------------------------------------------------------------------------------------------------------------------------------------------------------------------------------------------------------|
| European Union (EU)      | Austria, Belgium, Bulgaria, Croatia, Cyprus, Czechia, Denmark, Estonia, Finland, France, Germany, Greece, Hungary, Ireland, Italy, Latvia, Lithuania, Luxembourg, Malta, Netherlands, Poland, Portugal, Romania, Slovakia, Slovenia, Spain, Sweden, United Kingdom of Great Britain and Northern Ireland                                                                                                                                                                                                                                                                                                                         |
| Region Africa (RAF)      | Algeria, Angola, Benin, Botswana, Burkina Faso, Burundi, Cabo Verde, Cameroon, Central African Republic, Chad, Comoros, Congo, Côte d'Ivoire, Democratic Republic of the Congo, Djibouti, Egypt, Equatorial Guinea, Eritrea, Eswatini, Ethiopia, Gabon, Gambia (Republic of the), Ghana, Guinea, Guinea Bissau, Kenya, Lesotho, Liberia, Libya, Madagascar, Malawi, Mali, Mauritania, Mauritius, Morocco, Mozambique, Namibia, Niger, Nigeria, Rwanda, Sao Tome and Principe, Senegal, Seychelles, Sierra Leone, Somalia, South Africa, South Sudan, Sudan, Togo, Tunisia, Uganda, United Republic of Tanzania, Zambia, Zimbabwe |
| Region Middle East (RME) | Bahrain, Iran (Islamic Republic of), Iraq, Jordan, Kuwait, Lebanon, Oman, Qatar, Saudi Arabia, Syrian Arab Republic, United Arab Emirates, Yemen                                                                                                                                                                                                                                                                                                                                                                                                                                                                                 |

### S0.2 Organizations and projects

Table S3 Organization and project abbreviations

| Abbreviation | Organizations/Projects                                       |
|--------------|--------------------------------------------------------------|
| FAO          | Food and Agriculture Organization of the United Nations      |
| IEA          | The International Energy Agency                              |
| IEAGHG       | The International Energy Agency Greenhouse Gas R&D Programme |
| IPCC         | The Intergovernmental Panel on Climate Change                |
| JRC          | Joint Research Center of the European Union                  |
| USGS         | U.S. Geological Survey                                       |

### S0.3 Scenarios defined by IEA

In this study, we refer to the following scenarios (Table S4) defined by IEA in their various reports.

Table S4 IEA scenarios abbreviations

| Scenario abbreviation | Scenario                            | Appeared in                                                                                                                                             |
|-----------------------|-------------------------------------|---------------------------------------------------------------------------------------------------------------------------------------------------------|
| 2DS                   | 2 Degree Scenario                   | <i>Cement Technology Roadmap</i> <sup>1</sup>                                                                                                           |
| STEPS                 | Stated Policies Scenario            | <i>Iron and Steel Technology Roadmap</i> <sup>2</sup><br><i>World Energy Outlook 2020</i> <sup>3</sup><br><i>World Energy Outlook 2021</i> <sup>4</sup> |
| SDS                   | Sustainable Development Scenario    | <i>Iron and Steel Technology Roadmap</i> <sup>2</sup><br><i>World Energy Outlook 2020</i> <sup>3</sup><br><i>World Energy Outlook 2021</i> <sup>4</sup> |
| NZE                   | Net Zero Emissions by 2050 Scenario | <i>Net Zero Emission Roadmap 2050</i> <sup>5</sup><br><i>World Energy Outlook 2021</i> <sup>4</sup>                                                     |

### S0.4 Units

Table S5 Unit abbreviations

| Unit abbreviation | Unit                           |
|-------------------|--------------------------------|
| kg                | kilogram                       |
| Mt                | Megatonne                      |
| Gt                | Gigatonne                      |
| km                | kilometer                      |
| MJ                | Megajoule                      |
| TJ                | Terajoule                      |
| kWh               | kilowatt-hour                  |
| GWh               | Gigawatt-hour                  |
| TWh               | Terawatt-hour                  |
| MW                | Megawatt                       |
| GW                | Gigawatt                       |
| DALY              | Disability-Adjusted Life Years |

### S0.5 Other abbreviations

Table S6 Other abbreviations appeared in this study

| Abbreviation | Meaning                                                     |
|--------------|-------------------------------------------------------------|
| BAT          | Best-Available Technology                                   |
| BF-BOF       | Blast Furnace-Basic Oxygen Furnace (steel production route) |
| BTX          | Benzene, Toluene, Xylene                                    |
| CCS          | Carbon Capture and Storage                                  |
| CCU          | Carbon Capture and Utilization                              |

---

|                 |                                                                                    |
|-----------------|------------------------------------------------------------------------------------|
| CCUS            | Carbon Capture, Utilization and Storage                                            |
| CHP             | Combined Heat and Power                                                            |
| CO <sub>2</sub> | Carbon Dioxide                                                                     |
| DRI-EAF         | Direct Reducing Iron-Electric Arc Furnace (steel production route)                 |
| EMO             | Environmental Merit Order                                                          |
| GDP             | Gross Domestic Product                                                             |
| GFPMX           | Global Forest Products Model                                                       |
| GHG             | Greenhouse gas                                                                     |
| GWP             | Global Warming Potential                                                           |
| HVC             | High Value Chemicals, including ethylene, propylene, benzene, toluene, and xylenes |
| LCA             | Life Cycle Assessment                                                              |
| MEA             | Monoethanolamine                                                                   |
| MTA             | Methanol-To-Aromatics                                                              |
| MTO             | Methanol-To-Olefins                                                                |
| NH <sub>3</sub> | Ammonia                                                                            |
| NO <sub>x</sub> | Nitrogen oxides                                                                    |
| PM              | Particulate matter                                                                 |
| SO <sub>2</sub> | Sulfur dioxide                                                                     |
| SR-BOF          | Smelting Reduction-Basic Oxygen Furnace (steel production route)                   |
| TRL             | Technology Readiness Level                                                         |

---

# S1 Supporting details on methods

## S1.1 CO<sub>2</sub> supply from power and industrial sectors

CO<sub>2</sub> were assumed to be supplied from power, steel, cement, and pulp sectors in 2050. Table S7 summarizes the key parameters affecting CO<sub>2</sub> emissions from each sector and lists the corresponding tables and paragraphs within this ESI for more detailed descriptions.

Table S7 Parameters affecting CO<sub>2</sub> emissions, by sector

| Sectors | Suppliers                                                  | Parameters                                                         | Location in this ESI            |
|---------|------------------------------------------------------------|--------------------------------------------------------------------|---------------------------------|
| Power   | Coal-, natural gas-, solid biomass-fired power plants      | Power generation amount                                            | Table S15, Section S1.1.1.1     |
|         |                                                            | Net electrical efficiency                                          | Table S12, Table S13            |
|         |                                                            | CO <sub>2</sub> emission factors of fuel combustion                | Table S14                       |
| Steel   | Integrated steel mills with BF-BOF, DRI-EAF, SR-BOF routes | Steel production volume                                            | Table S22, Section S1.1.2.1     |
|         |                                                            | Specific CO <sub>2</sub> emission factors of each production route | Table S18, Table S19, Section 0 |
| Cement  | Cement kilns                                               | Cement production volume                                           | Table S28, Section S1.1.3.1     |
|         |                                                            | Clinker factor                                                     | Table S25, Section S1.1.3.2     |
|         |                                                            | Thermal energy consumption                                         | Table S26, Section S1.1.3.2     |
|         |                                                            | Fuel mix                                                           | Table S27                       |
|         |                                                            | CO <sub>2</sub> emission factors of fuel combustion                | Table S14                       |
| Pulp    | Kraft pulp mills                                           | Kraft pulp production volume                                       | Table S30, Section S1.1.4.1     |
|         |                                                            | Specific biogenic CO <sub>2</sub> emission factors                 | Section S1.1.4.2                |
|         |                                                            | Thermal energy consumption of lime kilns                           | Section S1.1.4.2                |
|         |                                                            | Fuel mix of lime kilns                                             | Table S27                       |
|         |                                                            | CO <sub>2</sub> emission factors of fuel combustion                | Table S14                       |

### S1.1.1 CO<sub>2</sub> emission scenarios from power plants

#### S1.1.1.1 Projection of electricity generation amount

IEA's *World Energy Outlook 2021*<sup>4</sup> projected global and regional electricity generation by fuel type in 2050 under different scenarios. In this study, IEA's projections under the Stated Policies Scenario (STEPS) were used for the high-emission scenario, and the low-emission scenario was set to align with IEA's Net Zero Emissions by 2050 Scenario (NZE).

However, only global projections are freely available for NZE, while for regional electricity generation, Sustainable Development Scenario (SDS) represents the most ambitious scenario with data that are freely available. Therefore, regional electricity generation with each fuel type (except biomass-fired and hydro electricity generation) under NZE was obtained by multiplying those under SDS with an extrapolating ratio as calculated in Table S8.

Table S8 Extrapolating ratio converting regional electricity generation under SDS to regional electricity generation under NZE

| Type  | A: Global generation in 2050 (NZE) (TWh) | B: Global generation in 2050 (SDS) (TWh) | Extrapolating ratio (A/B) |
|-------|------------------------------------------|------------------------------------------|---------------------------|
| Total | 71164                                    | 57950                                    | 1.23                      |
| Coal  | 663                                      | 1088                                     | 0.61                      |

|             |       |       |      |
|-------------|-------|-------|------|
| Oil         | 6     | 119   | 0.05 |
| Natural gas | 922   | 2755  | 0.33 |
| Nuclear     | 5497  | 4714  | 1.17 |
| Wind        | 24785 | 17577 | 1.41 |
| Solar PV    | 23469 | 17433 | 1.35 |

For biomass-fired and hydro electricity generation, only global projection data are freely available in IEA’s *World Energy Outlook 2021*. However, regional projections till 2040 were reported in an earlier version, i.e., IEA’s *World Energy Outlook 2020*<sup>3</sup> under the STEPs and SDS scenarios. In this study, these values in 2040 were multiplied by the corresponding extrapolating ratio (specified in Table S9) to estimate regional projections of biomass-fired and hydro electricity generation in 2050, under high- and low-emission scenarios.

Table S9 Extrapolating ratio converting regional biomass-fired and hydro electricity generation projections from 2040 to 2050

|         | High-emission scenario                                  |                                                         |                           | Low-emission scenario                                 |                                                       |                           |
|---------|---------------------------------------------------------|---------------------------------------------------------|---------------------------|-------------------------------------------------------|-------------------------------------------------------|---------------------------|
|         | A: Global generation in 2050 (STEPS) <sup>4</sup> (TWh) | B: Global generation in 2040 (STEPS) <sup>3</sup> (TWh) | Extrapolating ratio (A/B) | A: Global generation in 2050 (NZE) <sup>4</sup> (TWh) | B: Global generation in 2040 (SDS) <sup>3</sup> (TWh) | Extrapolating ratio (A/B) |
| Biomass | 1852                                                    | 1410                                                    | 1.31                      | 4121                                                  | 2155                                                  | 1.91                      |
| Hydro   | 6739                                                    | 5919                                                    | 1.14                      | 8461                                                  | 6690                                                  | 1.26                      |

For the Republic of Korea, since no data from IEA are freely available, the Current Policy Scenario and Net Zero 2050 Scenario from a Korea-focused study<sup>6</sup> were used instead for the high- and low-emission scenarios, respectively.

Biomass used in power plants is further divided into solid and liquid biofuels, and biogases. Regional electricity generation from the three fuel types in “main activity producer electricity plants” and “main activity producer CHP plants” in 2019 was reported in the “*Extended World Energy Balances*” in IEA’s *World Energy Statistics and Balances* (CHP stands for combined heat and power).<sup>7</sup> The relative shares of the three biomass types were assumed to be the same in 2050 in all regions. If the regions have no biomass-fueled main activity producer electricity plants or CHP plants in 2019 according to IEA (China and Russian Federation), the global average share was used instead (Table S10).

Table S10 Share of electricity generation from the three biomass types, by region

| Region | Solid biofuels                  | Liquid biofuels | Biogases |
|--------|---------------------------------|-----------------|----------|
| CN     | No data, use the global average |                 |          |
| EU     | 58%                             | 4%              | 38%      |
| IN     | 0%                              | 0%              | 100%     |
| JP     | 98%                             | 0%              | 2%       |
| KR     | 64%                             | 30%             | 6%       |
| RAF    | 95%                             | 0%              | 5%       |
| RME    | 0%                              | 0%              | 100%     |
| RU     | No data, use the global average |                 |          |
| US     | 56%                             | 0%              | 44%      |



|     |     |     |     |
|-----|-----|-----|-----|
| RoW | 57% | 14% | 28% |
| GLO | 61% | 5%  | 34% |

### SI.1.1.2 Specific carbon intensity

Three types of power plants were considered in this study as potential CO<sub>2</sub> suppliers: coal-, natural gas-, and solid biomass-fueled power plants.

- Oil-fueled electricity generation (including liquid biofuel) represents 3.0% of global electricity generation in 2019, and this value is projected to decrease to 1.0% and 0.3% under high- and low-emission scenarios, respectively.<sup>4</sup> Therefore, fossil oil and liquid biofuel power plants were excluded from this study.
- Biogas-fueled power plants were also excluded because the maximum unit size of a biogas-fired gas turbine is only 15 Megawatt (MW).<sup>8</sup> The maximum annual CO<sub>2</sub> emissions from one unit is less than 0.06 Mt, assuming it runs at full capacity with current global average efficiency, which is smaller than 0.1 Mt CO<sub>2</sub>/year emissions – the cut-off value of large point source emitters where carbon capture projects become economically appealing.<sup>9</sup>

Specific carbon intensity of electricity generation in one region/country depends on the net electrical efficiency there and the carbon intensity of corresponding fuels. The latest regional net electrical efficiencies were derived from the “*Extended World Energy Balances*” in IEA’s *World Energy Statistics and Balances* for the year 2019.<sup>7</sup> The first step is to group the fuel products into fuel types (Table S11). Then, the fuel efficiency  $\eta$  per fuel type was calculated with the total regional fuel inputs ( $\sum FI$ , in TJ), electricity outputs ( $\sum EO$ , in GWh), and heat outputs ( $\sum HO$ , in TJ) in the case of combined heat and power (CHP) plants (Eqn(1)). Only “main activity producer electricity plants” and “main activity producer CHP plants” flows in the dataset were considered. The derived regional fuel-to-power efficiencies in 2019 are shown in Table S12.

$$\eta = \frac{3.6 \times \sum EO + \sum HO}{\sum FI} \quad (1)$$

Table S11 Products by fuel type (coal, natural gas, and solid biomass)

| Fuel type     | Products as in Extended World Energy Balances <sup>7</sup>                                                                                                      |
|---------------|-----------------------------------------------------------------------------------------------------------------------------------------------------------------|
| Coal          | anthracite, coking coal, other bituminous coal, sub-bituminous coal, lignite, BKB, oil shale and oil sands, petroleum coke, coke oven coke, peat, peat products |
| Natural gas   | natural gas                                                                                                                                                     |
| Solid biomass | primary solid biofuels                                                                                                                                          |

Table S12 Net electrical efficiency in 2019, by fuel type and region

| Region | Fuel efficiency |          |                     |                 |                       |                   |
|--------|-----------------|----------|---------------------|-----------------|-----------------------|-------------------|
|        | Coal non-CHP    | Coal CHP | Natural gas non-CHP | Natural gas CHP | Solid biomass non-CHP | Solid biomass CHP |
| CN     | 39%             | 49%      | 56%                 | 84%             |                       |                   |

|     |     |     |     |     |     |     |
|-----|-----|-----|-----|-----|-----|-----|
| EU  | 38% | 55% | 53% | 74% | 38% | 73% |
| IN  | 35% |     | 41% |     |     |     |
| JP  | 41% |     | 52% |     | 38% |     |
| KR  | 39% |     | 53% | 70% | 38% | 75% |
| RAF | 32% |     | 40% |     | 20% |     |
| RME | 37% |     | 41% |     |     |     |
| RU  |     | 55% |     | 62% |     |     |
| US  | 37% | 49% | 50% | 73% | 25% | 79% |
| RoW | 35% | 62% | 47% | 51% | 24% | 23% |
| GLO | 37% | 50% | 47% | 65% | 33% | 70% |

The efficiency will keep improving for main activity electricity / CHP producers. For the high-emission scenario, it was assumed that by 2050, the average electrical efficiency would improve by 15% from the level in 2019 in all regions (see main text for details), but not exceeding the best available technology (BAT) level identified by the Joint Research Center (JRC) of the European Union (Table S13).<sup>8</sup> For the low-emission scenario, all the combustion power plants in 2050 were set to operate with the efficiencies that corresponds to the BAT level. For CHPs, the BAT fuel efficiency depends on how much heat is generated. We assumed in 2050 the ratio of regional heat output to regional electricity output would remain the same as in 2019. The regional fuel efficiency for CHP plants was then calculated by interpolating the BAT fuel efficiency at 0% heat output (Table S13) and 90% at 100% heat output. For locations with no biomass-fired power plants in 2019, the projected global average efficiency for 2050 was used instead.

Table S13 BAT net electrical efficiency for main activity electricity producers, by fuel type

| Fuel type     | BAT net electrical efficiency | Scenario                                            |
|---------------|-------------------------------|-----------------------------------------------------|
| Coal          | 46%                           | Coal-fired, $\geq 1000$ MW <sub>th</sub> , new unit |
| Gas           | 60.5%                         | CCGT, $\geq 600$ MW <sub>th</sub> , new unit        |
| Solid biomass | 38%                           | New unit                                            |

With electricity generation projections ( $P_{power}$ ) by each fuel type ( $l$ ) (TWh/year), the corresponding estimated fuel efficiency ( $\eta_l$ , %), and the default emission factors ( $EF_{fuel,l}$ , in tonne CO<sub>2</sub>/TJ fuel) for each fuel product,<sup>10</sup> we then calculated the regional CO<sub>2</sub> emissions from each type of power plants ( $E_{CO_2,power\ plants,i}$ , Mt/year) under the two scenarios (Eqn (2)).

$$E_{CO_2,power\ plants,i} = \frac{3.6P_{power,l} \times EF_{fuel,l}}{1000\eta_l} \quad (2)$$

The default CO<sub>2</sub> emission factors by fuel type derived from the *IPCC Guidelines for National Greenhouse Gas Inventories*<sup>10</sup> were summarized in Table S14. It was assumed that these values stay the same across all scenarios. Specifically, since there are different products under the fuel type of coal with different emission factors, weighted regional average emission factors were calculated with the amount of each product input into the “main activity producer electricity plants” and “main activity producer CHP plants”.

Table S14 Default CO<sub>2</sub> emission factors, by fuel type and region

|     | Coal (tonne CO <sub>2</sub> /TJ) | Natural gas (tonne CO <sub>2</sub> /TJ) | Solid biomass (tonne CO <sub>2</sub> /TJ) |
|-----|----------------------------------|-----------------------------------------|-------------------------------------------|
| CN  | 94.6                             |                                         |                                           |
| EU  | 98.2                             |                                         |                                           |
| IN  | 95.1                             |                                         |                                           |
| JP  | 94.7                             |                                         |                                           |
| KR  | 94.8                             |                                         |                                           |
| RAF | 94.6                             | 56.1                                    | 100                                       |
| RME | 95.3                             |                                         |                                           |
| RU  | 97.3                             |                                         |                                           |
| US  | 95.9                             |                                         |                                           |
| RoW | 96.4                             |                                         |                                           |
| GLO | 95.3                             |                                         |                                           |

The regionalized projection of electricity generation by fuel type and the corresponding CO<sub>2</sub> emissions under the high- and low-emission scenarios are summarized in Table S15.

Table S15 Regionalized projection of electricity generation and the corresponding CO<sub>2</sub> emissions under high- and low-emission scenarios, by fuel type and region

| Fuel        | Region | High-emission scenario            |                                     | Low-emission scenario             |                                     |
|-------------|--------|-----------------------------------|-------------------------------------|-----------------------------------|-------------------------------------|
|             |        | Electricity generation (TWh/year) | CO <sub>2</sub> emissions (Mt/year) | Electricity generation (TWh/year) | CO <sub>2</sub> emissions (Mt/year) |
| Coal        | CN     | 3349                              | 2874                                | 449                               | 358                                 |
|             | EU     | 15                                | 13                                  | 12                                | 10                                  |
|             | IN     | 947                               | 805                                 | 67                                | 50                                  |
|             | JP     | 65                                | 48                                  | 31                                | 23                                  |
|             | KR     | 0                                 | 0                                   | 0                                 | 0                                   |
|             | RAF    | 175                               | 160                                 | 19                                | 14                                  |
|             | RME    | 29                                | 24                                  | 4                                 | 3                                   |
|             | RU     | 127                               | 122                                 | 0                                 | 0                                   |
|             | US     | 55                                | 45                                  | 31                                | 23                                  |
|             | RoW    | 1530                              | 1372                                | 50                                | 40                                  |
|             | GLO    | 6293                              | 5463                                | 663                               | 520                                 |
| Natural gas | CN     | 539                               | 272                                 | 232                               | 117                                 |
|             | EU     | 356                               | 137                                 | 14                                | 5                                   |
|             | IN     | 172                               | 74                                  | 41                                | 14                                  |
|             | JP     | 139                               | 48                                  | 34                                | 11                                  |
|             | KR     | 228                               | 83                                  | 128                               | 47                                  |
|             | RAF    | 705                               | 307                                 | 69                                | 23                                  |
|             | RME    | 1574                              | 678                                 | 124                               | 41                                  |
|             | RU     | 653                               | 399                                 | 77                                | 44                                  |
|             | US     | 1555                              | 562                                 | 59                                | 20                                  |
|             | RoW    | 2511                              | 961                                 | 133                               | 46                                  |
|             | GLO    | 8432                              | 3520                                | 909                               | 368                                 |

|               |     |      |      |      |      |
|---------------|-----|------|------|------|------|
|               | CN  | 311  | 362  | 630  | 734  |
|               | EU  | 188  | 235  | 357  | 447  |
|               | IN  | 0    | 0    | 0    | 0    |
|               | JP  | 91   | 86   | 135  | 128  |
| Solid biomass | KR  | 24   | 23   | 45   | 42   |
|               | RAF | 50   | 55   | 113  | 132  |
|               | RME | 0    | 0    | 0    | 0    |
|               | RU  | 27   | 31   | 143  | 167  |
|               | US  | 78   | 110  | 252  | 296  |
|               | RoW | 354  | 544  | 825  | 833  |
|               | GLO | 1123 | 1447 | 2499 | 2779 |

## S1.1.2 CO<sub>2</sub> emission scenarios from steel mills

### S1.1.2.1 Projection of crude steel production volume

The regional production volumes of crude steel in 2019 by routes was summarized in the *Steel Statistical Yearbook 2020 concise version*.<sup>11</sup>

For the high-emission scenario in 2050, the annual growth rate of global and regional crude steel production projections was set according to the IEA's Stated Policy Scenario (STEPS) (see Table S16 for details).<sup>2, 12</sup>

Table S16 Crude steel production annual growth, from 2019 to 2050 under the high-emission scenario, by region

| Region | Annual growth | Data source | Note                                                 |
|--------|---------------|-------------|------------------------------------------------------|
| CN     | -0.4%         | 2           |                                                      |
| EU     | 0.2%          | 2           |                                                      |
| IN     | 8.8%          | 2           |                                                      |
| JP     | -0.3%         | 12          | projection for "Developed Asia and Oceania" as proxy |
| KR     | -0.3%         | 12          | projection for "Developed Asia and Oceania" as proxy |
| RAF    | 41.3%         | 12          |                                                      |
| RME    | 3.7%          | 2           |                                                      |
| RU     | 0.2%          | 2           | the same growth rate as EU was assumed               |
| US     | 0.8%          | 2           |                                                      |
| GLO    | 1.3%          | 2           |                                                      |

The low-emission scenario was set to be 1.5°C pathways-compliant, under which more ambitious decarbonization measures are required in comparison to IEA's Sustainable Development Scenario (SDS), as researchers pointed out that the sector's greenhouse gas (GHG) budget till 2050 for keeping the temperature increase within 1.5°C will be exhausted by 2038 under SDS.<sup>12</sup> Therefore, for the low-emission scenario, the demand for crude steel was set to decrease by 10% relative to that in the SDS assuming a better material efficiency. The annual growth rates of crude steel production by region are shown in Table S17.

Table S17 Crude steel production annual growth, from 2019 to 2050 under the low-emission scenario, by region

| Region | Annual growth | Data source | Note                                   |
|--------|---------------|-------------|----------------------------------------|
| CN     | -1.1%         |             |                                        |
| EU     | -0.8%         |             |                                        |
| IN     | 4.3%          |             |                                        |
| JP     | -0.8%         |             | the same growth rate as EU was assumed |
| KR     | -0.8%         | 2           | the same growth rate as EU was assumed |
| RAF    | 8.4%          |             |                                        |
| RME    | 1.7%          |             |                                        |
| RU     | -0.8%         |             | the same growth rate as EU was assumed |
| US     | 0.0%          |             |                                        |
| GLO    | 0.1%          |             |                                        |

### S1.1.2.2 Specific carbon intensity

CO<sub>2</sub> emissions from the steel sector come predominantly from three production routes, namely the blast furnace-basic oxygen furnace (BF-BOF) route, direct reduced iron-electric arc furnace (DRI-EAF) route, and the new smelting reduction-basic oxygen furnace (SR-BOF) route that was set to commercialize under the low-emission scenario in 2050.

For secondary steel making, CO<sub>2</sub> emissions come predominantly from power plants, which were addressed separately in Section S1.1.1. The regionalized baseline CO<sub>2</sub> intensities of the BF-BOF route in 2019 were summarized in Table S18. Due to data constraint, CO<sub>2</sub> intensities of the DRI-EAF and SR-BOF route reported by Material Economics (1.1 and 1.5 tonnes CO<sub>2</sub> per tonne steel, respectively)<sup>13</sup> were used in all regions as baseline.

Table S18 Specific CO<sub>2</sub> emission factors of the BF-BOF route, by region

| Region | Specific CO <sub>2</sub> emission factors (tonne CO <sub>2</sub> /tonne steel) | Data source | Note                                                                                                                                                                                           |
|--------|--------------------------------------------------------------------------------|-------------|------------------------------------------------------------------------------------------------------------------------------------------------------------------------------------------------|
| CN     | 2.36                                                                           | 14          |                                                                                                                                                                                                |
| EU     | 1.90                                                                           | 14          | Weighted average of European countries included in the study (Spain, France, Germany, Italy, and Poland)                                                                                       |
| IN     | 2.79                                                                           | 14          |                                                                                                                                                                                                |
| JP     | 1.92                                                                           | 14          |                                                                                                                                                                                                |
| KR     | 2.34                                                                           | 14          |                                                                                                                                                                                                |
| RAF    | 2.24                                                                           | 14          | Global average was used as proxy                                                                                                                                                               |
| RME    | 2.24                                                                           | 14          | Global average was used as proxy                                                                                                                                                               |
| RU     | 1.84                                                                           | 14          |                                                                                                                                                                                                |
| US     | 1.83                                                                           | 14          |                                                                                                                                                                                                |
| GLO    | 2.24                                                                           | 14          | Weighted average of all countries included in the study (Canada, Spain, Mexico, United States, France, Russia, Japan, Germany, Italy, Brazil, Turkey, Republic of Korea, China, India, Poland) |

Specific CO<sub>2</sub> emission factors of each production route was set to decrease by 15% under the high-emission scenario in 2050 as a result of energy efficiency improvement (see main text), as long as it is larger than the specific CO<sub>2</sub> emission factors with BAT (Table S19). Under the

low-emission scenario, we assumed that the specific CO<sub>2</sub> emission factors of all three routes would match BAT.

Table S19 Specific CO<sub>2</sub> emission factors of BAT steel production, by route

| Production route      | Specific CO <sub>2</sub> emission factors (tonne CO <sub>2</sub> /tonne steel) | Data source | Note                                                                  |
|-----------------------|--------------------------------------------------------------------------------|-------------|-----------------------------------------------------------------------|
| BF-BOF                | 1.60                                                                           | 14          |                                                                       |
| DRI-EAF (natural gas) | 0.84                                                                           | 15          |                                                                       |
| SR-BOF                | 1.28                                                                           |             | The emission factor of SR-BOF is 20% lower than BF-BOF. <sup>14</sup> |

The share of each production route is another key factor affecting regional specific carbon intensities. For the high-emission scenario, we assumed that the share of regional production routes follows the stated policies scenario (STEPS) set by IEA.<sup>2</sup> For countries without detailed analysis, we assumed that Japan and Republic of Korea would follow similar production routes as EU, and Russia would follow that of the China.

Table S20 Share of different primary steel production routes under the high-emission scenario in 2050, by region, adapted from IEA<sup>2</sup>

| Region | BF-BOF | SR-BOF | DRI-EAF (natural gas) | Other low-carbon routes | Secondary steelmaking | Note                       |
|--------|--------|--------|-----------------------|-------------------------|-----------------------|----------------------------|
| CN     | 55%    | 0%     | 0%                    | 0%                      | 45%                   |                            |
| EU     | 44%    | 0%     | 2%                    | 0%                      | 54%                   |                            |
| IN     | 55%    | 0%     | 20%                   | 0%                      | 25%                   |                            |
| JP     | 44%    | 0%     | 2%                    | 0%                      | 54%                   | Same mix as EU was assumed |
| KR     | 44%    | 0%     | 2%                    | 0%                      | 54%                   | Same mix as EU was assumed |
| RAF    | 43%    | 0%     | 39%                   | 0%                      | 18%                   |                            |
| RME    | 3%     | 0%     | 72%                   | 0%                      | 25%                   |                            |
| RU     | 55%    | 0%     | 0%                    | 0%                      | 45%                   | Same mix as CN was assumed |
| US     | 28%    | 0%     | 35%                   | 0%                      | 37%                   |                            |
| GLO    | 53%    | 0%     | 11%                   | 0%                      | 36%                   |                            |

The low-emission scenario was set to align with IEA's Net Zero Emissions (NZE) scenario.<sup>5</sup> In particular, the global average share of secondary steelmaking would increase to 46% (in comparison to 38% under SDS). The share of other low-carbon production routes (e.g., hydrogen-based DRI-EAF and iron ore-electrolysis-EAF) would reach 23% on the global average (in comparison to 8% under SDS). Since NZE only analyzed the global overview, the difference of global shares between NZE and SDS (15% for other low-carbon routes and 8% for secondary steelmaking) was added to the regional shares under SDS for the low-emission scenario in this study. As a result, the ratio of other pathways (BF-BOF, SR-BOF and DRI-EAF) would decrease accordingly. However, the relative ratio among the three routes was kept the same as in SDS.

Table S21 Share of different primary steel production routes under the low-emission scenario in 2050, by region, adapted from IEA<sup>2</sup>

| Region | BF-BOF | SR-BOF | DRI-EAF<br>(natural gas) | Other<br>carbon routes | low- | Secondary<br>steelmaking | Note                       |
|--------|--------|--------|--------------------------|------------------------|------|--------------------------|----------------------------|
| CN     | 19%    | 4%     | 0%                       | 23%                    |      | 54%                      |                            |
| EU     | 8%     | 1%     | 0%                       | 26%                    |      | 65%                      |                            |
| IN     | 17%    | 12%    | 7%                       | 30%                    |      | 33%                      |                            |
| JP     | 8%     | 1%     | 0%                       | 26%                    |      | 65%                      | Same mix as EU was assumed |
| KR     | 8%     | 1%     | 0%                       | 26%                    |      | 65%                      | Same mix as EU was assumed |
| RAF    | 24%    | 0%     | 15%                      | 33%                    |      | 28%                      |                            |
| RME    | 0%     | 0%     | 33%                      | 29%                    |      | 37%                      |                            |
| RU     | 19%    | 4%     | 0%                       | 23%                    |      | 54%                      | Same mix as CN was assumed |
| US     | 7%     | 0%     | 28%                      | 14%                    |      | 51%                      |                            |
| GLO    | 19%    | 5%     | 7%                       | 23%                    |      | 46%                      |                            |

With steel production projections ( $P_{steel}$ , Mt/year), the share of each production route ( $f_j$ , %,  $j$  denotes BF-BOF, SR-BOF, or DRI-EAF), and the specific CO<sub>2</sub> emission factors of the corresponding production route ( $EF_{steel,j}$ , in tonne CO<sub>2</sub>/tonne steel), we then calculated the regional CO<sub>2</sub> emissions from each type of steel mills ( $E_{CO_2,steel\ mills,j}$ , Mt/year) under the two scenarios (Eqn (3)).

$$E_{CO_2,steel\ mills,j} = P_{steel} \times f_j \times EF_{steel,j} \quad (3)$$

The regionalized projection of steel production by route and the corresponding CO<sub>2</sub> emissions under the high- and low-emission scenarios are summarized in Table S22.

Table S22 Projection of steel production and the corresponding CO<sub>2</sub> emissions under high- and low-emission scenarios, by route and region

| Route  | Region | High-emission scenario           |                                           |  | Low-emission scenario            |                                           |  |
|--------|--------|----------------------------------|-------------------------------------------|--|----------------------------------|-------------------------------------------|--|
|        |        | Steel<br>production<br>(Mt/year) | CO <sub>2</sub><br>emissions<br>(Mt/year) |  | Steel<br>production<br>(Mt/year) | CO <sub>2</sub><br>emissions<br>(Mt/year) |  |
| BF-BOF | CN     | 488                              | 978                                       |  | 122                              | 195                                       |  |
|        | EU     | 73                               | 119                                       |  | 9                                | 15                                        |  |
|        | IN     | 229                              | 543                                       |  | 45                               | 72                                        |  |
|        | JP     | 39                               | 64                                        |  | 6                                | 9                                         |  |
|        | KR     | 28                               | 56                                        |  | 4                                | 7                                         |  |
|        | RAF    | 102                              | 194                                       |  | 15                               | 24                                        |  |
|        | RME    | 3                                | 6                                         |  | 0                                | 0                                         |  |
|        | RU     | 42                               | 66                                        |  | 10                               | 16                                        |  |
|        | US     | 31                               | 48                                        |  | 6                                | 9                                         |  |
|        | RoW    | 322                              | 511                                       |  | 149                              | 239                                       |  |
|        | GLO    | 1357                             | 2584                                      |  | 367                              | 587                                       |  |
| SR-BOF | CN     | 0                                | 0                                         |  | 28                               | 36                                        |  |
|        | EU     | 0                                | 0                                         |  | 1                                | 1                                         |  |

|         |     |     |     |     |     |
|---------|-----|-----|-----|-----|-----|
|         | IN  | 0   | 0   | 32  | 41  |
|         | JP  | 0   | 0   | 1   | 1   |
|         | KR  | 0   | 0   | 0   | 1   |
|         | RAF | 0   | 0   | 0   | 0   |
|         | RME | 0   | 0   | 0   | 0   |
|         | RU  | 0   | 0   | 2   | 3   |
|         | US  | 0   | 0   | 0   | 0   |
|         | RoW | 0   | 0   | 40  | 51  |
|         | GLO | 0   | 0   | 104 | 133 |
|         | CN  | 0   | 0   | 0   | 0   |
|         | EU  | 3   | 3   | 0   | 0   |
|         | IN  | 83  | 78  | 18  | 15  |
|         | JP  | 2   | 2   | 0   | 0   |
|         | KR  | 1   | 1   | 0   | 0   |
| DRI-EAF | RAF | 92  | 86  | 9   | 8   |
|         | RME | 68  | 64  | 23  | 19  |
|         | RU  | 0   | 0   | 0   | 0   |
|         | US  | 38  | 36  | 25  | 21  |
|         | RoW | 38  | 35  | 52  | 44  |
|         | GLO | 326 | 305 | 126 | 106 |

### S1.1.3 CO<sub>2</sub> emission scenarios from cement kilns

#### S1.1.3.1 *Projection of cement production volume*

Cement production in 2019 was reported by U.S. Geological Survey (USGS)<sup>16</sup> for selected regions. This data source was supplemented by the statistics from regional cement associations for KR,<sup>17</sup> and EU and RAF.<sup>18</sup>

For the high-emission scenario, the regionalized annual growth rate of cement production was set according to the high-variety case in IEA's *Technology Roadmap* for cement (Table S23).<sup>1</sup>

Table S23 Cement production annual growth, from 2019 to 2050 under the high-emission scenario, by region

| Region | Annual growth | Data source | Note                                       |
|--------|---------------|-------------|--------------------------------------------|
| CN     | -0.8%         |             |                                            |
| EU     | 0.3%          |             | Projection for "Europe" was used as proxy  |
| IN     | 5.1%          |             |                                            |
| JP     | 0.3%          |             | The same growth rate as EU was assumed     |
| KR     | 0.3%          | 1           | The same growth rate as EU was assumed     |
| RAF    | 7.9%          |             |                                            |
| RME    | 0.8%          |             |                                            |
| RU     | 1.2%          |             | Projection for "Eurasia" was used as proxy |
| US     | 2.0%          |             | Projection for "America" was used as proxy |
| GLO    | 0.8%          |             |                                            |



Since the IEA’s *Technology Roadmap* for cement only examined pathways to keep the temperature increase within 2°C, it is plausible that more efforts would be required in the 1.5°C pathways-compatible low-emission scenario. Therefore, we assumed that the cement production outside China would be 10% lower than the low-variety case set by IEA. Projections for China based on annual consumption per capita and cement stocks per capita revealed that cement production in China would decrease drastically to 800 Mt/year,<sup>19, 20</sup> which was used for the low-emission scenario in this study. The regionalized annual growth rate of cement production was summarized in Table S24.

Table S24 Cement production annual growth, from 2019 to 2050 under the low-emission scenario, by region

| Region | Annual growth | Data source | Note                                                                                          |
|--------|---------------|-------------|-----------------------------------------------------------------------------------------------|
| CN     | -2.1%         | 19, 20      | Calculated with the assumption that the annual cement production in 2050 would drop to 800 Mt |
| EU     | -0.3%         | 1           | Projection for “Europe” was used as proxy                                                     |
| IN     | 3.6%          | 1           |                                                                                               |
| JP     | -0.3%         | 1           | The same growth rate as EU was assumed                                                        |
| KR     | -0.3%         | 1           | The same growth rate as EU was assumed                                                        |
| RAF    | 5.9%          | 1           |                                                                                               |
| RME    | 0.1%          | 1           |                                                                                               |
| RU     | 0.4%          | 1           | Projection for “Eurasia” was used as proxy                                                    |
| US     | 1.0%          | 1           | Projection for “America” was used as proxy                                                    |
| GLO    | -0.4%         | 1           |                                                                                               |

### S1.1.3.2 Specific carbon intensity

**Process emission** ( $EF_{cement\ process}$ ): the default CO<sub>2</sub> emissions from limestone calcination is 0.52 tonnes CO<sub>2</sub>/tonne clinker.<sup>10</sup> This was considered to be the same in all scenarios.

**Clinker factor** ( $CF$ ): clinker factor (tonne clinker/tonne cement) is the weight percentage of clinker in cement. Clinker production is the most energy intensive step during cement production. Therefore, reducing clinker factor can contribute to the reduction of CO<sub>2</sub> emissions.<sup>1</sup> The clinker factor depends on the required mechanical properties of its end-use applications. IEA set the clinker factor of 0.57 to be a key milestone for its NZE,<sup>5</sup> which was used in this study for all regions under the low-emission scenario. The regional clinker factors under the high-emission scenario were set according to IEA’s 2 degree scenario (2DS) in 2030 (Table S25).<sup>1</sup>

Table S25 Clinker factor under the high-emission scenario, by region

| Region | Clinker factor | Data source | Note                                                  |
|--------|----------------|-------------|-------------------------------------------------------|
| CN     | 0.58           | 1           |                                                       |
| EU     | 0.67           | 1           | Projection for “Europe” was used as proxy             |
| IN     | 0.67           | 1           |                                                       |
| JP     | 0.72           | 1           | Projection for “Other Asia Pacific” was used as proxy |
| KR     | 0.72           | 1           | Projection for “Other Asia Pacific” was used as proxy |

|     |      |   |                                            |
|-----|------|---|--------------------------------------------|
| RAF | 0.70 | 1 |                                            |
| RME | 0.66 | 1 |                                            |
| RU  | 0.72 | 1 | Projection for “Eurasia” was used as proxy |
| US  | 0.67 | 1 | Projection for “America” was used as proxy |
| GLO | 0.66 | 1 |                                            |

**Thermal energy consumption ( $E_{th}$ ):** regional thermal energy consumption (in MJ/tonne clinker) under the high-emission scenario were set according to IEA’s 2DS in 2030 (Table S26).<sup>1</sup> For the low-emission scenario, the thermal energy consumption was set at the BAT level (2900 MJ/tonne clinker)<sup>21</sup> for all regions.

Table S26 Thermal energy consumption under the high-emission scenario, by region

| Region | Thermal energy consumption (MJ/tonne clinker) | Data source | Note                                                  |
|--------|-----------------------------------------------|-------------|-------------------------------------------------------|
| CN     | 3040                                          | 1           |                                                       |
| EU     | 3434                                          | 1           | Projection for “Europe” was used as proxy             |
| IN     | 2975                                          | 1           |                                                       |
| JP     | 3542                                          | 1           |                                                       |
| KR     | 3542                                          | 1           | Projection for “Other Asia Pacific” was used as proxy |
| RAF    | 3673                                          | 1           |                                                       |
| RME    | 3372                                          | 1           |                                                       |
| RU     | 4523                                          | 1           | Projection for “Eurasia” was used as proxy            |
| US     | 3625                                          | 1           | Projection for “America” was used as proxy            |
| GLO    | 3323                                          | 1           |                                                       |

**Fuel mix ( $r$ ):** fossil fuels are the predominant fuels used in the cement industry today. Alternative fuels such as biomass and industrial waste are increasingly used to reduce the carbon footprint of the industry.

For the high-emission scenario in 2050, the fuel mix was set to resemble 2DS in 2030 in IEA’s *Technology Roadmap* for cement.<sup>1</sup> For the low-emission scenario, the share of alternative fuels (biomass and industrial waste) was set to 60% for the Annex I Parties under the Kyoto Protocol (EU, JP, KR, US) and 35% for the non-Annex I Parties (CN, IN, RAF, RME, RU).<sup>22</sup> The relative shares among each fuel type within fossil fuels (i.e., coal, oil, and natural gas) and alternative fuels (i.e., biomass and industrial waste) were assumed to be the same as under the high-emission scenario. Table S27 summarizes the regional fuel mix under high- and low-emission scenarios.

Table S27 Fuel mix in cement kilns, by scenario and region

| Region                        | Coal | Oil | Natural gas | Biomass | Industrial waste | Note                                      |
|-------------------------------|------|-----|-------------|---------|------------------|-------------------------------------------|
| <i>High-emission scenario</i> |      |     |             |         |                  |                                           |
| CN                            | 87%  | 0%  | 2%          | 4%      | 6%               |                                           |
| EU                            | 22%  | 24% | 14%         | 13%     | 27%              | Projection for “Europe” was used as proxy |
| IN                            | 56%  | 31% | 0%          | 6%      | 8%               |                                           |

|                              |     |     |     |     |     |                                                       |
|------------------------------|-----|-----|-----|-----|-----|-------------------------------------------------------|
| JP                           | 67% | 4%  | 4%  | 10% | 15% | Projection for “Other Asia Pacific” was used as proxy |
| KR                           | 67% | 4%  | 4%  | 10% | 15% |                                                       |
| RAF                          | 7%  | 31% | 46% | 6%  | 10% | Projection for “Eurasia” was used as proxy            |
| RME                          | 11% | 38% | 34% | 7%  | 11% |                                                       |
| RU                           | 21% | 0%  | 68% | 4%  | 7%  |                                                       |
| US                           | 24% | 37% | 14% | 8%  | 18% | Projection for “America” was used as proxy            |
| GLO                          | 56% | 14% | 13% | 6%  | 11% |                                                       |
| <i>Low-emission scenario</i> |     |     |     |     |     |                                                       |
| CN                           | 63% | 0%  | 2%  | 14% | 21% |                                                       |
| EU                           | 15% | 16% | 9%  | 19% | 41% |                                                       |
| IN                           | 42% | 23% | 0%  | 15% | 20% |                                                       |
| JP                           | 36% | 2%  | 2%  | 24% | 36% |                                                       |
| KR                           | 36% | 2%  | 2%  | 24% | 36% |                                                       |
| RAF                          | 5%  | 24% | 36% | 12% | 23% |                                                       |
| RME                          | 9%  | 30% | 27% | 14% | 21% |                                                       |
| RU                           | 15% | 0%  | 50% | 14% | 21% |                                                       |
| US                           | 13% | 20% | 7%  | 17% | 43% |                                                       |
| GLO                          | 42% | 11% | 10% | 14% | 23% |                                                       |

**Specific emission factor ( $EF_{cement}$ ):** the specific fossil and biogenic CO<sub>2</sub> emission factors for a region (in tonne CO<sub>2</sub>/tonne cement) was calculated using Eqn (4) and (5). The default emission factor for each fuel type  $k$  ( $EF_{fuel,k}$ ) (tonne CO<sub>2</sub>/TJ fuel) from the *IPCC Guidelines for National Greenhouse Gas Inventories* was used in the calculation.<sup>10</sup>

$$EF_{cement,fossil} = CF \times (EF_{cement\ process} + E_{th} \times \sum_k \frac{EF_{fuel,k} \times r_k}{10^6}) \quad (4)$$

$k$  denotes individual types of fossil fuels (coal, oil, natural gas, and industrial waste).

$$EF_{cement,biogenic} = CF \times E_{th} \times EF_{biomass} \times r_{biomass} \quad (5)$$

With cement production projections ( $P_{steel}$ , Mt/year), and the specific CO<sub>2</sub> emission factors ( $EF_{cement}$ , in tonne CO<sub>2</sub>/tonne cement), we then calculated the regional CO<sub>2</sub> emissions from each type of steel mills ( $E_{CO_2,steel\ mills,j}$ , Mt/year) under the two scenarios (Eqn (6)).

$$E_{CO_2,cement} = P_{cement} \times EF_{cement} \quad (6)$$

The regionalized projection of cement and the corresponding CO<sub>2</sub> emissions under the high- and low-emission scenarios are summarized in Table S28.

Table S28 Projection of cement production and the corresponding CO<sub>2</sub> emissions, by scenario and region

| Region | High-emission scenario      |                            |                 |                              |                 | Low-emission scenario       |                            |                 |                              |                 |
|--------|-----------------------------|----------------------------|-----------------|------------------------------|-----------------|-----------------------------|----------------------------|-----------------|------------------------------|-----------------|
|        | Cement production (Mt/year) | Fossil emissions (Mt/year) | CO <sub>2</sub> | Biogenic emissions (Mt/year) | CO <sub>2</sub> | Cement production (Mt/year) | Fossil emissions (Mt/year) | CO <sub>2</sub> | Biogenic emissions (Mt/year) | CO <sub>2</sub> |

|     |      |      |    |      |      |    |
|-----|------|------|----|------|------|----|
| CN  | 1713 | 796  | 13 | 800  | 357  | 19 |
| EU  | 202  | 110  | 6  | 165  | 73   | 5  |
| IN  | 882  | 459  | 10 | 723  | 316  | 18 |
| JP  | 59   | 35   | 1  | 48   | 21   | 2  |
| KR  | 56   | 34   | 1  | 46   | 20   | 2  |
| RAF | 710  | 386  | 10 | 582  | 244  | 12 |
| RME | 204  | 103  | 3  | 167  | 70   | 4  |
| RU  | 76   | 45   | 1  | 62   | 26   | 1  |
| US  | 143  | 79   | 3  | 117  | 53   | 3  |
| RoW | 1097 | 687  | 24 | 899  | 404  | 18 |
| GLO | 5141 | 2734 | 73 | 3610 | 1586 | 84 |

## S1.1.4 CO<sub>2</sub> emission scenarios from kraft pulp mills

### S1.1.4.1 Projection of kraft pulp production volume

The regional production volume of kraft pulp in 2019 was summarized based on the database of Food and Agriculture Organization of the United Nations (FAO).<sup>23</sup> The Global Forest Products Model (GFPMX) predicts the consumption and production of forest products in 180 countries till 2070 based on population, Gross Domestic Product (GDP), local price and international trade.<sup>24</sup> The prediction of wood pulp production from the GFPMX was used in this study to derive the annual growth rate of kraft pulp production from 2019 to 2050 for the high-emission scenario. Under the low-emission scenario, the regional production was set to be 15% lower than that under the high-emission scenario, as this is in line with the IEA's NZE scenario.<sup>25</sup>

Table S29 Kraft production annual growth, from 2019 to 2050, by scenario and region

| Region | Kraft production annual growth |                       |
|--------|--------------------------------|-----------------------|
|        | High-emission scenario         | Low-emission scenario |
| CN     | 1.4%                           | 0.7%                  |
| EU     | 1.2%                           | 0.5%                  |
| IN     | 9.1%                           | 7.3%                  |
| JP     | 0.3%                           | -0.2%                 |
| KR     | 2.1%                           | 1.3%                  |
| RAF    | -0.5%                          | -0.9%                 |
| RME    | 0.8%                           | 0.2%                  |
| RU     | 1.5%                           | 0.8%                  |
| US     | 0.3%                           | -0.2%                 |
| GLO    | 1.1%                           | 0.5%                  |

### S1.1.4.2 Specific carbon intensity

The main CO<sub>2</sub> emission sources at a kraft pulp mill include the kraft recovery boiler, multi-fuel boiler, and lime kiln.<sup>26</sup> In the kraft recovery boiler, woody materials in black liquor is combusted to produce energy for recycling of the cooking chemical. In the multi-fuel boiler,

wood residuals from the wood handling unit are the main fuels. Additional fossil fuel is only required in the lime kiln to recover lime, which is then used to recover white liquor. The biogenic CO<sub>2</sub> emission factors were assumed to be the same as a reference mill reported by IEA Greenhouse Gas R&D Programme (IEAGHG)<sup>26</sup> (2.6 tonne CO<sub>2</sub>/tonne kraft pulp) in all regions in this study due to a lack of regional data.

Kraft pulp mills were considered as net energy exporters. Biogenic CO<sub>2</sub> emissions are hence only related to how much biofuel is available for combustion. In this study, we assumed that black liquor and wood residue would continue to be used for energy recovery. Potential material valorization of lignin recovered from black liquor was not discussed in this paper. Therefore, the biogenic CO<sub>2</sub> emission factors of kraft pulp mills were assumed to be the same in 2050 as today.

For lime kilns on site of kraft pulp mills, we assumed that the thermal energy efficiency would increase by 15% from the level in 2019 to 1220 MJ/tonne kraft pulp under the high-emission scenario in 2050, and would be improved to the practical minimum level (1055 MJ/tonne kraft pulp)<sup>27</sup> under the low-emission scenario. The fuel mix used in the lime kiln was set to be the same as in the cement industry in all scenarios.

The fossil and biogenic CO<sub>2</sub> emissions from kraft pulp mills in a certain region (in Mt/year) is therefore calculated with Eqn. (7)-(8):

$$E_{fossil\ CO_2,pulp} = P_{pulp} \times (E_{th,lime\ kiln} \times \sum_m \frac{EF_{fossil\ fuel,m} \times r_m}{10^6}) \quad (7)$$

$$E_{biogenic\ CO_2,pulp} = P_{pulp} \times (2.6 + E_{th,lime\ kiln} \times \frac{EF_{biofuel} \times r_{biofuel}}{10^6}) \quad (8)$$

Where  $P_{pulp}$  stands for the annual production volume of kraft pulp (Mt/year),  $E_{th,lime\ kiln}$  is the unit thermal energy consumption in the lime kiln (MJ/tonne kraft pulp),  $r_m$  and  $EF_{fossil\ fuel,m}$  are the share of fuel  $m$  in the lime kiln and its corresponding CO<sub>2</sub> emission factors (tonne CO<sub>2</sub>/TJ fuel) as from the *IPCC Guidelines for National Greenhouse Gas Inventories*.<sup>10</sup>  $r_{biofuel}$  and  $EF_{biofuel}$  are the share and emission factor of solid biomass as fuel in the lime kiln.

The regionalized projection of kraft pulp and the corresponding CO<sub>2</sub> emissions under the high- and low-emission scenarios are summarized in Table S30.

Table S30 Projection of kraft pulp production and the corresponding CO<sub>2</sub> emissions, by scenario and region

| Region | High-emission scenario          |                                            |                                              | Low-emission scenario           |                                            |                                              |
|--------|---------------------------------|--------------------------------------------|----------------------------------------------|---------------------------------|--------------------------------------------|----------------------------------------------|
|        | Kraft pulp production (Mt/year) | Fossil CO <sub>2</sub> emissions (Mt/year) | Biogenic CO <sub>2</sub> emissions (Mt/year) | Kraft pulp production (Mt/year) | Fossil CO <sub>2</sub> emissions (Mt/year) | Biogenic CO <sub>2</sub> emissions (Mt/year) |
| CN     | 14                              | 2                                          | 38                                           | 12                              | 1                                          | 32                                           |
| EU     | 35                              | 4                                          | 92                                           | 30                              | 3                                          | 78                                           |
| IN     | 9                               | 1                                          | 24                                           | 8                               | 1                                          | 21                                           |
| JP     | 9                               | 1                                          | 22                                           | 7                               | 1                                          | 19                                           |
| KR     | 1                               | 0                                          | 2                                            | 1                               | 0                                          | 2                                            |
| RAF    | 1                               | 0                                          | 2                                            | 1                               | 0                                          | 2                                            |

|     |     |    |     |     |    |     |
|-----|-----|----|-----|-----|----|-----|
| RME | 0   | 0  | 0   | 0   | 0  | 0   |
| RU  | 8   | 1  | 21  | 7   | 1  | 18  |
| US  | 49  | 5  | 128 | 42  | 4  | 109 |
| RoW | 70  | 8  | 183 | 60  | 6  | 155 |
| GLO | 196 | 21 | 511 | 167 | 15 | 436 |

## S1.2 CO<sub>2</sub>-feedstock demand from the chemical industry

### S1.2.1 Production volumes of seven primary chemicals in 2050

Historical regional production volumes of the seven key chemicals and the corresponding data sources were summarized or estimated in Table S31 for the year of 2019. Their projected annual growth rates in production under high- and low- emission scenarios were reported in Table S33 and Table S34, respectively with detailed data sources and explanations. Due to data constraint, benzene, toluene, and xylene (BTX) aromatics were grouped together for the projections of production volumes.

Table S31 Production volumes of chemicals in 2019, by chemical and region

| Chemicals | Region | Production volume in 2019 (Mt) | Data source   | Data source category                 | Note                                                                                                                                        |
|-----------|--------|--------------------------------|---------------|--------------------------------------|---------------------------------------------------------------------------------------------------------------------------------------------|
| Urea      | CN     | 53                             | <sup>28</sup> | Regional industrial association      |                                                                                                                                             |
|           | EU     | 9                              | <sup>29</sup> | International industrial association |                                                                                                                                             |
|           | IN     | 24                             | <sup>30</sup> | United Nations                       |                                                                                                                                             |
|           | JP     | <1                             | <sup>30</sup> | United Nations                       |                                                                                                                                             |
|           | KR     | 0                              | <sup>30</sup> | United Nations                       |                                                                                                                                             |
|           | RAF    | 11                             | <sup>29</sup> | International industrial association |                                                                                                                                             |
|           | RME    | 23                             | <sup>29</sup> | International industrial association |                                                                                                                                             |
|           | RU     | 9                              | <sup>30</sup> | United Nations                       |                                                                                                                                             |
|           | US     | 10                             | <sup>31</sup> | Governmental organization            |                                                                                                                                             |
|           | RoW    | 37                             |               | Own estimation                       | Difference of global and regional production volumes                                                                                        |
|           | GLO    | 177                            | <sup>29</sup> | International industrial association |                                                                                                                                             |
| Methanol* | CN     | 36                             | <sup>32</sup> | Market insight report                | Extrapolated from 2018 production volume, assuming 4% annual growth rate <sup>33</sup>                                                      |
|           | EU     | 3                              | <sup>32</sup> | Market insight report                | Extrapolated from 2018 production volume (sum of “Central Europe” and “West Europe” as proxy), assuming 4% annual growth rate <sup>33</sup> |
|           | IN     | <1                             | <sup>34</sup> | Governmental organization            |                                                                                                                                             |
|           | JP     | 0                              | <sup>32</sup> | Market insight report                | Extrapolated from 2018 production volume, assuming 4% annual growth rate <sup>33</sup>                                                      |

|           |     |     |        |                                 |                                                                                                                                                             |
|-----------|-----|-----|--------|---------------------------------|-------------------------------------------------------------------------------------------------------------------------------------------------------------|
|           | KR  | 0   | 32     | Market insight report           | Extrapolated from 2018 production volume, assuming 4% annual growth rate <sup>33</sup>                                                                      |
|           | RAF | 3   | 32     | Market insight report           | Extrapolated from 2018 production volume, assuming 4% annual growth rate <sup>33</sup>                                                                      |
|           | RME | 15  | 32     | Market insight report           | Extrapolated from 2018 production volume, assuming 4% annual growth rate <sup>33</sup>                                                                      |
|           | RU  | 4   | 32     | Market insight report           | Extrapolated from 2018 production volume (FSU as proxy), assuming 4% annual growth rate <sup>33</sup>                                                       |
|           | US  | 6   | 35     | Market insight report           |                                                                                                                                                             |
|           | RoW | 15  |        | Own estimation                  | Difference of global and regional production volumes                                                                                                        |
|           | GLO | 82  | 32     | Market insight report           | Extrapolated from 2018 production volume, assuming 4% annual growth rate <sup>33</sup>                                                                      |
|           | CN  | 21  | 36     | Governmental organization       |                                                                                                                                                             |
|           | EU  | 18  | 37     | Regional industrial association |                                                                                                                                                             |
|           | IN  | 7   | 38     | Regional industrial association |                                                                                                                                                             |
|           | JP  | 6   | 39     | Governmental organization       |                                                                                                                                                             |
|           | KR  | 9   | 40     | Governmental organization       |                                                                                                                                                             |
|           | RAF | 2   | 41     | Market insight report           |                                                                                                                                                             |
| Ethylene  | RME | 32  | 42, 43 | Own estimation                  | Estimated with regional capacity (from market insight report <sup>42</sup> ) and capacity utilization (from regional industrial association <sup>43</sup> ) |
|           | RU  | 3   | 44     | Market insight report           | Unknown reporting year                                                                                                                                      |
|           | US  | 31  | 45     | Market insight report           |                                                                                                                                                             |
|           | RoW | 35  |        | Own estimation                  | Difference of global and regional production volumes                                                                                                        |
|           | GLO | 164 | 46     | Market insight report           |                                                                                                                                                             |
|           | CN  | 32  | 47     | Market insight report           |                                                                                                                                                             |
|           | EU  | 13  | 37     | Regional industrial association |                                                                                                                                                             |
|           | IN  | 6   | 38     | Regional industrial association |                                                                                                                                                             |
|           | JP  | 6   | 39     | Governmental organization       |                                                                                                                                                             |
|           | KR  | 8   | 40     | Governmental organization       |                                                                                                                                                             |
|           | RAF | 6   | 48     | Market insight report           |                                                                                                                                                             |
| Propylene | RME | 10  | 43, 49 | Own estimation                  | Estimated with regional capacity (from market insight report <sup>49</sup> ) and capacity utilization (from regional industrial association <sup>43</sup> ) |
|           | RU  | 2   | 48     | Market insight report           |                                                                                                                                                             |
|           | US  | 16  | 45     | Market insight report           |                                                                                                                                                             |
|           | RoW | 15  |        | Own estimation                  | Difference of global and regional production volumes                                                                                                        |
|           | GLO | 114 | 50     | Market insight report           |                                                                                                                                                             |

|                                         |     |     |        |                           |                                                                                                                                                                                                                                                                                    |
|-----------------------------------------|-----|-----|--------|---------------------------|------------------------------------------------------------------------------------------------------------------------------------------------------------------------------------------------------------------------------------------------------------------------------------|
| Benzene,<br>toluene,<br>xylene<br>(BTX) | CN  | 28  | 51, 52 | Own estimation            | Extrapolated from benzene <sup>51</sup> and para-xylene <sup>52</sup> production volume with a factor of 1.19, according to according to the global material flow analysis for the year 2013. <sup>53</sup>                                                                        |
|                                         | EU  | 11  | 37, 54 | Own estimation            | Extrapolated from 2015 BTX production volume <sup>54</sup> and production growth rate of benzene <sup>37</sup>                                                                                                                                                                     |
|                                         | IN  | 6   | 34     | Governmental organization |                                                                                                                                                                                                                                                                                    |
|                                         | JP  | 10  | 39     | Governmental organization |                                                                                                                                                                                                                                                                                    |
|                                         | KR  | 22  | 40     | Governmental organization |                                                                                                                                                                                                                                                                                    |
|                                         | RAF | 1   |        | Own estimation            | See description below                                                                                                                                                                                                                                                              |
|                                         | RME | 17  |        | Own estimation            | Estimated with regional capacity (from market insight report <sup>42</sup> ) and capacity utilization (from regional industrial association <sup>43</sup> )                                                                                                                        |
|                                         | RU  | 3   |        | Own estimation            | See description below                                                                                                                                                                                                                                                              |
|                                         | US  | 11  | 45     | Own estimation            | Extrapolated from benzene and para-xylene production volume <sup>45</sup> with a factor of 1.19, according to according to the global material flow analysis for the year 2013. <sup>53</sup>                                                                                      |
|                                         | RoW | 3   |        | Own estimation            | Difference of global and regional production volumes                                                                                                                                                                                                                               |
|                                         | GLO | 111 | 49     | Own estimation            | Extrapolated from benzene and para-xylene production volume <sup>49</sup> with a factor of 1.19, according to according to the global material flow analysis for the year 2013. <sup>53</sup> Extrapolated from 2017 demand volume, assuming 3.4% annual growth rate <sup>49</sup> |

\* excluding intermediate use for ethylene / propylene production

Due to data scarcity, the total BTX production in Russia Federation and Africa was estimated using the following method:

BTX aromatics are produced either as by-products during the steam cracking, or as by-products in refineries. The production volumes from the two routes were calculated or gathered separately as described below.

**Steam cracking:** during steam cracking, different feeds would yield different proportions of chemicals. For example, during ethane cracking, the typical yield of ethylene is 0.803, with no BTX produced. However, when naphtha is fed into steam crackers, the typical yields of ethylene and aromatics are 0.324 and 0.103, respectively.<sup>53</sup>

Hence, the regional production of BTX aromatics from steam crackers in Russia Federation and Africa was calculated based on their respective percentage of naphtha, ethane, and other types of feeds used in steam crackers according to the literature (Table S32),<sup>55</sup> in conjunction with the typical yields of ethylene and aromatics from each feed, and regional ethylene production (Table S31), as in Eqn (9). As the exact compositions of other types of feeds are unknown, we assumed that they would yield the same share of products as naphtha.



$$P_{BTX} = P_{ethylene} \times \frac{0.103(f_{naphtha} + f_{other})}{0.324(f_{naphtha} + f_{other}) + 0.803f_{ethane}} \quad (9)$$

$P_{BTX}$ : estimated production volume of BTX aromatics from steam crackers at a certain region;

$P_{ethylene}$ : production volume of ethylene at a certain region;

$f_{naphtha}$ ,  $f_{ethane}$ , and  $f_{other}$ : fractions of naphtha, ethane, and other types of oil fed into steam crackers at a certain region, respectively.

Table S32 Feedstock mix in steam crackers, by region, derived from IEA<sup>55</sup>

|     | $f_{naphtha}$ | $f_{ethane}$ | $f_{other}$ |
|-----|---------------|--------------|-------------|
| RU  | 71%           | 8%           | 22%         |
| RAF | 37%           | 34%          | 29%         |

**Refinery:** regional BTX production volumes in refineries in Eurasia and Africa were reported for the year of 2017.<sup>55</sup> Eurasia was used as a proxy for Russia Federation due to data constraint. The values were then extrapolated to the year of 2019, assuming an annual growth rate of 3.4% according to Deloitte.<sup>49</sup>

Table S33 Chemical production annual growth, from 2019 to 2050 under the high-emission scenario, by chemical and region

| Chemicals | Region | Annual growth | Data source | Note                                                                                                                                                                                                                                                          |
|-----------|--------|---------------|-------------|---------------------------------------------------------------------------------------------------------------------------------------------------------------------------------------------------------------------------------------------------------------|
| Urea      | CN     | -0.3%         | 55          | Urea production stagnated in China in the past decade <sup>36</sup> as a mitigation measure to reduce fertilizer over-application. Hence, the growth rate was assumed to be the same as in the EU, where ammonia production was forecast to slightly decrease |
|           | EU     | -0.3%         | 55          | The growth rate of ammonia was used as proxy                                                                                                                                                                                                                  |
|           | IN     | 4.0%          | 56          |                                                                                                                                                                                                                                                               |
|           | JP     | -0.3%         | 55          | The growth rate was assumed to be the same as in the EU due to the similarities in the population and economic growth projections of the two regions                                                                                                          |
|           | KR     | No production |             |                                                                                                                                                                                                                                                               |
|           | RAF    | 2.8%          | 55          | The growth rate of ammonia was used as proxy                                                                                                                                                                                                                  |
|           | RME    | 2.6%          | 55          | The growth rate of ammonia was used as proxy                                                                                                                                                                                                                  |
|           | RU     | 0.6%          | 55          | The growth rate of ammonia in Eurasia was used as proxy                                                                                                                                                                                                       |
|           | US     | 0.9%          | 55          | The growth rate of ammonia in North America was used as proxy                                                                                                                                                                                                 |
|           | GLO    | 1.0%          |             | The growth rate of ammonia was used as proxy                                                                                                                                                                                                                  |
| Methanol  | CN     | 2.1%          | 55          | The growth rate of methanol in Asia Pacific was used as proxy                                                                                                                                                                                                 |
|           | EU     | 0.4%          | 55          |                                                                                                                                                                                                                                                               |
|           | IN     | 5.4%          | 55          | The growth rate was assumed to be the same in RAF                                                                                                                                                                                                             |
|           | JP     | No production |             |                                                                                                                                                                                                                                                               |
|           | KR     | No production |             |                                                                                                                                                                                                                                                               |
|           | RAF    | 5.4%          | 55          |                                                                                                                                                                                                                                                               |
|           | RME    | 1.1%          | 55          |                                                                                                                                                                                                                                                               |
|           | RU     | 4.8%          | 55          | The growth rate of methanol in Eurasia was used as proxy                                                                                                                                                                                                      |
|           | US     | 4.4%          | 55          | The growth rate of methanol in North America was used as proxy                                                                                                                                                                                                |

|                                               |     |       |    |                                                                                                                            |
|-----------------------------------------------|-----|-------|----|----------------------------------------------------------------------------------------------------------------------------|
|                                               | GLO | 2.5%  | 55 |                                                                                                                            |
| Ethylene /<br>Propylene /<br>BTX<br>aromatics | CN  | 2.1%  | 55 | The growth rate of HVC* in Asia Pacific was used as proxy                                                                  |
|                                               | EU  | -0.9% | 55 | The growth rate of HVC, negative growth rate due to the accelerated recycling of plastics set by IEA <sup>55</sup>         |
|                                               | IN  | 7.9%  | 55 | The growth rate was assumed to be the same in RAF                                                                          |
|                                               | JP  | -0.9% | 55 | The growth rate was assumed to be the same in EU, due to the potential similar policies on accelerating plastics recycling |
|                                               | KR  | -0.9% | 55 | The growth rate was assumed to be the same in EU, due to the potential similar policies on accelerating plastics recycling |
|                                               | RAF | 7.9%  | 55 | The growth rate of HVC                                                                                                     |
|                                               | RME | 4.3%  | 55 | The growth rate of HVC                                                                                                     |
|                                               | RU  | 3.4%  | 55 | The growth rate of HVC in Eurasia was used as proxy                                                                        |
|                                               | US  | 1.1%  | 55 | The growth rate of HVC in North America was used as proxy                                                                  |
|                                               | GLO | 1.8%  | 55 | The growth rate of HVC                                                                                                     |

\* HVC – high value chemicals, including ethylene, propylene, benzene, toluene, and xylenes.

Table S34 Chemical production annual growth, from 2019 to 2050 under the low-emission scenario, by chemical and region

| Chemicals | Region | Annual growth | Data source | Note                                                                                                                                                                                                                                                                                                                                   |
|-----------|--------|---------------|-------------|----------------------------------------------------------------------------------------------------------------------------------------------------------------------------------------------------------------------------------------------------------------------------------------------------------------------------------------|
| Urea      | CN     | -1.2%         | 57          | The growth rate of nitrogen fertilizer with optimized application rate in 2050, same for other regions                                                                                                                                                                                                                                 |
|           | EU     | -0.7%         | 57          |                                                                                                                                                                                                                                                                                                                                        |
|           | IN     | -0.6%         | 57          |                                                                                                                                                                                                                                                                                                                                        |
|           | JP     | 0.0%          | 57          | The growth rate in “other OECD countries” was used as proxy                                                                                                                                                                                                                                                                            |
|           | KR     | 0.0%          | 57          | The growth rate in “other OECD countries” was used as proxy                                                                                                                                                                                                                                                                            |
|           | RAF    | 4.0%          | 57          | The growth rate in “Sub-Saharan Africa” was used as proxy                                                                                                                                                                                                                                                                              |
|           | RME    | 0.0%          | 57          | The growth rate in “Middle East and North Africa” was used as proxy                                                                                                                                                                                                                                                                    |
|           | RU     | 0.8%          | 57          | The growth rate in “Former Soviet Union” was used as proxy                                                                                                                                                                                                                                                                             |
|           | US     | -0.2%         | 57          | The growth rate in “USA and Canada” was used as proxy                                                                                                                                                                                                                                                                                  |
|           | GLO    | -0.2%         | 57          |                                                                                                                                                                                                                                                                                                                                        |
| Methanol  | CN     | 5.0%          | 58          | The production volume was assumed to be 1.53 times of the production volume under the high emission scenario (See GLO for detailed explanation). Same assumptions for other regions, if not otherwise specified.                                                                                                                       |
|           | EU     | 2.3%          | 58          |                                                                                                                                                                                                                                                                                                                                        |
|           | IN     | 10.1%         | 58          |                                                                                                                                                                                                                                                                                                                                        |
|           | JP     | No production | 58          |                                                                                                                                                                                                                                                                                                                                        |
|           | KR     | No production | 58          |                                                                                                                                                                                                                                                                                                                                        |
|           | RAF    | 10.1%         | 58          |                                                                                                                                                                                                                                                                                                                                        |
|           | RME    | 3.3%          | 58          |                                                                                                                                                                                                                                                                                                                                        |
|           | RU     | 9.1%          | 58          |                                                                                                                                                                                                                                                                                                                                        |
|           | US     | 8.4%          | 58          |                                                                                                                                                                                                                                                                                                                                        |
|           | GLO    | 5.6%          | 58          | Global methanol production in 2050 under 1.5°C scenario would increase to 224 Mt, due to its potential application as e.g., low-carbon shipping fuel. <sup>58</sup> This number excludes methanol demand in methanol-to-olefins (MTO) / methanol-to-aromatics (MTA) sectors to avoid double counting of CO <sub>2</sub> demand, as the |

demand from MTO and MTA was counted in ethylene, propylene, and BTX aromatics. This is 1.53 times of the production volume under the high-emission scenario (Table S33). The same ratio was taken for regional projections

|                                               |     |       |    |                                                                                                                                                                                                                                                                                                                                                                             |
|-----------------------------------------------|-----|-------|----|-----------------------------------------------------------------------------------------------------------------------------------------------------------------------------------------------------------------------------------------------------------------------------------------------------------------------------------------------------------------------------|
| Ethylene /<br>Propylene /<br>BTX<br>aromatics | CN  | -0.3% | 13 | 45% of raw materials for plastic can be saved through reuse and mechanical recycling. <sup>13</sup> As the majority of HVCs are further processed into plastics, the growth rate was calculated based on the assumption that the production would be 45% less than under the high-emission scenario in 2050. Same assumptions for other regions, if not otherwise specified |
|                                               | EU  | -1.5% | 13 | Since accelerated recycling was already into account in the modeling of the high-emission scenario, the 45% reduction potential was assumed to be based on the production volume in 2019 to avoid double counting the reduction potential.                                                                                                                                  |
|                                               | IN  | 2.9%  | 13 |                                                                                                                                                                                                                                                                                                                                                                             |
|                                               | JP  | -1.5% | 13 | The growth rate was assumed to be the same in EU                                                                                                                                                                                                                                                                                                                            |
|                                               | KR  | -1.5% | 13 | The growth rate was assumed to be the same in EU                                                                                                                                                                                                                                                                                                                            |
|                                               | RAF | 2.9%  | 13 |                                                                                                                                                                                                                                                                                                                                                                             |
|                                               | RME | 0.9%  | 13 |                                                                                                                                                                                                                                                                                                                                                                             |
|                                               | RU  | 0.4%  | 13 |                                                                                                                                                                                                                                                                                                                                                                             |
|                                               | US  | -0.9% | 13 |                                                                                                                                                                                                                                                                                                                                                                             |
|                                               | GLO | -0.3% | 13 |                                                                                                                                                                                                                                                                                                                                                                             |

### S1.2.2 CO<sub>2</sub>-based production routes

The CO<sub>2</sub>-based production routes of the seven key chemicals and their corresponding specific CO<sub>2</sub>-feedstock needs were summarized in Table S35.

Table S35 CO<sub>2</sub>-based production routes of key chemicals

| Chemicals          | CO <sub>2</sub> -based production routes                            | Specific CO <sub>2</sub> demand (kg CO <sub>2</sub> /kg chemical) | Technology Level (TRL) | Readiness |
|--------------------|---------------------------------------------------------------------|-------------------------------------------------------------------|------------------------|-----------|
| 1. Urea            | Reaction of CO <sub>2</sub> and ammonia, same as existing processes | 0.75                                                              | 9                      |           |
| 2. Methanol        | Direct hydrogenation of CO <sub>2</sub>                             | 1.39                                                              | 7                      |           |
| 3. Ethylene        | Methanol-to-olefins (MTO)                                           | 3.61                                                              | 9                      |           |
| 4. Propylene       | Methanol-to-olefins (MTO)                                           | 3.61                                                              | 9                      |           |
| 5-7. BTX aromatics | Methanol-to-aromatics (MTA)                                         | 5.98                                                              | 7                      |           |

**Chemical 1: ammonia and urea.** Ammonia was assumed to be produced with the Haber-Bosch process, with hydrogen coming from water electrolysis. The production of 1 kg of ammonia would require 0.178 kg of hydrogen.<sup>59</sup> Around 55% of ammonia is further processed into urea worldwide today, consuming CO<sub>2</sub> as feedstock. This production pathway was commercialized and was assumed to stay the same in 2050. Assuming a conversion rate of 97.7%,<sup>53</sup> 1 kg of urea would require 0.75 kg of CO<sub>2</sub> stoichiometrically.

**Chemical 2: methanol.** Conventionally, methanol is produced from fossil fuel-based synthesis gas (syngas). The CO<sub>2</sub>-based methanol production assumed in this study was based on the principle of direct hydrogenation of CO<sub>2</sub>, using low-carbon hydrogen and CO<sub>2</sub> sourced from carbon capture as feedstocks. This production pathway reached a TRL of 7.<sup>59</sup> Based on a 99.0%

conversion rate,<sup>53</sup> specific CO<sub>2</sub> and H<sub>2</sub> demand for methanol production was calculated to be 1.39 kg CO<sub>2</sub> and 0.189 kg H<sub>2</sub>/kg CH<sub>3</sub>OH.

**Chemical 3 and 4: ethylene and propylene.** Light olefins can be produced with the commercialized methanol-to-olefin (MTO) process. The process is widely adopted in China today, with methanol mainly produced from coal.<sup>60</sup> Therefore, MTO route has a TRL of 9. CO<sub>2</sub>-based methanol was assumed to be utilized for ethylene and propylene production in this study. 2.83 kg methanol is required to produce 1 kg of ethylene or propylene.<sup>59</sup> This was translated into 3.93 kg specific CO<sub>2</sub> demand and 0.535 kg specific H<sub>2</sub> demand.

**Chemical 5-7: benzene, toluene, and xylene (BTX).** The methanol-to-aromatics (MTA) route was assumed to be the main production route for BTX in a CO<sub>2</sub>-based chemical industry. The process was reported to have a TRL of 7, with total BTX yield of 56%.<sup>59</sup> This means 4.3 kg methanol is required to produce 1 kg of BTX.<sup>59</sup> Ultimately, 5.98 kg CO<sub>2</sub> and 1.13 kg H<sub>2</sub> is needed to produce 1 kg of BTX. Due to data constraint, we did not differentiate the yield difference among BTX.

### S1.2.3 Quantifying CO<sub>2</sub>-feedstock demand in the chemical industry in 2050

With the projection of the regional production volume of  $P_i$  (in Megatonne (MT)/year) of each primary chemical  $i$  and its corresponding specific CO<sub>2</sub> demand  $SCD_i$ , the total regional CO<sub>2</sub> demand ( $TCD$ ) can be calculated with Eqn (10), assuming all seven primary chemicals are exclusively produced via CO<sub>2</sub>-based routes.

$$TCD = \sum_i P_i \times SCD_i \quad (10)$$

The calculated regional CO<sub>2</sub> demand in 2050 as feedstock per key chemical was summarized in under high- and low-emission scenarios (Table S36).

Table S36 CO<sub>2</sub> demand in 2050 as chemical feedstocks, by scenario, chemical and region

| Chemicals | Region | CO <sub>2</sub> demand in 2050 (Mt/year) |                       |
|-----------|--------|------------------------------------------|-----------------------|
|           |        | High-emission scenario                   | Low-emission scenario |
| Urea      | CN     | 37                                       | 26                    |
|           | EU     | 6                                        | 5                     |
|           | IN     | 41                                       | 15                    |
|           | JP     | 0                                        | 0                     |
|           | KR     | 0                                        | 0                     |
|           | RAF    | 16                                       | 19                    |
|           | RME    | 31                                       | 17                    |
|           | RU     | 8                                        | 8                     |
|           | US     | 9                                        | 7                     |
|           | RoW    | 25                                       | 27                    |
|           | GLO    | 174                                      | 124                   |
| Methanol  | CN     | 83                                       | 127                   |
|           | EU     | 5                                        | 7                     |
|           | IN     | 1                                        | 2                     |

|                                         |     |      |     |
|-----------------------------------------|-----|------|-----|
|                                         | JP  | 0    | 0   |
|                                         | KR  | 0    | 0   |
|                                         | RAF | 10   | 15  |
|                                         | RME | 27   | 42  |
|                                         | RU  | 16   | 24  |
|                                         | US  | 19   | 29  |
|                                         | RoW | 43   | 66  |
|                                         | GLO | 203  | 311 |
| <hr/>                                   |     |      |     |
|                                         | CN  | 123  | 68  |
|                                         | EU  | 49   | 37  |
|                                         | IN  | 85   | 47  |
|                                         | JP  | 17   | 13  |
|                                         | KR  | 24   | 18  |
| Ethylene                                | RAF | 22   | 12  |
|                                         | RME | 266  | 147 |
|                                         | RU  | 23   | 13  |
|                                         | US  | 152  | 83  |
|                                         | RoW | 170  | 93  |
|                                         | GLO | 930  | 529 |
| <hr/>                                   |     |      |     |
|                                         | CN  | 192  | 129 |
|                                         | EU  | 35   | 26  |
|                                         | IN  | 70   | 45  |
|                                         | JP  | 15   | 11  |
|                                         | KR  | 22   | 17  |
| Propylene                               | RAF | 76   | 51  |
|                                         | RME | 82   | 57  |
|                                         | RU  | 17   | 11  |
|                                         | US  | 75   | 37  |
|                                         | RoW | 62   | 73  |
|                                         | GLO | 647  | 458 |
| <hr/>                                   |     |      |     |
|                                         | CN  | 275  | 185 |
|                                         | EU  | 49   | 37  |
|                                         | IN  | 119  | 77  |
|                                         | JP  | 44   | 33  |
|                                         | KR  | 97   | 72  |
| Benzene,<br>toluene,<br>xylene<br>(BTX) | RAF | 11   | 7   |
|                                         | RME | 229  | 160 |
|                                         | RU  | 33   | 22  |
|                                         | US  | 89   | 43  |
|                                         | RoW | 94   | 26  |
|                                         | GLO | 1039 | 662 |
| <hr/>                                   |     |      |     |
| Total CO <sub>2</sub><br>demand         | CN  | 710  | 536 |
|                                         | EU  | 145  | 112 |
|                                         | IN  | 317  | 185 |
| <hr/>                                   |     |      |     |

|                |     |      |      |
|----------------|-----|------|------|
| (sum of above) | JP  | 75   | 56   |
|                | KR  | 143  | 107  |
|                | RAF | 134  | 104  |
|                | RME | 636  | 423  |
|                | RU  | 97   | 78   |
|                | US  | 344  | 199  |
|                | RoW | 393  | 285  |
|                | GLO | 2993 | 2085 |

## S1.3 Environmental impacts of carbon capture

### S1.3.1 Energy need for capturing 1 kg CO<sub>2</sub> from different industries

A simplified flowsheet of carbon capture with chemical absorption is shown in Fig. S1.

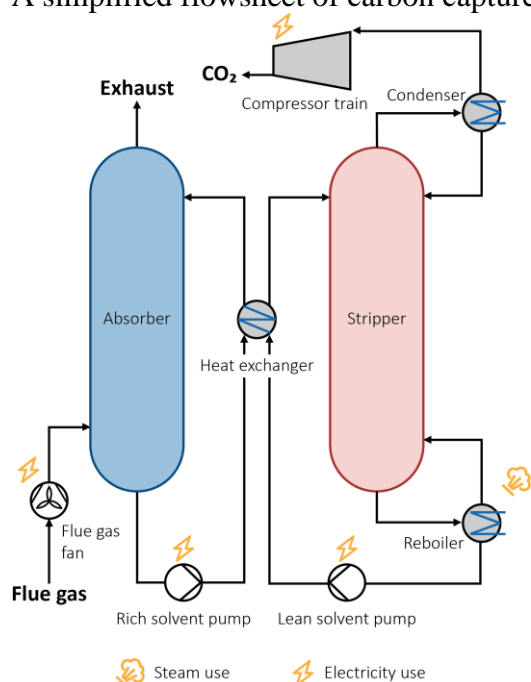

Fig. S1 Simplified flowsheet of carbon capture with chemical absorption

The additional steam and electricity need for carbon capture was obtained by comparing the system with and without carbon capture. Table S37 summarizes the additional energy need due to carbon capture for different industries and explains the corresponding systems with and without carbon capture.

Table S37 Additional fuel and electricity need for capturing 1 kg CO<sub>2</sub> with 90% capture rate from different sectors

|                             | Additional steam (MJ/kg CO <sub>2</sub> ) | Additional electricity (kWh/kg CO <sub>2</sub> ) | Note                                                                                                                                                                   | Data source   |
|-----------------------------|-------------------------------------------|--------------------------------------------------|------------------------------------------------------------------------------------------------------------------------------------------------------------------------|---------------|
| Power, coal / solid biomass | 0                                         | 0.34                                             | The same fuel input was assumed for the cases with and without carbon capture. The decrease in net power output due to carbon capture was set to be compensated by the | <sup>62</sup> |

|                    |           |      |                                                                                                                                                                                                                                                                                                                                                                                                                                                                                                                                                                                                                                                                                                                                                                                                                                                                                                                                                                                                                                                                                                                                                               |
|--------------------|-----------|------|---------------------------------------------------------------------------------------------------------------------------------------------------------------------------------------------------------------------------------------------------------------------------------------------------------------------------------------------------------------------------------------------------------------------------------------------------------------------------------------------------------------------------------------------------------------------------------------------------------------------------------------------------------------------------------------------------------------------------------------------------------------------------------------------------------------------------------------------------------------------------------------------------------------------------------------------------------------------------------------------------------------------------------------------------------------------------------------------------------------------------------------------------------------|
| Power, natural gas | 0         | 0.54 | grid. This assumption is in line with the existing carbon capture project at Boundary Dam coal-fired power plant. <sup>61</sup>                                                                                                                                                                                                                                                                                                                                                                                                                                                                                                                                                                                                                                                                                                                                                                                                                                                                                                                                                                                                                               |
| Steel, BOF         | BF- 0.68  | 0.36 | Carbon capture was assumed to be performed for flue gases from the steam boiler, the hot stoves, the coke plant, and the lime plant (72% of the total CO <sub>2</sub> emissions of the integrated steel mill). In the reference steel mill without carbon capture, the steam need is satisfied with BOF waste heat boilers, and the electricity need of the integrated mill is partially satisfied by blast furnace gas (BFG) and basic oxygen furnace gas (BOFG). In addition, 76 kWh electricity/tonne steel was assumed to be supplied from the grid. With carbon capture, the site was assumed to be modified so that BFG and BOFG are used to generate steam for MEA regeneration (2.27 MJ steam/kg CO <sub>2</sub> captured) prior to the use of additional fuel. All electricity need (622 kWh/tonne steel) was set to be supplied by the grid. Hence the additional electricity need for carbon capture was calculated as 622-76=546 kWh/tonne steel produced. Considering 1.53 tonne CO <sub>2</sub> capture per tonne steel produced, the additional electricity need for carbon capture became 0.36 kWh/kg CO <sub>2</sub> captured. <sup>63</sup> |
| Steel, EAF         | DRI- 3.48 | 0.17 | Due to data constraint, the same steam and electricity consumption was assumed as capturing from cement kilns, due to the similar CO <sub>2</sub> concentration in flue gas from DRI-EAF steel mills and cement kilns (20vol% on the dry basis). <sup>64, 65</sup>                                                                                                                                                                                                                                                                                                                                                                                                                                                                                                                                                                                                                                                                                                                                                                                                                                                                                            |
| Steel, BOF         | SR- 0     | 0.15 | The Hisarna process was assumed as a typical SR-BOF process, where pure oxygen is fed into the reactor. <sup>66</sup> Assuming pure CO <sub>2</sub> in flue gas, the only additional energy required for carbon capture is the electricity need (0.15 kWh/kg CO <sub>2</sub> captured) <sup>64</sup> for compressing CO <sub>2</sub> to 110 bar for transportation.                                                                                                                                                                                                                                                                                                                                                                                                                                                                                                                                                                                                                                                                                                                                                                                           |
| Cement             | 2.95      | 0.17 | 3.48 MJ/kg CO <sub>2</sub> steam is required for MEA regeneration. <sup>64</sup> 583 MJ waste heat per tonne clinker production was assumed to be recovered for energy use. <sup>67</sup> This value was obtained using an average heat input of 3610 MJ/tonne clinker, and due to data constraints, was used in all regions under both scenarios regardless of the regional average heat input. This was a generous assumption, because with the improvement in energy efficiency by 2050, the amount of waste heat available would be expected to decrease. Steam need for the MEA regeneration was assumed to be supplied by waste heat prior to use of additional fuel. The availability of waste heat was therefore deducted when calculating the additional steam need. <sup>64</sup>                                                                                                                                                                                                                                                                                                                                                                   |
| Kraft pulp         | 0         | 0.37 | Carbon capture was assumed to be performed for flue gases from the recovery boiler, the multi-fuel boiler, and the lime kiln. Kraft pulp mills are net electricity exporters both with and without carbon capture. Therefore, the system is similar to power plants. The same fuel input was assumed for the cases with and without carbon capture. The decrease in net power output due to carbon capture was set to be compensated by the grid. <sup>26</sup>                                                                                                                                                                                                                                                                                                                                                                                                                                                                                                                                                                                                                                                                                               |

## S1.3.2 Environmental impacts of the electricity grid mix

### S1.3.2.1 Climate change impacts of the electricity grid mix

Life cycle assessment (LCA) was performed for the regional electricity grid mix in 2019 and in 2050 under four different scenarios (high-emission scenario without carbon capture, utilization or storage (CCUS), high-emission scenario with full CCUS deployment, low-emission scenario without CCUS, and low-emission scenario with full CCUS deployment). For scenarios with full CCUS deployment, 90% CO<sub>2</sub> capture was assumed to be performed at coal-, natural gas-, and solid biomass-fired power plants.

Ecoinvent 3.8<sup>68</sup> was used as a basis for the life cycle inventories (LCIs) of the regionalized electricity grid mix. As the first step, fuel type match was performed to link all the high voltage electricity generation datasets used in the regional electricity grid mixes (high-voltage) in the ecoinvent database with different electricity generation types as in the “*Extended World Energy Balances*” in IEA’s *World Energy Statistics and Balances*.<sup>7</sup> The dataset match is listed in Table S38. For electricity generation from photovoltaic power stations, it is only possible to feed into medium- or high-voltage grid if the capacity is in the higher kilowatt to megawatt range. However, the future design and sizes of photovoltaic power stations remain uncertain.<sup>69</sup> Ecoinvent assumes that electricity generation from photovoltaic modules feeds into the low voltage grid mix, whilst industries typically use electricity from the median voltage grid mix.<sup>70</sup> This assumption was also applied in 2050 scenarios.

Table S38 Match of high voltage electricity generation datasets in ecoinvent 3.8 with the electricity generation types

| Electricity type | Dataset name as in ecoinvent 3.8, with reference product as “electricity, high voltage”                                                                                                                                                                                                                                                                                                                                                                                                                                                                                                                              |
|------------------|----------------------------------------------------------------------------------------------------------------------------------------------------------------------------------------------------------------------------------------------------------------------------------------------------------------------------------------------------------------------------------------------------------------------------------------------------------------------------------------------------------------------------------------------------------------------------------------------------------------------|
| Coal             | 'electricity production, hard coal',<br>'electricity production, hard coal, conventional',<br>'electricity production, hard coal, supercritical',<br>'electricity production, lignite',<br>'electricity production, peat',<br>'heat and power co-generation, hard coal',<br>'heat and power co-generation, lignite'                                                                                                                                                                                                                                                                                                  |
| Oil              | 'electricity production, oil',<br>'heat and power co-generation, diesel, 200kW electrical, SCR-NOx reduction',<br>'heat and power co-generation, oil'                                                                                                                                                                                                                                                                                                                                                                                                                                                                |
| Natural gas      | 'electricity production, natural gas, 10MW',<br>'electricity production, natural gas, combined cycle power plant',<br>'electricity production, natural gas, conventional power plant',<br>'heat and power co-generation, natural gas, 1MW electrical, lean burn',<br>'heat and power co-generation, natural gas, 200kW electrical, lean burn',<br>'heat and power co-generation, natural gas, 500kW electrical, lean burn',<br>'heat and power co-generation, natural gas, combined cycle power plant, 400MW electrical',<br>'heat and power co-generation, natural gas, conventional power plant, 100MW electrical' |
| Nuclear          | 'electricity production, nuclear, boiling water reactor'<br>'electricity production, nuclear, pressure water reactor',<br>'electricity production, nuclear, pressure water reactor, heavy water moderated'                                                                                                                                                                                                                                                                                                                                                                                                           |
| Solid biomass    | 'heat and power co-generation, wood chips, 2000 kW',<br>'heat and power co-generation, wood chips, 2000 kW, state-of-the-art 2014',<br>'heat and power co-generation, wood chips, 6667 kW',<br>'heat and power co-generation, wood chips, 6667 kW, state-of-the-art 2014'                                                                                                                                                                                                                                                                                                                                            |
| Biogas           | 'heat and power co-generation, biogas, gas engine'                                                                                                                                                                                                                                                                                                                                                                                                                                                                                                                                                                   |
| Hydro            | 'electricity production, hydro, reservoir, alpine region',                                                                                                                                                                                                                                                                                                                                                                                                                                                                                                                                                           |



|                  |                                                                                                                                                                                                                                        |
|------------------|----------------------------------------------------------------------------------------------------------------------------------------------------------------------------------------------------------------------------------------|
|                  | 'electricity production, hydro, reservoir, non-alpine region',<br>'electricity production, hydro, reservoir, tropical region',<br>'electricity production, hydro, run-of-river'                                                        |
| Wind             | 'electricity production, wind, 1-3MW turbine, offshore',<br>'electricity production, wind, 1-3MW turbine, onshore',<br>'electricity production, wind, <1MW turbine, onshore',<br>'electricity production, wind, >3MW turbine, onshore' |
| Other renewables | 'electricity production, deep geothermal',<br>'electricity production, solar thermal parabolic trough, 50 MW',<br>'electricity production, solar tower power plant, 20 MW'                                                             |

With the Brightway2 framework<sup>71</sup> and the Wurst package,<sup>72</sup> the ecoinvent datasets were modified as following:

1. The regional electricity grid mix (high voltage) was updated according to descriptions in Section S1.1.1.1 for 2019, 2050 high-emission scenario and 2050-low-emission scenario (Table S39).

Table S39 High voltage electricity grid mix, by scenario and region

| Scenario                    | Region | High voltage electricity grid mix |     |             |         |               |        |       |      |
|-----------------------------|--------|-----------------------------------|-----|-------------|---------|---------------|--------|-------|------|
|                             |        | Coal                              | Oil | Natural gas | Nuclear | Solid biomass | Biogas | Hydro | Wind |
| 2019                        | CN     | 68%                               | 0%  | 3%          | 5%      | 0%            | 0%     | 18%   | 6%   |
|                             | EU     | 16%                               | 1%  | 19%         | 31%     | 3%            | 2%     | 12%   | 16%  |
|                             | IN     | 72%                               | 0%  | 3%          | 4%      | 0%            | 0%     | 15%   | 5%   |
|                             | JP     | 32%                               | 2%  | 44%         | 9%      | 2%            | 0%     | 10%   | 1%   |
|                             | KR     | 40%                               | 1%  | 27%         | 30%     | 1%            | 0%     | 1%    | 1%   |
|                             | RAF    | 31%                               | 8%  | 40%         | 2%      | 0%            | 0%     | 18%   | 2%   |
|                             | RME    | 0%                                | 14% | 81%         | 1%      | 0%            | 0%     | 3%    | 0%   |
|                             | RU     | 17%                               | 0%  | 44%         | 20%     | 0%            | 0%     | 19%   | 0%   |
|                             | US     | 26%                               | 0%  | 37%         | 22%     | 0%            | 0%     | 7%    | 8%   |
|                             | RoW    | 23%                               | 6%  | 25%         | 6%      | 0%            | 0%     | 35%   | 4%   |
|                             | GLO    | 38%                               | 2%  | 23%         | 12%     | 0%            | 0%     | 18%   | 6%   |
| 2050 high-emission scenario | CN     | 33%                               | 0%  | 5%          | 12%     | 3%            | 2%     | 18%   | 26%  |
|                             | EU     | 1%                                | 0%  | 12%         | 17%     | 6%            | 4%     | 15%   | 45%  |
|                             | IN     | 33%                               | 0%  | 6%          | 10%     | 0%            | 5%     | 13%   | 33%  |
|                             | JP     | 7%                                | 8%  | 16%         | 22%     | 10%           | 0%     | 13%   | 24%  |
|                             | KR     | 0%                                | 0%  | 50%         | 19%     | 6%            | 1%     | 0%    | 24%  |
|                             | RAF    | 9%                                | 3%  | 37%         | 3%      | 3%            | 0%     | 25%   | 19%  |
|                             | RME    | 1%                                | 8%  | 69%         | 5%      | 0%            | 2%     | 2%    | 13%  |
|                             | RU     | 9%                                | 0%  | 44%         | 19%     | 2%            | 1%     | 18%   | 7%   |
|                             | US     | 1%                                | 0%  | 40%         | 14%     | 2%            | 2%     | 10%   | 31%  |
|                             | RoW    | 15%                               | 0%  | 25%         | 5%      | 4%            | 1%     | 31%   | 19%  |
|                             | GLO    | 17%                               | 1%  | 23%         | 10%     | 3%            | 2%     | 19%   | 25%  |
| 2050 low-emission scenario  | CN     | 4%                                | 0%  | 2%          | 15%     | 5%            | 3%     | 19%   | 52%  |
|                             | EU     | 0%                                | 0%  | 0%          | 13%     | 6%            | 4%     | 9%    | 67%  |
|                             | IN     | 2%                                | 0%  | 1%          | 10%     | 0%            | 11%    | 13%   | 62%  |

|     |    |    |     |     |     |    |     |     |
|-----|----|----|-----|-----|-----|----|-----|-----|
| JP  | 3% | 1% | 3%  | 28% | 12% | 0% | 13% | 40% |
| KR  | 0% | 0% | 25% | 14% | 9%  | 1% | 0%  | 51% |
| RAF | 1% | 0% | 3%  | 5%  | 7%  | 0% | 32% | 51% |
| RME | 0% | 0% | 6%  | 9%  | 0%  | 3% | 3%  | 78% |
| RU  | 0% | 0% | 4%  | 33% | 10% | 6% | 27% | 21% |
| US  | 1% | 0% | 1%  | 16% | 4%  | 3% | 7%  | 67% |
| RoW | 0% | 0% | 1%  | 6%  | 7%  | 1% | 34% | 51% |
| GLO | 1% | 0% | 2%  | 12% | 6%  | 3% | 19% | 56% |

2. For all coal-, oil-, natural gas-, solid biomass-, and biogas-fired electricity production datasets, the foreground CO<sub>2</sub> emissions (in kg CO<sub>2</sub> per kWh) and fuel input (in kg fuel per kWh for coal-, oil-, and solid biomass-, and m<sup>3</sup> per kWh for natural gas and biogas-fired electricity) were updated. The calculations were performed based on regionalized power efficiency of non-CHP power plants (described in Section S1.1.1.2 for 2019, and 2050 high- and low-emission scenarios without CCUS). In the case of CHP power plants, the fuel inputs and emissions were allocated between heat and electricity output with the ratio of 1:2.5 (1 MJ heat : 1 MJ electricity).<sup>73</sup> The apparent electrical efficiency was then calculated with the allocated fuel inputs per unit electricity output. For 2050 scenarios with full CCUS deployment (90% capture rate from the flue gas of coal-, natural gas-, and solid biomass-fired power plants), the updated power efficiency of those power plants was calculated with Eqn. (11).

$$\eta_{with\ CCUS} = \eta_{without\ CCUS} - \frac{ELE_{CCUS} \times EF_{fuel} \times 3.6 \times 90\%}{1000} \quad (11)$$

Where  $\eta_{without\ CCUS}$  stands for the apparent power efficiency in the base case without carbon capture (described in Section S1.1.1.2);  $ELE_{CCUS}$  is the power loss due to carbon capture (in kWh/kg CO<sub>2</sub> captured, see Table S37),  $EF_{fuel}$  is the emission factor of the fuel (in tonne CO<sub>2</sub>/TJ fuel, see Table S14). The updated regionalized apparent electrical efficiency was summarized in Table S40. Since no carbon capture was assumed to be performed at oil- or biogas-fired power plants, the power efficiency was set to be the same in scenarios without and with CCUS deployment.

Table S40 Apparent electrical efficiency, by fuel type, scenario and region

| Scenario | Region | Apparent electrical efficiency |     |             |               |        |
|----------|--------|--------------------------------|-----|-------------|---------------|--------|
|          |        | Coal                           | Oil | Natural gas | Solid biomass | Biogas |
| 2019     | CN     | 38%                            | 36% | 53%         |               | 43%    |
|          | EU     | 39%                            | 37% | 53%         | 40%           | 48%    |
|          | IN     | 35%                            | 27% | 41%         |               | 33%    |
|          | JP     | 41%                            | 32% | 52%         | 38%           | 46%    |
|          | KR     | 39%                            | 38% | 53%         | 38%           | 41%    |
|          | RAF    | 32%                            | 19% | 40%         | 28%           | 40%    |
|          | RME    | 37%                            | 33% | 41%         |               | 46%    |
|          | RU     | 41%                            | 41% | 42%         |               | 43%    |
|          | US     | 37%                            | 38% | 50%         | 28%           | 32%    |

|                                                   |     |     |     |     |     |     |
|---------------------------------------------------|-----|-----|-----|-----|-----|-----|
|                                                   | RoW | 35% | 44% | 47% | 23% | 36% |
|                                                   | GLO | 37% | 27% | 47% | 35% | 43% |
| 2050 high-emission scenario, no CCUS deployment   | CN  | 44% | 42% | 55% | 38% | 44% |
|                                                   | EU  | 45% | 42% | 58% | 40% | 54% |
|                                                   | IN  | 40% | 28% | 47% | 38% | 37% |
|                                                   | JP  | 46% | 37% | 59% | 38% | 51% |
|                                                   | KR  | 45% | 28% | 59% | 38% | 46% |
|                                                   | RAF | 37% | 21% | 46% | 33% | 45% |
|                                                   | RME | 43% | 38% | 47% | 38% | 52% |
|                                                   | RU  | 47% | 44% | 48% | 38% | 44% |
|                                                   | US  | 43% | 44% | 57% | 31% | 37% |
|                                                   | RoW | 40% | 44% | 54% | 27% | 41% |
|                                                   | GLO | 43% | 28% | 54% | 38% | 44% |
| 2050 high-emission scenario, full CCUS deployment | CN  | 33% | 42% | 45% | 28% | 44% |
|                                                   | EU  | 35% | 42% | 48% | 29% | 54% |
|                                                   | IN  | 30% | 28% | 38% | 27% | 37% |
|                                                   | JP  | 36% | 37% | 49% | 27% | 51% |
|                                                   | KR  | 32% | 28% | 49% | 27% | 46% |
|                                                   | RAF | 27% | 21% | 37% | 22% | 45% |
|                                                   | RME | 32% | 38% | 37% | 27% | 52% |
|                                                   | RU  | 37% | 44% | 39% | 28% | 44% |
|                                                   | US  | 32% | 44% | 48% | 20% | 37% |
|                                                   | RoW | 30% | 44% | 45% | 16% | 41% |
|                                                   | GLO | 32% | 28% | 44% | 27% | 44% |
| 2050 low-emission scenario, no CCUS deployment    | CN  | 47% | 44% | 55% | 39% | 59% |
|                                                   | EU  | 47% | 45% | 58% | 40% | 59% |
|                                                   | IN  | 46% | 44% | 61% | 39% | 59% |
|                                                   | JP  | 46% | 44% | 61% | 38% | 59% |
|                                                   | KR  | 46% | 44% | 59% | 38% | 58% |
|                                                   | RAF | 46% | 44% | 61% | 39% | 59% |
|                                                   | RME | 46% | 44% | 61% | 39% | 59% |
|                                                   | RU  | 46% | 44% | 52% | 39% | 59% |
|                                                   | US  | 46% | 44% | 60% | 39% | 60% |
|                                                   | RoW | 46% | 44% | 60% | 38% | 59% |
|                                                   | GLO | 47% | 44% | 58% | 39% | 59% |
| 2050 low-emission scenario, full CCUS deployment  | CN  | 37% | 44% | 45% | 28% | 59% |
|                                                   | EU  | 36% | 45% | 48% | 29% | 59% |
|                                                   | IN  | 36% | 44% | 51% | 28% | 59% |
|                                                   | JP  | 36% | 44% | 51% | 27% | 59% |
|                                                   | KR  | 36% | 44% | 49% | 27% | 58% |
|                                                   | RAF | 36% | 44% | 51% | 28% | 59% |
|                                                   | RME | 36% | 44% | 51% | 28% | 59% |
|                                                   | RU  | 36% | 44% | 42% | 28% | 59% |
|                                                   | US  | 36% | 44% | 50% | 28% | 60% |

|     |     |     |     |     |     |
|-----|-----|-----|-----|-----|-----|
| RoW | 35% | 44% | 50% | 27% | 59% |
| GLO | 36% | 44% | 49% | 28% | 59% |

The calculation of fuel input (in kg/kWh or m<sup>3</sup>/kWh) was performed by taking the net calorific values of fuels (in MJ/kg fuel for coal, oil, and solid biomass, and MJ/m<sup>3</sup> for natural gas and biogas) into account. The net calorific values of each coal and oil product is reported in the “*World conversion factors*” in IEA’s *World Energy Statistics and Balances* by country.<sup>7</sup> The weighted regional average of net calorific value of coal and oil was calculated by using the corresponding fuel input to “main activity producer electricity plants” and “main activity producer CHP plants” (in TJ) as weight, which was reported in the “*Extended world energy balances*” in IEA’s *World Energy Statistics and Balances* by country.<sup>7</sup> The products categorized into coal and oil were summarized in Table S41. And the derived regionalized calorific values of coal and oil were summarized in Table S42. Ecoinvent reported the net calorific values of high pressure natural gas and biogas to be 39 and 23 MJ/m<sup>3</sup>, respectively.<sup>68</sup> For solid biomass, 12.5 MJ/kg calorific value of wood chips with 30% moisture (equivalent to 18 MJ/kg on the dry mass) reported by Forest Research<sup>74</sup> was used in this study. Due to a lack of regionalized data, those values were used for all regions.

Table S41 Products by fuel type (coal and oil)

| Fuel type | Products as in <i>World conversion factors</i> and <i>Extended world energy balances</i> <sup>7</sup>                                                           |
|-----------|-----------------------------------------------------------------------------------------------------------------------------------------------------------------|
| Coal      | anthracite, coking coal, other bituminous coal, sub-bituminous coal, lignite, BKB, oil shale and oil sands, petroleum coke, coke oven coke, peat, peat products |
| Oil       | crude oil, kerosene type jet fuel excl. biofuels, gas/diesel oil excl. biofuels, fuel oil, naphtha, bitumen, other oil products                                 |

Table S42 Weighted average calorific values of coal and oil, by region

| Region | Weighted average calorific values (MJ/kg) |     |
|--------|-------------------------------------------|-----|
|        | Coal                                      | Oil |
| CN     | 21                                        | 42  |
| EU     | 12                                        | 41  |
| IN     | 17                                        | 42  |
| JP     | 25                                        | 41  |
| KR     | 23                                        | 43  |
| RAF    | 23                                        | 41  |
| RME    | 20                                        | 42  |
| RU     | 20                                        | 40  |
| US     | 21                                        | 41  |
| RoW    | 18                                        | 42  |
| GLO    | 20                                        | 42  |

The foreground CO<sub>2</sub> emissions were then calculated with Eqn. (2). The climate change effect of biogenic carbon is closely related to the rotation period of the biomass. Assuming the primary solid biomass is harvested directly from managed forests that have an average rotation period of 90 years for energy generation,<sup>75</sup> a Global Warming Potential (GWP100) of 0.39 kg CO<sub>2</sub>-eq. was assigned to one kilogram of biogenic CO<sub>2</sub> emission from solid biomass.<sup>76</sup>

The final updated fuel inputs into power plants and the corresponding CO<sub>2</sub> emissions under different scenarios are summarized in Table S43 and Table S44.

Table S43 Updated fuel input into power plants, by fuel type, scenario and region

| Scenario                                          | Region | Fuel inputs   |              |                                   |                        |                              |
|---------------------------------------------------|--------|---------------|--------------|-----------------------------------|------------------------|------------------------------|
|                                                   |        | Coal (kg/kWh) | Oil (kg/kWh) | Natural gas (m <sup>3</sup> /kWh) | Solid biomass (kg/kWh) | Biogas (m <sup>3</sup> /kWh) |
| 2019                                              | CN     | 0.45          | 0.24         | 0.17                              | 0.57                   | 0.37                         |
|                                                   | EU     | 0.75          | 0.22         | 0.17                              | 0.51                   | 0.33                         |
|                                                   | IN     | 0.62          | 0.23         | 0.22                              | 0.57                   | 0.48                         |
|                                                   | JP     | 0.35          | 0.27         | 0.18                              | 0.53                   | 0.35                         |
|                                                   | KR     | 0.40          | 0.22         | 0.17                              | 0.52                   | 0.39                         |
|                                                   | RAF    | 0.49          | 0.26         | 0.23                              | 0.71                   | 0.34                         |
|                                                   | RME    | 0.50          | 0.46         | 0.23                              | 0.57                   | 0.40                         |
|                                                   | RU     | 0.45          | 0.33         | 0.22                              | 0.57                   | 0.37                         |
|                                                   | US     | 0.46          | 0.23         | 0.18                              | 0.73                   | 0.50                         |
|                                                   | RoW    | 0.57          | 0.20         | 0.20                              | 0.86                   | 0.44                         |
| GLO                                               | 0.49   | 0.32          | 0.20         | 0.57                              | 0.37                   |                              |
| 2050 high-emission scenario, no CCUS deployment   | CN     | 0.39          | 0.20         | 0.17                              | 0.51                   | 0.36                         |
|                                                   | EU     | 0.65          | 0.21         | 0.16                              | 0.50                   | 0.29                         |
|                                                   | IN     | 0.54          | 0.30         | 0.20                              | 0.53                   | 0.42                         |
|                                                   | JP     | 0.31          | 0.24         | 0.16                              | 0.53                   | 0.31                         |
|                                                   | KR     | 0.36          | 0.30         | 0.16                              | 0.53                   | 0.34                         |
|                                                   | RAF    | 0.43          | 0.23         | 0.20                              | 0.62                   | 0.30                         |
|                                                   | RME    | 0.43          | 0.40         | 0.20                              | 0.53                   | 0.35                         |
|                                                   | RU     | 0.39          | 0.20         | 0.19                              | 0.51                   | 0.36                         |
|                                                   | US     | 0.40          | 0.20         | 0.16                              | 0.64                   | 0.43                         |
|                                                   | RoW    | 0.50          | 0.20         | 0.17                              | 0.75                   | 0.39                         |
| GLO                                               | 0.43   | 0.31          | 0.17         | 0.53                              | 0.36                   |                              |
| 2050 high-emission scenario, full CCUS deployment | CN     | 0.51          | 0.20         | 0.20                              | 0.71                   | 0.36                         |
|                                                   | EU     | 0.86          | 0.21         | 0.19                              | 0.69                   | 0.29                         |
|                                                   | IN     | 0.72          | 0.30         | 0.25                              | 0.74                   | 0.42                         |
|                                                   | JP     | 0.40          | 0.24         | 0.19                              | 0.74                   | 0.31                         |
|                                                   | KR     | 0.57          | 0.30         | 0.19                              | 0.74                   | 0.34                         |
|                                                   | RAF    | 0.59          | 0.23         | 0.25                              | 0.92                   | 0.30                         |
|                                                   | RME    | 0.57          | 0.40         | 0.25                              | 0.74                   | 0.35                         |
|                                                   | RU     | 0.50          | 0.20         | 0.24                              | 0.71                   | 0.36                         |
|                                                   | US     | 0.53          | 0.20         | 0.19                              | 0.99                   | 0.43                         |
|                                                   | RoW    | 0.67          | 0.20         | 0.21                              | 1.27                   | 0.39                         |
| GLO                                               | 0.57   | 0.31          | 0.21         | 0.74                              | 0.36                   |                              |
| 2050 low-emission scenario, no CCUS deployment    | CN     | 0.36          | 0.20         | 0.17                              | 0.51                   | 0.27                         |
|                                                   | EU     | 0.63          | 0.20         | 0.16                              | 0.50                   | 0.27                         |
|                                                   | IN     | 0.47          | 0.19         | 0.15                              | 0.52                   | 0.27                         |
|                                                   | JP     | 0.31          | 0.20         | 0.15                              | 0.53                   | 0.27                         |

|                                                  |     |      |      |      |      |      |
|--------------------------------------------------|-----|------|------|------|------|------|
|                                                  | KR  | 0.33 | 0.19 | 0.16 | 0.53 | 0.27 |
|                                                  | RAF | 0.35 | 0.20 | 0.15 | 0.51 | 0.27 |
|                                                  | RME | 0.40 | 0.20 | 0.15 | 0.52 | 0.27 |
|                                                  | RU  | 0.39 | 0.20 | 0.18 | 0.51 | 0.27 |
|                                                  | US  | 0.37 | 0.20 | 0.15 | 0.52 | 0.26 |
|                                                  | RoW | 0.44 | 0.20 | 0.15 | 0.53 | 0.27 |
|                                                  | GLO | 0.39 | 0.20 | 0.16 | 0.52 | 0.27 |
| 2050 low-emission scenario, full CCUS deployment | CN  | 0.46 | 0.20 | 0.20 | 0.71 | 0.27 |
|                                                  | EU  | 0.82 | 0.20 | 0.19 | 0.69 | 0.27 |
|                                                  | IN  | 0.61 | 0.19 | 0.18 | 0.72 | 0.27 |
|                                                  | JP  | 0.40 | 0.20 | 0.18 | 0.74 | 0.27 |
|                                                  | KR  | 0.43 | 0.19 | 0.19 | 0.74 | 0.27 |
|                                                  | RAF | 0.45 | 0.20 | 0.18 | 0.71 | 0.27 |
|                                                  | RME | 0.52 | 0.20 | 0.18 | 0.72 | 0.27 |
|                                                  | RU  | 0.51 | 0.20 | 0.22 | 0.71 | 0.27 |
|                                                  | US  | 0.48 | 0.20 | 0.18 | 0.72 | 0.26 |
|                                                  | RoW | 0.57 | 0.20 | 0.18 | 0.74 | 0.27 |
|                                                  | GLO | 0.51 | 0.20 | 0.19 | 0.72 | 0.27 |

Table S44 Updated CO<sub>2</sub> emission factors accountable for climate change impacts of electricity production, by fuel type, scenario and region

| Scenario                                        | Region | CO <sub>2</sub> emission factors accountable for climate change impacts (kg CO <sub>2</sub> -eq./kWh) |      |             |               |        |
|-------------------------------------------------|--------|-------------------------------------------------------------------------------------------------------|------|-------------|---------------|--------|
|                                                 |        | Coal                                                                                                  | Oil  | Natural gas | Solid biomass | Biogas |
| 2019                                            | CN     | 0.89                                                                                                  | 0.75 | 0.38        | 0.40          | 0      |
|                                                 | EU     | 0.90                                                                                                  | 0.69 | 0.38        | 0.35          | 0      |
|                                                 | IN     | 0.98                                                                                                  | 0.73 | 0.49        | 0.40          | 0      |
|                                                 | JP     | 0.83                                                                                                  | 0.87 | 0.39        | 0.37          | 0      |
|                                                 | KR     | 0.88                                                                                                  | 0.73 | 0.38        | 0.37          | 0      |
|                                                 | RAF    | 1.05                                                                                                  | 0.82 | 0.50        | 0.49          | 0      |
|                                                 | RME    | 0.93                                                                                                  | 1.45 | 0.50        | 0.40          | 0      |
|                                                 | RU     | 0.85                                                                                                  | 1.02 | 0.48        | 0.40          | 0      |
|                                                 | US     | 0.93                                                                                                  | 0.72 | 0.40        | 0.51          | 0      |
|                                                 | RoW    | 0.98                                                                                                  | 0.62 | 0.43        | 0.60          | 0      |
|                                                 | GLO    | 0.92                                                                                                  | 1.00 | 0.43        | 0.40          | 0      |
| 2050 high-emission scenario, no CCUS deployment | CN     | 0.78                                                                                                  | 0.65 | 0.37        | 0.36          | 0      |
|                                                 | EU     | 0.78                                                                                                  | 0.65 | 0.35        | 0.35          | 0      |
|                                                 | IN     | 0.85                                                                                                  | 0.95 | 0.43        | 0.37          | 0      |
|                                                 | JP     | 0.74                                                                                                  | 0.75 | 0.34        | 0.37          | 0      |
|                                                 | KR     | 0.80                                                                                                  | 0.99 | 0.34        | 0.37          | 0      |
|                                                 | RAF    | 0.91                                                                                                  | 0.72 | 0.44        | 0.43          | 0      |
|                                                 | RME    | 0.81                                                                                                  | 1.27 | 0.43        | 0.37          | 0      |
|                                                 | RU     | 0.74                                                                                                  | 0.63 | 0.42        | 0.36          | 0      |
|                                                 | US     | 0.81                                                                                                  | 0.62 | 0.35        | 0.45          | 0      |
| RoW                                             | 0.86   | 0.62                                                                                                  | 0.37 | 0.52        | 0             |        |

|                                                   |     |      |      |      |       |   |
|---------------------------------------------------|-----|------|------|------|-------|---|
|                                                   | GLO | 0.80 | 0.97 | 0.38 | 0.37  | 0 |
| 2050 high-emission scenario, full CCUS deployment | CN  | 0.10 | 0.65 | 0.04 | -0.64 | 0 |
|                                                   | EU  | 0.10 | 0.65 | 0.04 | -0.63 | 0 |
|                                                   | IN  | 0.11 | 0.95 | 0.05 | -0.68 | 0 |
|                                                   | JP  | 0.10 | 0.75 | 0.04 | -0.68 | 0 |
|                                                   | KR  | 0.11 | 0.99 | 0.04 | -0.67 | 0 |
|                                                   | RAF | 0.13 | 0.72 | 0.06 | -0.84 | 0 |
|                                                   | RME | 0.11 | 1.27 | 0.05 | -0.68 | 0 |
|                                                   | RU  | 0.10 | 0.63 | 0.05 | -0.64 | 0 |
|                                                   | US  | 0.11 | 0.62 | 0.04 | -0.90 | 0 |
|                                                   | RoW | 0.12 | 0.62 | 0.05 | -1.16 | 0 |
|                                                   | GLO | 0.11 | 0.97 | 0.05 | -0.68 | 0 |
| 2050 low-emission scenario, no CCUS deployment    | CN  | 0.73 | 0.62 | 0.37 | 0.36  | 0 |
|                                                   | EU  | 0.76 | 0.61 | 0.35 | 0.35  | 0 |
|                                                   | IN  | 0.74 | 0.61 | 0.33 | 0.36  | 0 |
|                                                   | JP  | 0.74 | 0.64 | 0.33 | 0.37  | 0 |
|                                                   | KR  | 0.73 | 0.62 | 0.34 | 0.37  | 0 |
|                                                   | RAF | 0.74 | 0.62 | 0.33 | 0.36  | 0 |
|                                                   | RME | 0.75 | 0.62 | 0.33 | 0.36  | 0 |
|                                                   | RU  | 0.75 | 0.63 | 0.39 | 0.36  | 0 |
|                                                   | US  | 0.75 | 0.62 | 0.34 | 0.36  | 0 |
|                                                   | RoW | 0.76 | 0.62 | 0.34 | 0.37  | 0 |
|                                                   | GLO | 0.74 | 0.62 | 0.35 | 0.36  | 0 |
| 2050 low-emission scenario, full CCUS deployment  | CN  | 0.09 | 0.62 | 0.04 | -0.64 | 0 |
|                                                   | EU  | 0.10 | 0.61 | 0.04 | -0.63 | 0 |
|                                                   | IN  | 0.10 | 0.61 | 0.04 | -0.66 | 0 |
|                                                   | JP  | 0.10 | 0.64 | 0.04 | -0.68 | 0 |
|                                                   | KR  | 0.09 | 0.62 | 0.04 | -0.67 | 0 |
|                                                   | RAF | 0.10 | 0.62 | 0.04 | -0.64 | 0 |
|                                                   | RME | 0.10 | 0.62 | 0.04 | -0.66 | 0 |
|                                                   | RU  | 0.10 | 0.63 | 0.05 | -0.64 | 0 |
|                                                   | US  | 0.10 | 0.62 | 0.04 | -0.66 | 0 |
|                                                   | RoW | 0.10 | 0.62 | 0.04 | -0.67 | 0 |
|                                                   | GLO | 0.09 | 0.62 | 0.04 | -0.66 | 0 |

With the aforementioned updates, the climate change impacts of regional electricity grid mix was calculated for various scenarios (Table S45).

Table S45 Modeled climate change impacts of regional high voltage electricity grid, by scenario and region

| climate change impacts of high voltage electricity grid mix (kg CO <sub>2</sub> -eq./kWh) |       |                                                 |                                                   |                                                |                                                  |
|-------------------------------------------------------------------------------------------|-------|-------------------------------------------------|---------------------------------------------------|------------------------------------------------|--------------------------------------------------|
| Region                                                                                    | 2019  | 2050 high-emission scenario, no CCUS deployment | 2050 high-emission scenario, full CCUS deployment | 2050 low-emission scenario, no CCUS deployment | 2050 low-emission scenario, full CCUS deployment |
| CN                                                                                        | 0.825 | 0.392                                           | 0.130                                             | 0.088                                          | 0.002                                            |

|     |       |       |        |       |        |
|-----|-------|-------|--------|-------|--------|
| EU  | 0.457 | 0.212 | 0.051  | 0.043 | -0.008 |
| IN  | 0.917 | 0.408 | 0.134  | 0.058 | 0.041  |
| JP  | 0.299 | 0.103 | -0.001 | 0.049 | -0.017 |
| KR  | 0.597 | 0.261 | 0.053  | 0.108 | -0.053 |
| RAF | 0.474 | 0.360 | 0.123  | 0.111 | -0.007 |
| RME | 0.532 | 0.233 | 0.017  | 0.147 | -0.024 |
| RU  | 0.633 | 0.313 | 0.061  | 0.066 | -0.024 |
| US  | 0.668 | 0.452 | 0.196  | 0.042 | 0.023  |
| RoW | 0.454 | 0.307 | 0.042  | 0.062 | -0.024 |
| GLO | 0.589 | 0.321 | 0.084  | 0.067 | -0.008 |

### SI.3.2.2 Particulate Matter (PM)-related health impacts of the electricity grid mix

PM-related health impacts of the electricity grid mix was assumed to come from the release of the pollutants such as primary fine particulate matter, sulfur dioxide, nitrogen oxides and ammonia during the combustion of fossil fuels (coal, oil, and natural gas) and biofuels (solid biomass and biogases) onsite the corresponding power plants. The regionalized PM-related impacts factors of fossil-fueled power plants from Oberschelp *et al.* (in DALY/MJ fuel input) calculated from the energy balances and the characterization factors there were used in this study.<sup>77</sup> The impact factors of solid biomass-fueled power plants were calculated with the emission factors of wood with electrostatic precipitators reported in the *Draft Revisions to AP-42 (Compilation of Air Emissions Factors)* from the United States Environmental Protection Agency<sup>78</sup> and the model from Oberschelp *et al.*<sup>79</sup> with the following assumptions: (1) the locations and power generation amount from primary solid biomass were assumed to be the same as for coal-fired power plants; (2) the stack height was assumed to be 50 meter; (3) the flue gas exit velocity was assumed to be 20 meter per second. Due to a lack of data, the impacts factors of biogas-fueled power plants were assumed to be the same as natural gas-fueled power plants. These impacts factors were combined with the power efficiency (Table S40) and the electricity grid mix (Table S39) under different scenarios to derive the PM-related health impacts factors of the regional high voltage electricity grid mix (Table S46).

Table S46 Modeled PM-related health impacts of regional high voltage electricity grid mix, by scenario and region

| Region | PM-related health impacts of high voltage electricity grid mix (DALY/kWh) |                                                 |                                                   |                                                |                                                  |
|--------|---------------------------------------------------------------------------|-------------------------------------------------|---------------------------------------------------|------------------------------------------------|--------------------------------------------------|
|        | 2019                                                                      | 2050 high-emission scenario, no CCUS deployment | 2050 high-emission scenario, full CCUS deployment | 2050 low-emission scenario, no CCUS deployment | 2050 low-emission scenario, full CCUS deployment |
| CN     | 1.92E-08                                                                  | 1.15E-08                                        | 1.52E-08                                          | 6.45E-09                                       | 8.68E-09                                         |
| EU     | 1.48E-08                                                                  | 4.72E-09                                        | 6.17E-09                                          | 2.94E-09                                       | 3.96E-09                                         |
| IN     | 1.90E-07                                                                  | 7.69E-08                                        | 1.03E-07                                          | 5.07E-09                                       | 6.18E-09                                         |
| JP     | 1.43E-08                                                                  | 6.26E-09                                        | 8.31E-09                                          | 5.41E-09                                       | 7.33E-09                                         |
| KR     | 2.13E-08                                                                  | 2.44E-08                                        | 2.96E-08                                          | 1.44E-08                                       | 1.96E-08                                         |
| RAF    | 1.27E-08                                                                  | 7.78E-09                                        | 9.92E-09                                          | 3.24E-09                                       | 4.31E-09                                         |
| RME    | 2.25E-08                                                                  | 9.77E-09                                        | 1.31E-08                                          | 1.17E-08                                       | 1.61E-08                                         |
| RU     | 4.27E-08                                                                  | 1.58E-08                                        | 1.88E-08                                          | 2.26E-09                                       | 2.90E-09                                         |
| US     | 5.00E-08                                                                  | 2.68E-08                                        | 2.77E-08                                          | 4.76E-10                                       | 5.52E-10                                         |



|     |          |          |          |          |          |
|-----|----------|----------|----------|----------|----------|
| RoW | 4.23E-08 | 2.12E-08 | 2.92E-08 | 5.90E-09 | 8.07E-09 |
| GLO | 3.38E-08 | 1.94E-08 | 2.54E-08 | 5.21E-09 | 7.01E-09 |

### S1.3.3 Environmental impacts of steam production

Additional fuel is required to produce steam for carbon capture in cement kilns and steel mills. Different scenarios were assumed for the fuel source:

- 1) the steam boiler uses the same fuel as the main production activity (this means e.g., coal for BF-BOF steel mills and natural gas for DRI-EAF steel mills), with 90% thermal efficiency;
- 2) the steam boiler uses only natural gas as fuel, with 90% thermal efficiency;
- 3) the steam is produced from electrode vessels that uses grid electricity with 99% thermal efficiency.<sup>80</sup>

#### S1.3.3.1 Climate change impacts of steam production

For climate change impacts, the background datasets of fuel supply from ecoinvent 3.8 were used in this study. Where regional data are missing, the dataset for the Rest of the World (RoW) was used. Table S47 summarizes names and locations of the applied ecoinvent datasets. The foreground greenhouse gas emission factors of fuel combustion were from the *IPCC Guidelines for National Greenhouse Gas Inventories*.<sup>10</sup> The climate change impacts from background processes of fuel supply and foreground processes of fuel combustion was combined with the net calorific values of the fuels (described in Section S1.3.2) and a 90% thermal efficiency of the steam boiler for the GWP calculation of the steam (in kg CO<sub>2</sub>-eq./MJ fuel). The results were summarized in

Table S48.

Table S47 Ecoinvent datasets of fuel supply used in this study, by fuel type and region

| Fuel                             | Coal                                       | Oil                        | Natural gas                           | Solid biomass                                    |
|----------------------------------|--------------------------------------------|----------------------------|---------------------------------------|--------------------------------------------------|
| Dataset name as in ecoinvent 3.8 | Market for hard coal                       | Market for heavy fuel oil  | Market for natural gas, high pressure | Market for wood chips, wet, measured as dry mass |
| Regions in this study            | Regions of the dataset as in ecoinvent 3.8 |                            |                                       |                                                  |
| CN                               | CN                                         | RoW                        | RoW                                   | RoW                                              |
| EU                               | Europe without Russia and Turkey           | Europe without Switzerland | RoW                                   | Europe without Switzerland                       |
| IN                               | IN                                         | IN                         | RoW                                   | RoW                                              |
| JP                               | RoW                                        | RoW                        | JP                                    | RoW                                              |
| KR                               | RoW                                        | RoW                        | RoW                                   | RoW                                              |
| RAF                              | RoW                                        | RoW                        | RoW                                   | RoW                                              |
| RME                              | RoW                                        | RoW                        | RoW                                   | RoW                                              |
| RU                               | RU                                         | RoW                        | RU                                    | RoW                                              |
| US                               | RNA                                        | RoW                        | US                                    | RoW                                              |
| RoW                              | RoW                                        | RoW                        | RoW                                   | RoW                                              |

Table S48 Modeled climate change impacts of regional fuel combustion, by fuel type and region

| Region | climate change impacts of fuel combustion (kg CO <sub>2</sub> -eq./MJ) |       |             |               |
|--------|------------------------------------------------------------------------|-------|-------------|---------------|
|        | Coal                                                                   | Oil   | Natural gas | Solid biomass |
| CN     | 0.121                                                                  | 0.083 | 0.063       | 0.042         |
| EU     | 0.123                                                                  | 0.083 | 0.063       | 0.041         |
| IN     | 0.110                                                                  | 0.086 | 0.063       | 0.042         |
| JP     | 0.110                                                                  | 0.083 | 0.075       | 0.042         |
| KR     | 0.112                                                                  | 0.083 | 0.063       | 0.042         |
| RAF    | 0.112                                                                  | 0.083 | 0.063       | 0.042         |
| RME    | 0.115                                                                  | 0.083 | 0.063       | 0.042         |
| RU     | 0.111                                                                  | 0.083 | 0.071       | 0.042         |
| US     | 0.104                                                                  | 0.083 | 0.068       | 0.042         |
| RoW    | 0.117                                                                  | 0.083 | 0.063       | 0.042         |

### S1.3.3.2 Particulate Matter (PM)-related health impacts of steam production

For PM-related health impacts, only the impacts related to fuel combustion were considered. Other relevant considerations were described in Section S1.3.2.2.

## S1.4 Bottom-up case studies: development and application of CO<sub>2</sub>-feedstock sourcing strategies in China and Middle East

### S1.4.1 Locations and capacities of individual CO<sub>2</sub> suppliers and consumers

Site specific information including latitude, longitude and production capacity were collected for chemical manufacturing sites (as CO<sub>2</sub> consumers) and cement kilns, steel mills, coal- and natural gas-fired power plants (as CO<sub>2</sub> suppliers) were collected from various sources as summarized in Table S49.

Table S49 Data sources of locations and capacities of individual CO<sub>2</sub> suppliers and consumers

|                                                                   | China                                                                            | Middle East                                                                      |
|-------------------------------------------------------------------|----------------------------------------------------------------------------------|----------------------------------------------------------------------------------|
| <b>CO<sub>2</sub> consumers</b><br>(chemical manufacturing sites) | Manual collection from public available information sources (see Appendix table) | Manual collection from public available information sources (see Appendix table) |
| <b>CO<sub>2</sub> suppliers</b>                                   |                                                                                  |                                                                                  |
| Cement kilns                                                      | Manual collection from public available information sources (see Appendix table) | 77                                                                               |
| Steel mills                                                       | 77                                                                               | 77, 81                                                                           |
| Coal-fired power plants                                           | 82                                                                               | 82                                                                               |
| Natural gas-fired power plants                                    | 83                                                                               | 83                                                                               |

### S1.4.2 Elimination strategy of coal-fired power plants in China and natural gas-fired power plants in Middle East

IEA predicted the electricity generation and the corresponding electrical capacity by fuel type and region in its *World Energy Outlook 2020*.<sup>3</sup> With these two factors, the estimated average annual operation hours were calculated to be 2065 hours for coal-fired power plants in China and 2529 hours for natural gas-fired power plants in Middle East under the Sustainable Development Scenario in 2040. Due to a lack of more representative estimations, those two values were assumed to be the average operation hours of the respective power plants under the low-emission scenario in 2050 in this study. As described in Section S1.1.1.1, total electricity generation from coal would be 449 TWh in China and total electricity generation from natural gas would be 124 TWh in Middle East under the low-emission scenario in 2050. The remaining electrical capacity was then back-calculated to be 218 GW coal-fired power plants in China and 49 GW natural gas-fired power plants in Middle East, reducing from 1307 GW coal-fired power plants in China and 316 GW natural gas-fired power plants in Middle East that are in operation, construction, or planning today.<sup>82, 83</sup>

Therefore, a simplified phase-out strategy was developed according to Cui *et al.*<sup>84</sup> to match the abovementioned remaining capacity. Specifically, only technical attributes including age, size, technology, and application as reported by Global Energy Monitor<sup>82, 83</sup> were taken into account. Profitability and Environmental impacts were not considered due to data constraint. However, these two factors are also to a large extent correlated with the technical attributes. A scoring system was designed by Cui *et al.*<sup>84</sup> for coal-fired power plants (Table S50) and was adapted for natural gas-fired power plants (Table S51). The power generation units with higher total scores were set to be kept until the total capacity was reached. The remaining units were assumed to be phased out and were not included in the case study.

Table S50 Score assignment to coal-fired power plants in China, based on Cui *et al.*<sup>84</sup>

|             | Data Type    | Score Assignment    |                    |                       |                  |
|-------------|--------------|---------------------|--------------------|-----------------------|------------------|
| Age         | Quantitative | [min, max]<br>[0,1] |                    |                       |                  |
| Size        | Categorical  | <300MW<br>0.25      | >=300MW<br>0.5     | >=600MW<br>0.75       | >=1000MW<br>1    |
| Technology  | Categorical  | Other<br>0.25       | Subcritical<br>0.5 | Supercritical<br>0.75 | Ultra-Super<br>1 |
| Application | Categorical  | Self-Use<br>0.5     | CHP<br>1           | Power<br>1            |                  |

Table S51 Score assignment to natural gas-fired power plants in the Middle East

|     | Data Type    | Score Assignment    |
|-----|--------------|---------------------|
| Age | Quantitative | [min, max]<br>[0,1] |

|             |             |               |             |                |         |
|-------------|-------------|---------------|-------------|----------------|---------|
| Size        | Categorical | <200MW        | >=200MW     | >=400MW        | >=600MW |
|             |             | 0.25          | 0.5         | 0.75           | 1       |
| Technology  | Categorical | Steam turbine | Gas turbine | Combined cycle |         |
|             |             | 0.5           | 0.75        | 1              |         |
| Application | Categorical | Non-CHP       | CHP         |                |         |
|             |             | 0.5           | 1           |                |         |

### S1.4.3 Environmental impacts of truck transportation

Climate change impacts of truck transportation (in kg CO<sub>2</sub>-eq. per tonne kilometer) was obtained based on the dataset “transport, freight, lorry 16-32 metric ton, EURO3 | RoW” in ecoinvent 3.8. The inventory from this dataset was then combined with the regionalized characterization factors for ground transport in China and Middle East from Oberschelp *et al.*<sup>79</sup> to calculate the total PM-related health impacts of truck transportation (in DALY per tonne kilometer). The considered inventories include direct emissions of primary particulate matter with a diameter below 2.5 μm (PM<sub>2.5</sub>), sulfur dioxide (SO<sub>2</sub>), nitrogen oxides (NO<sub>x</sub>), and ammonia (NH<sub>3</sub>), and indirect emissions of these substances from road wear, brake wear, and tyre wear.

### S1.4.4 Environmental impacts of pipeline transportation

The dataset for CO<sub>2</sub> pipeline transportation was modified based on the dataset for natural gas transportation in ecoinvent 3.8: “market for transport, pipeline, onshore, long distance, natural gas | RoW”. The inventory is shown in Table S52.

Table S52 LCI data of CO<sub>2</sub> transportation with pipeline (1 tonne kilometer)

| Technosphere inputs |      |                                                                         |              |                                                                               |
|---------------------|------|-------------------------------------------------------------------------|--------------|-------------------------------------------------------------------------------|
| Amount              | Unit | Activity                                                                | Location     | Comments                                                                      |
| 2.59E-9             | km   | Market for pipeline, natural gas, long distance, high capacity, onshore | GLO          | Amount from ecoinvent 3.8, proxy for CO <sub>2</sub> pipeline infrastructure  |
| 0.0725              | kWh  | Market group for electricity, medium voltage                            | CN / RME     | Amount from ecoinvent 3.8, electricity need for CO <sub>2</sub> recompression |
| Biosphere flows     |      |                                                                         |              |                                                                               |
| Amount              | Unit | Flow name                                                               | Compartments | Comments                                                                      |
| 0.00026             | kg   | Carbon dioxide, fossil                                                  | air          | Amount from Wildbolz, <sup>85</sup> CO <sub>2</sub> leakage                   |

## S2 Additional results

### S2.1 Environmental impacts of carbon capture – sensitivity analysis

Various combinations of electricity grid mix (2019, 2050 without CCUS deployment, 2050 with full CCUS deployment) and steam sources (mixed fuel boilers, natural gas boilers, and electrode vessels) are applied to the Environmental-Merit-Order (EMO) curves of 1 kg CO<sub>2</sub> captured from different industries as part of the sensitivity analysis. The results are shown in Fig. S2 and Fig. S3 for the sectoral rankings in terms of climate change impacts, and Fig. S4 and Fig. S5 for the sectoral rankings in terms of PM-related health impacts.

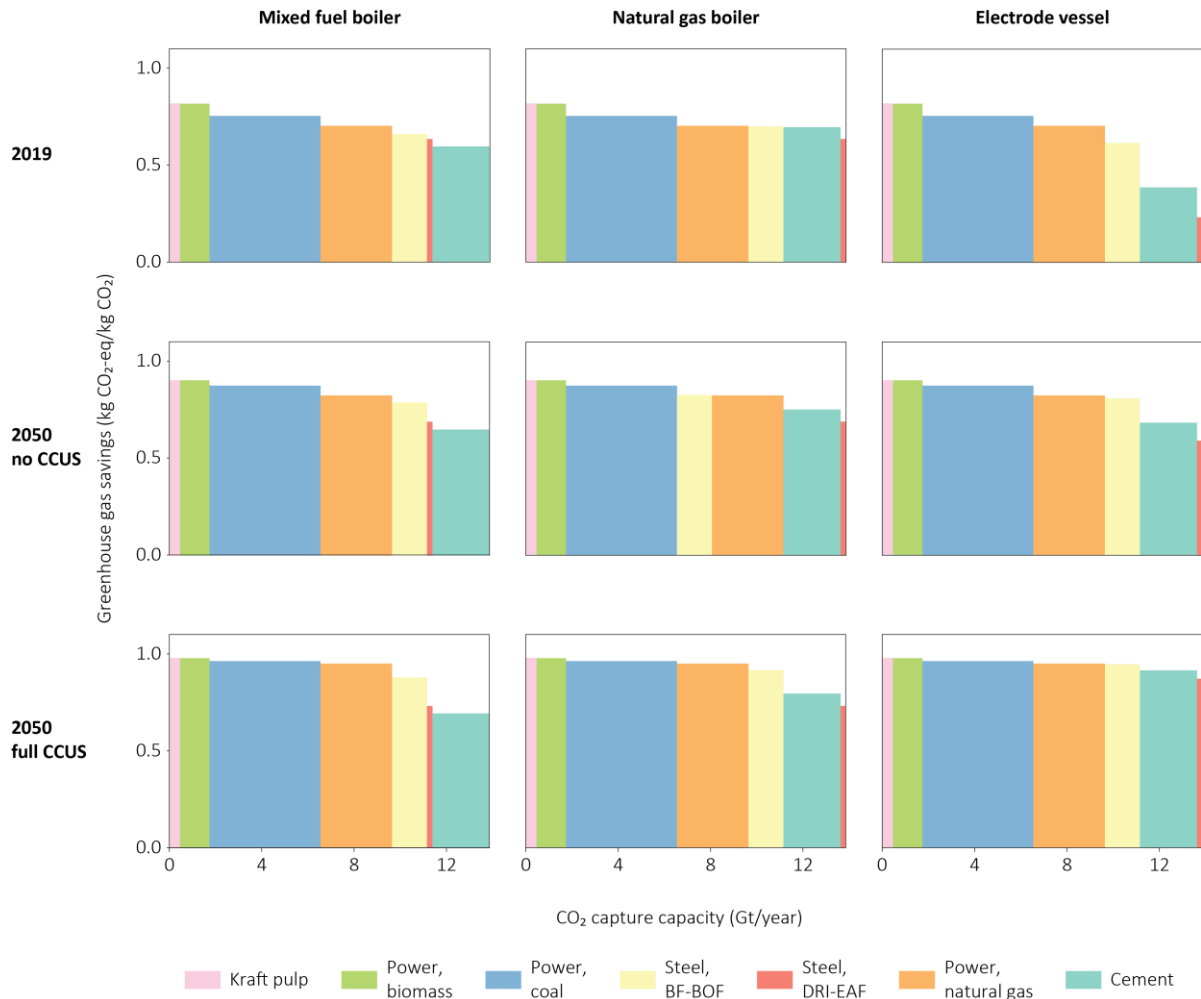

Fig. S2 Environmental-merit-order curve for GHG savings of 1 kg CO<sub>2</sub> captured from different industries under the high-emission scenario with different combinations of electricity and steam sources

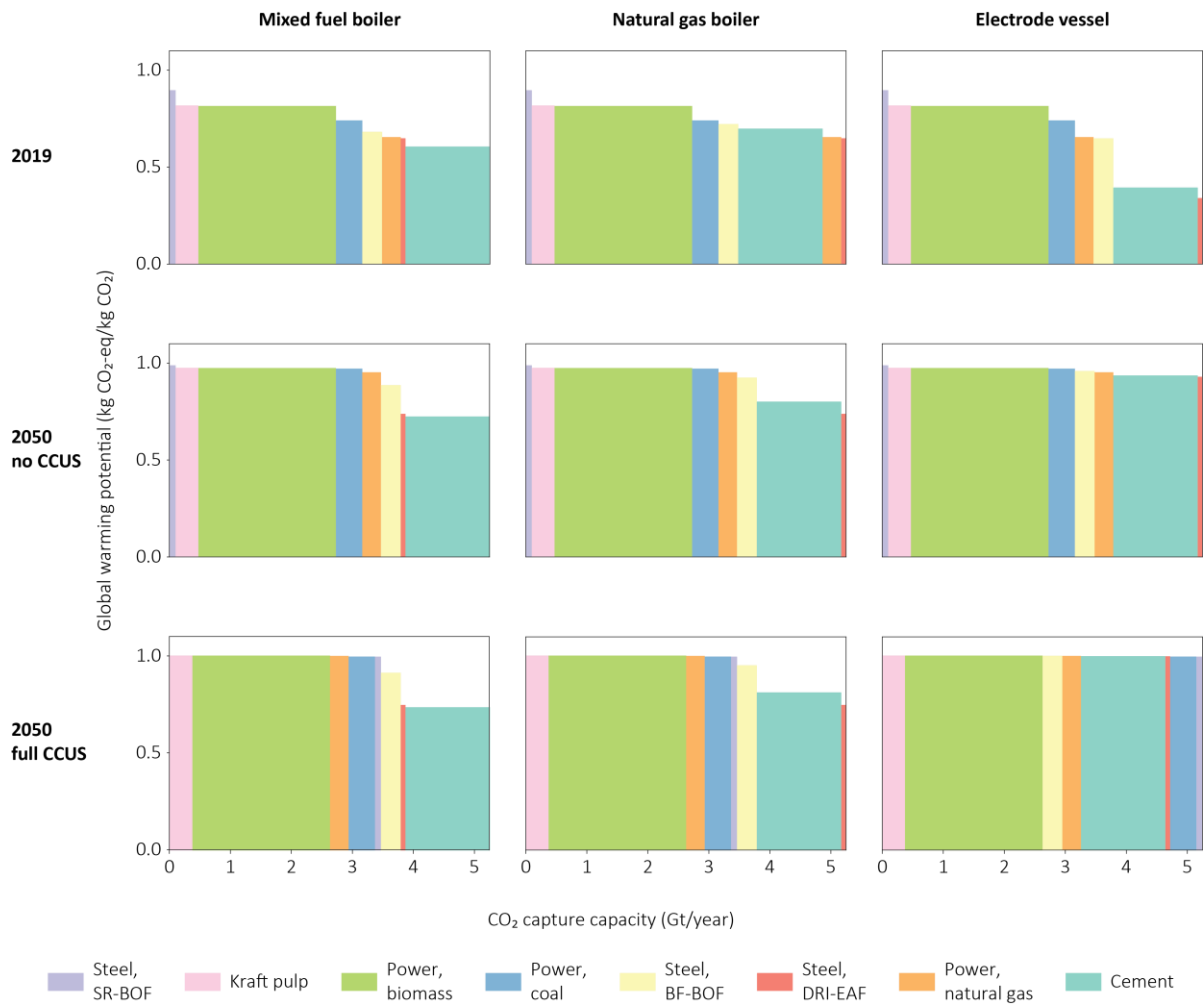

Fig. S3 Environmental-merit-order curve for GHG savings of 1 kg CO<sub>2</sub> captured from different industries under the low-emission scenario with different combinations of electricity and steam sources

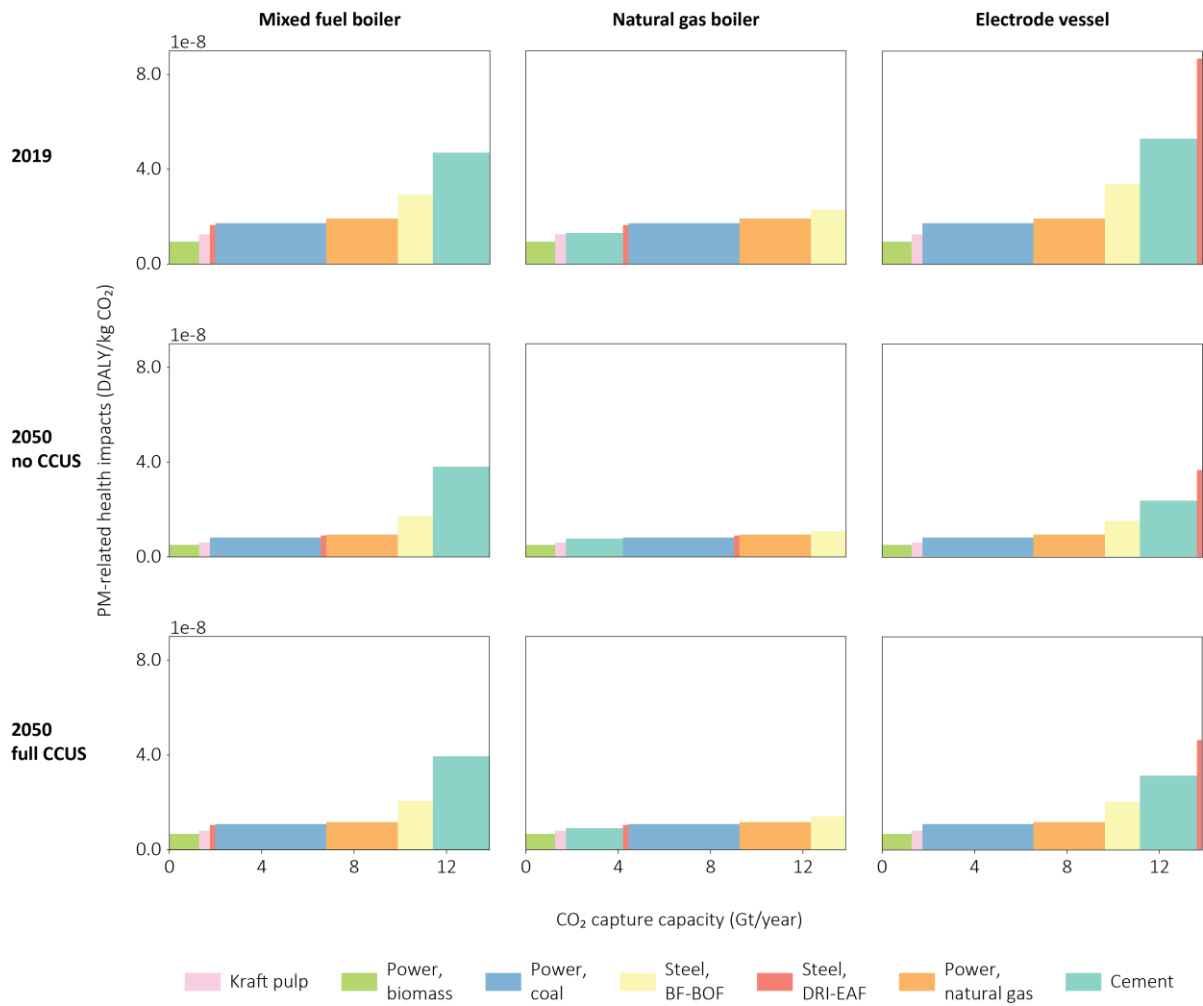

Fig. S4 Environmental-merit-order curve for PM-related health impacts of 1 kg CO<sub>2</sub> captured from different industries under the high-emission scenario with different combinations of electricity and steam sources

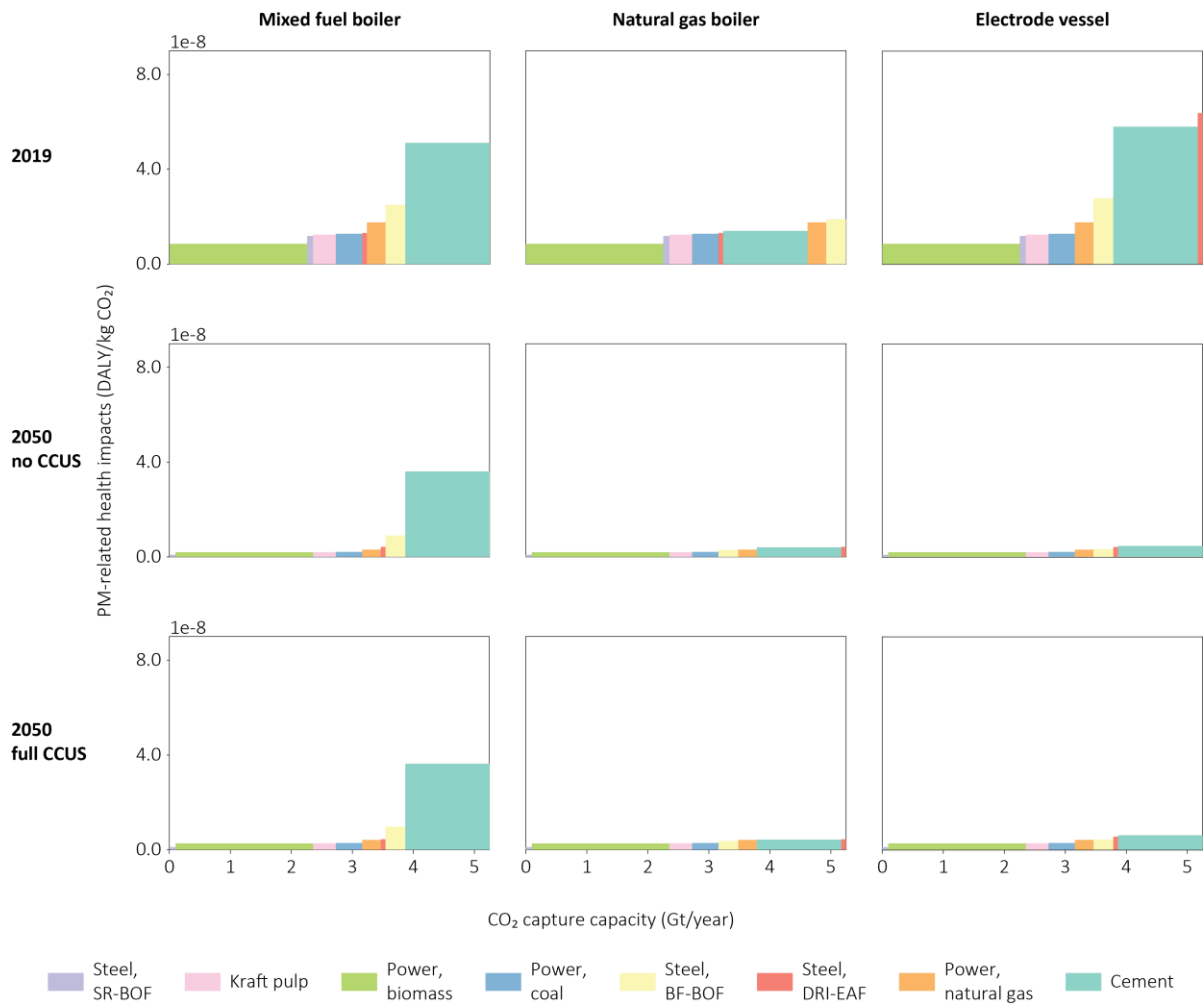

Fig. S5 Environmental-merit-order curve for PM-related health impacts of 1 kg CO<sub>2</sub> captured from different industries under the low-emission scenario with different combinations of electricity and steam sources



## S2.2 Bottom-up case studies: optimization of CO<sub>2</sub> supply to chemical manufacturing sites in China

### S2.2.1 Basic scenario

Table S53 Optimization results from the basic scenario

| Item                                                                 | Unit                   | When minimizing total climate change impacts | When minimizing total health impacts |
|----------------------------------------------------------------------|------------------------|----------------------------------------------|--------------------------------------|
| Total transportation distance:                                       | km                     | 64146                                        | 53385                                |
| Average transportation distance to each chemical manufacturing site: | km                     | 224                                          | 182                                  |
| Total climate change impacts from carbon capture:                    | kt CO <sub>2</sub> -eq | 206101                                       | 218153                               |
| Total climate change impacts from transportation:                    | kt CO <sub>2</sub> -eq | 21278                                        | 17243                                |
| Total climate change impacts                                         | kt CO <sub>2</sub> -eq | 227379                                       | 235395                               |
| Total health impacts from carbon capture:                            | DALY                   | 4819                                         | 5115                                 |
| Total health impacts from transportation:                            | DALY                   | 3006                                         | 2436                                 |
| Total health impacts                                                 | DALY                   | 7824                                         | 7550                                 |

## S2.2.2 Sensitivity analysis 1: CO<sub>2</sub> transportation with pipelines

### Environmental-merit-order curves of carbon capture

(a) Greenhouse gas savings

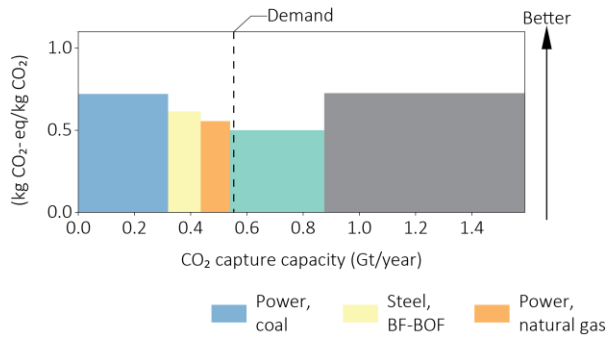

(b) PM-related health impacts

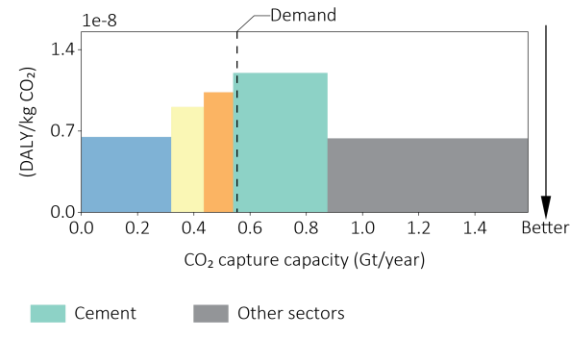

### CO<sub>2</sub> supply chain optimization by minimizing

(c) Greenhouse gas emissions

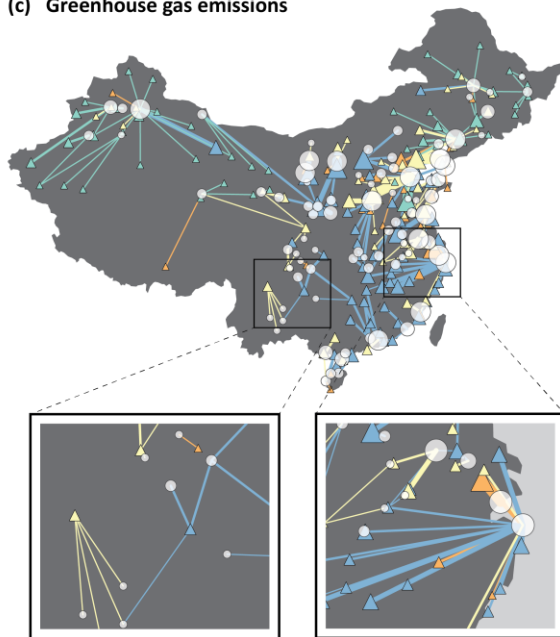

(d) PM-related health impacts

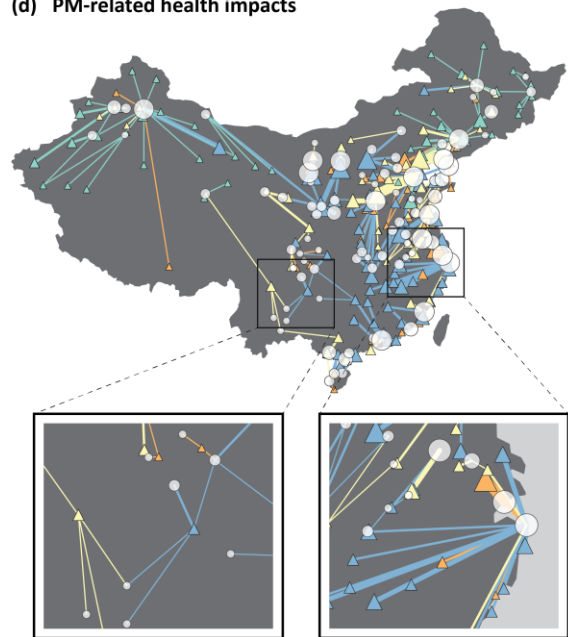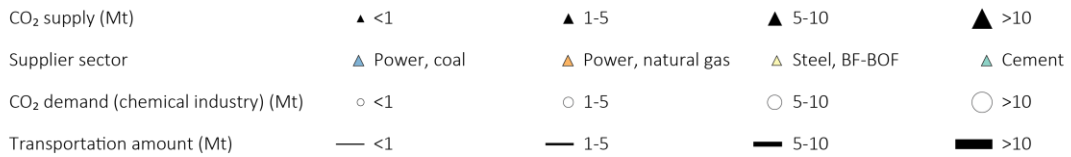

Fig. S6 (a) and (b): GHG savings and PM-related health impacts of carbon capture from different sectors in China. (c) and (d): CO<sub>2</sub> supply chain optimization in China under the low-emission scenario in 2050 with pipeline transportation by minimizing the total regional GHG emissions and the total regional PM-related health impacts.

Table S54 Optimization results from sensitivity analysis 1: CO<sub>2</sub> transportation with pipelines

| Item                                                                 | Unit                   | When minimizing total climate change impacts | When minimizing total health impacts |
|----------------------------------------------------------------------|------------------------|----------------------------------------------|--------------------------------------|
| Total transportation distance:                                       | km                     | 68971                                        | 73150                                |
| Average transportation distance to each chemical manufacturing site: | km                     | 227                                          | 233                                  |
| Total climate change impacts from carbon capture:                    | kt CO <sub>2</sub> -eq | 205934                                       | 205759                               |
| Total climate change impacts from transportation:                    | kt CO <sub>2</sub> -eq | 8917                                         | 9163                                 |
| Total climate change impacts                                         | kt CO <sub>2</sub> -eq | 214851                                       | 214922                               |
| Total health impacts from carbon capture:                            | DALY                   | 4812                                         | 4805                                 |
| Total health impacts from transportation:                            | DALY                   | 193                                          | 198                                  |
| Total health impacts                                                 | DALY                   | 5005                                         | 5003                                 |

### S2.2.3 Sensitivity analysis 2: solid biomass-fired power plants included as potential CO<sub>2</sub> suppliers

**Environmental-merit-order curves of carbon capture**

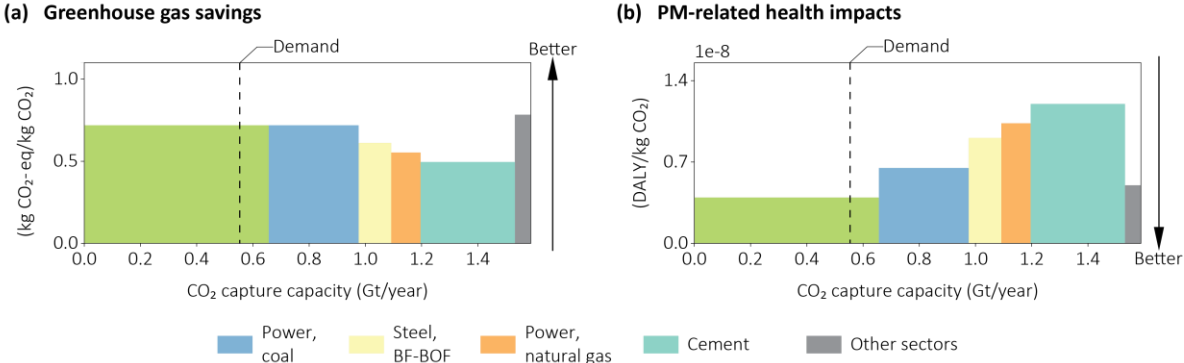

**CO<sub>2</sub> supply chain optimization by minimizing**

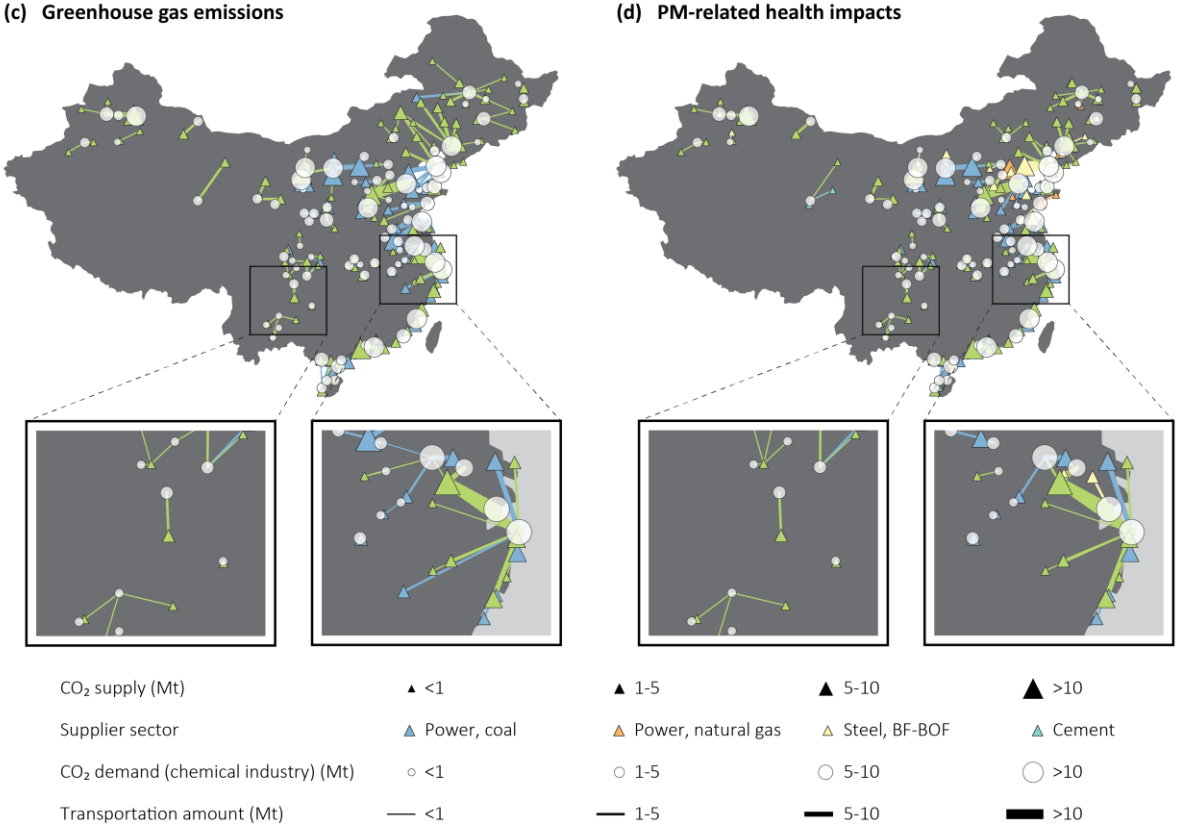

Fig. S7 (a) and (b): GHG savings and PM-related health impacts of carbon capture from different sectors in China. (c) and (d): CO<sub>2</sub> supply chain optimization in China under the low-emission scenario in 2050 with truck transportation and with biomass-fired power plants as potential suppliers by minimizing the total regional GHG emissions and the total regional PM-related health impacts.

Table S55 Optimization results from sensitivity analysis 2: solid biomass-fired power plants included as potential CO<sub>2</sub> suppliers

| Item                                                                 | Unit                   | When minimizing total climate change impacts | When minimizing total health impacts |
|----------------------------------------------------------------------|------------------------|----------------------------------------------|--------------------------------------|
| Total transportation distance:                                       | km                     | 30063                                        | 25026                                |
| Average transportation distance to each chemical manufacturing site: | km                     | 170                                          | 131                                  |
| Total climate change impacts from carbon capture:                    | kt CO <sub>2</sub> -eq | 170437                                       | 181267                               |
| Total climate change impacts from transportation:                    | kt CO <sub>2</sub> -eq | 16188                                        | 12462                                |
| Total climate change impacts                                         | kt CO <sub>2</sub> -eq | 186625                                       | 193729                               |
| Total health impacts from carbon capture:                            | DALY                   | 3954                                         | 4214                                 |
| Total health impacts from transportation:                            | DALY                   | 2287                                         | 1760                                 |
| Total health impacts                                                 | DALY                   | 6240                                         | 5975                                 |

## References

1. IEA, *Technology roadmap: low-carbon transition in the cement industry*, International Energy Agency, Paris, France, 2018.
2. IEA, *Iron and steel technology roadmap: towards more sustainable steelmaking*, International Energy Agency, Paris, France, 2020.
3. IEA, *World energy outlook 2020*, International Energy Agency, Paris, France, 2020.
4. IEA, *World energy outlook 2021*, International Energy Agency, Paris, France, 2021.
5. IEA, *Net zero by 2050: A roadmap for the global energy sector*, International Energy Agency, Paris, France, 2021.
6. H. Kim, H. McJeon, D. Jung, H. Lee, C. Bergero and J. Eom, [Under review], 2022.
7. IEA, *World energy statistics and balances*, International Energy Agency, 2021.
8. T. Lecomte, J. Félix Ferrería de la Fuente, F. Neuwahl, M. Canova, A. Pinasseau, I. Jankov, T. Brinkmann, S. Roudier and L. Delgado Sancho, *Best Available Techniques (BAT) reference document for large combustion plants*, the Joint Research Centre of the European Commission (JRC), Luxembourg, Luxembourg, 2017.
9. IPCC, *IPCC special report on carbon capture and storage*, International Panel on Climate Change, Cambridge, United Kingdom and New York, NY, USA, 2005.
10. IPCC, *IPCC guidelines for national greenhouse gas inventories*, International Panel on Climate Change, Hayama, Japan, 2006.
11. World Steel Association, *Steel statistical yearbook 2020*, Brussels, Belgium, 2020.
12. P. Wang, M. Ryberg, Y. Yang, K. S. Feng, S. Kara, M. Hauschild and W. Q. Chen, *Nat. Commun.*, 2021, **12**.
13. Material Economics, *Industrial transformation 2050: Pathways to net-zero emissions from EU heavy industry*, Stockholm, Sweden, 2019.
14. A. Hasanbeigi and C. Springer, *How clean is the U.S. steel industry? An international benchmarking of energy and CO<sub>2</sub> intensities*, Global Efficiency Intelligence, San Francisco, CA, USA, 2019.
15. N. A. Ryan, S. A. Miller, S. J. Skerlos and D. R. Cooper, *Environ. Sci. Technol.*, 2020, **54**, 14598-14608.
16. USGS, *Mineral commodity summaries 2021*, U.S. Geological Survey, Reston, VA, 2021.
17. Korea Cement Association (KCA), Monthly production, [http://www.cement.or.kr/english/stati/mm\\_pro\\_view.asp](http://www.cement.or.kr/english/stati/mm_pro_view.asp), (accessed October, 2021).
18. The European Cement Association (CEMBUREAU), Key facts & figures, <https://cembureau.eu/about-our-industry/key-facts-figures/>, (accessed October, 2021).
19. Energy Transition Commission, *China 2050: a fully developed rich zero-carbon economy*, Beijing, China, 2019.
20. J. H. Xu, T. Fleiter, Y. Fan and W. Eichhammer, *Appl. Energy*, 2014, **130**, 592-602.
21. F. Schorcht, I. Kourti, B. M. Scalet, S. Roudier and L. D. Sancho, *Best available techniques (BAT) reference document for the production of cement, lime and magnesium oxide*, the Joint Research Centre of the European Commission (JRC), Luxembourg, Luxembourg, 2013.
22. T. P. Hills, M. G. Sceats and P. S. Fennell, in *Rsc Energy Environ S*, eds. M. Bui and N. M. Dowell, The Royal Society of Chemistry, Croydon, UK, 2020, DOI: 10.1039/9781788012744, ch. 10, pp. 315-352.

23. Food and Agriculture Organization of the United Nations (FAO), Forestry production and trade, <http://www.fao.org/faostat/en/#data/FO/>, (accessed October, 2021).
24. J. Buongiorno, *Sustainability-Basel*, 2021, **13**.
25. International Energy Agency (IEA), Pulp and Paper, <https://www.iea.org/reports/pulp-and-paper>, (accessed March, 2022).
26. IEAGHG, *Techno-economic evaluation of retrofitting CCS in a market pulp and integrated pulp and board mill*, IEA Greenhouse Gas R&D Programme, Cheltenham, UK, 2016.
27. U.S. Department of Energy, *Bandwidth study on energy use and potential energy saving opportunities in U.S. pulp and paper manufacturing*, 2015.
28. China Nitrogen Fertilizer Industry Association (CNFIA), Nitrogen fertilizer production and operation report in 2019 (in Chinese), [http://www.cnfia.com.cn/c/cn/news/2020-05/08/news\\_12258.html](http://www.cnfia.com.cn/c/cn/news/2020-05/08/news_12258.html), (accessed February, 2022).
29. International Fertilizer Association (IFA), Urea stats 2008-2019, <https://www.ifastat.org/supply/Nitrogen%20Products/Urea>, (accessed October, 2021).
30. Food and Agriculture Organization of the United Nations (FAO), Fertilizers by product, <https://www.fao.org/faostat/en/#data/RFB>, (accessed October, 2021).
31. USGS, Nitrogen statistics and information, <https://www.usgs.gov/centers/nmic/nitrogen-statistics-and-information>, (accessed October, 2021).
32. M. Chakravarty, *How will methanol survive the oversupply?*, Argus Media group, Taipei, 2019.
33. Methanol Institute, Methanol price and supply/demand, <https://www.methanol.org/methanol-price-supply-demand/>, (accessed February, 2022).
34. Ministry of Chemicals and Fertilizers of India, *Chemicals and petrochemicals statistics at a glance – 2019*, New Delhi, India, 2020.
35. statista, Methanol production in the United States from 1990 to 2019, <https://www.statista.com/statistics/974802/us-methanol-production-volume/>, (accessed October, 2021).
36. the National Bureau of Statistics of the People’s Republic of China, Annual national statistics (in Chinese) (2021), <https://data.stats.gov.cn/easyquery.htm?cn=C01>, (accessed October, 2021).
37. Petrochemicals Europe, European market overview, <https://www.petrochemistry.eu/about-petrochemistry/petrochemicals-facts-and-figures/european-market-overview/>, (accessed October, 2021).
38. Chemicals & Petrochemicals Manufacturers’ Association of India, India demand supply, <http://cpmaindia.com>, (accessed October, 2021).
39. the Ministry of Economy, Trade and Industry of Japan, Yearbook of current production statistics: chemical industry, [https://www.meti.go.jp/statistics/tyo/seidou/result/ichiran/resourceData/02\\_kagaku/nenpo/h2dbb2020k.xls](https://www.meti.go.jp/statistics/tyo/seidou/result/ichiran/resourceData/02_kagaku/nenpo/h2dbb2020k.xls), (accessed October, 2021).
40. Statistics Korea, Volume of production, shipment, inventory, domestic demand and exports,

- [https://kosis.kr/statHtml/statHtml.do?orgId=101&tblId=DT\\_1F01512&conn\\_path=I2&language=en](https://kosis.kr/statHtml/statHtml.do?orgId=101&tblId=DT_1F01512&conn_path=I2&language=en), (accessed October, 2021).
41. ESI Africa, Global ethylene capacity to see considerable growth of 27%, <https://www.esi-africa.com/industry-sectors/business-and-markets/global-ethylene-capacity-to-see-considerable-growth-of-27/>, (accessed October, 2021).
  42. IHS Markit, Petrochemical capacity in China and Middle East: Growth amid challenges, <https://ihsmarkit.com/research-analysis/petrochemical-capacity-growth-in-china-middle-east.html>, (accessed October, 2021).
  43. GPCA, *GPCA annual report 2020: Transitioning into the new reality*, Gulf Petrochemicals and Chemicals Association, Dubai, United Arab Emirates, 2020.
  44. Eurasian Chemical Market International Magazine, Production and market of ethylene in Russia and the CIS countries, <http://www.chemmarket.info/en/home/article/3286/>. (accessed October, 2021).
  45. statista, Production of selected chemicals and plastics in the United States in 2019, by type, <https://www.statista.com/statistics/299725/total-us-plastics-and-chemicals-shipments-by-type/>, (accessed October, 2021).
  46. statista, Ethylene demand and production capacity worldwide from 2015 to 2022, <https://www.statista.com/statistics/1246694/ethylene-demand-capacity-forecast-worldwide/>, (accessed October, 2021).
  47. CHYXX, Chinese propylene market and the operation of key companies in 2019 (in Chinese), <https://www.chyxx.com/industry/202008/888750.html>, (accessed October, 2021).
  48. INDEXBOX, Propylene market, <https://app.indexbox.io/report/290122/>, (accessed October, 2021).
  49. Deloitte, *The future of petrochemicals: growth surrounded by uncertainty*, 2019.
  50. statista, Propylene demand and production capacity worldwide from 2015 to 2022, <https://www.statista.com/statistics/1246689/propylene-demand-capacity-forecast-worldwide/>, (accessed October, 2021).
  51. CPCIF, *CPCIF annual report 2019*, China Petroleum and Chemical Industry Federation, Beijing, China, 2019.
  52. huaon, The production, demand, and import analysis of para-xylene in China in 2019 (in Chinese), <https://www.huaon.com/channel/trend/670361.html>, (accessed October, 2021).
  53. P. G. Levi and J. M. Cullen, *Environ Sci Technol*, 2018, **52**, 1725-1734.
  54. Aromatics Online, Facts and figures, <https://www.aromaticsonline.eu/aromatics/facts-and-figures>, (accessed October, 2021).
  55. IEA, *The future of petrochemicals*, International Energy Agency, Paris, France, 2018.
  56. W. Hall, T. Spencer, G. Renjith and S. Dayal, *The Potential Role of Hydrogen in India: A pathway for scaling-up low carbon hydrogen across the economy*, The Energy and Resources Institute (TERI), New Delhi, India, 2020.
  57. X. Zhang, E. A. Davidson, D. L. Mauzerall, T. D. Searchinger, P. Dumas and Y. Shen, *Nature*, 2015, **528**, 51-59.
  58. D. Saygin and D. Gielen, *Energies*, 2021, **14**.
  59. A. M. Bazzanella and F. Ausfelder, *Low carbon energy and feedstock for the European chemical industry*, DECHEMA, Frankfurt am Main, Germany, 2017.



60. L. Y. Zhang, Q. Shen, M. Q. Wang, N. N. Sun, W. Wei, Y. Lei and Y. J. Wang, *J. Clean. Prod.*, 2019, **210**, 1131-1140.
61. International CCS Knowledge Centre, *The Shand CCS feasibility study (public report)*, Regina, SK, Canada, 2018.
62. IEAGHG, *Towards zero emissions: CCS in power plants using higher capture rates or biomass*, IEA Greenhouse Gas R&D Programme, Cheltenham, UK, 2019.
63. IEAGHG, *Iron and steel CCS study (techno-economics integrated steel mill)*, IEA Greenhouse Gas R&D Programme, Cheltenham, UK, 2013.
64. K. Volkart, C. Bauer and C. Boulet, *Int. J. Greenh. Gas Control*, 2013, **16**, 91-106.
65. Lockwood Greene, *Ironmaking process alternatives screening study*, U.S. Department of Energy, 2000.
66. Tata Steel, *HIsarna: building a sustainable steel industry*, 2020.
67. IFC, *Waste heat recovery for the cement sector: market and supplier analysis*, International Finance Corporation, 2014.
68. G. Wernet, C. Bauer, B. Steubing, J. Reinhard, E. Moreno-Ruiz and B. Weidema, *Int J Life Cycle Ass*, 2016, **21**, 1218-1230.
69. ecoinvent, *ecoinvent 3.8 dataset documentation*, 2021.
70. ecoinvent, Electricity - ecoinvent, <https://ecoinvent.org/the-ecoinvent-database/sectors/electricity/>, (accessed February, 2022).
71. C. Mutel, *Journal of Open Source Software*, 2017, **2**, 236.
72. L. Vandepaer and T. Gibon, *Int J Life Cycle Ass*, 2018, **23**, 970-977.
73. BSI, *PAS 2050: Specification for the assessment of the life cycle greenhouse gas emissions of goods and services*, British Standards Institution, London, UK, 2011.
74. Forest Research, Typical calorific values of fuels, <https://www.forestresearch.gov.uk/tools-and-resources/fthr/biomass-energy-resources/reference-biomass/facts-figures/typical-calorific-values-of-fuels/>, (accessed February, 2022).
75. F. Pittau, F. Krause, G. Lumia and G. Habert, *Build. Environ.*, 2018, **129**, 117-129.
76. F. Cherubini, G. P. Peters, T. Berntsen, A. H. Stromman and E. Hertwich, *Glob. Change Biol. Bioenergy*, 2011, **3**, 413-426.
77. C. Oberschelp, S. Pfister and S. Hellweg, unpublished work.
78. U.S. EPA, *Draft revisions to AP-42 Chapter 1, Section 6 - wood residue combustion in boilers* U.S. Environmental Protection Agency, NC, United States, 2021.
79. C. Oberschelp, S. Pfister and S. Hellweg, *Environ. Sci. Technol.*, 2020, **54**, 16028-16038.
80. Forschungsstelle für Energiewirtschaft e.V., *Kurzstudie Power-to-X. Ermittlung des Potenzials von PtX-Anwendungen für die Netzplanung der deutschen ÜNB (in German)*, Munich, Germany, 2017.
81. Global Energy Monitor, Global Steel Plant Tracker, <https://globalenergymonitor.org/projects/global-steel-plant-tracker/>, (accessed January, 2022).
82. Global Energy Monitor, Global Coal Plant Tracker, <https://globalenergymonitor.org/projects/global-coal-plant-tracker/>, (accessed January, 2022).

83. Global Energy Monitor, Global Gas Plant Tracker, <https://globalenergymonitor.org/projects/global-gas-plant-tracker/>, (accessed January, 2022).
84. R. Y. Cui, N. Hultman, D. Cui, H. McJeon, S. Yu, M. R. Edwards, A. Sen, K. Song, C. Bowman, L. Clarke, J. Kang, J. Lou, F. Yang, J. Yuan, W. Zhang and M. Zhu, *Nat. Commun.*, 2021, **12**, 1468.
85. C. Wildbolz, Diploma Thesis, ETH Zurich, 2007.
