# Supplementary material for: Net-zero transition of the global chemical industry with CO2-feedstock by 2050: feasible yet challenging
Source: Royal Society of Chemistry journal article supplement (doi:10.1039/d2gc03047k), 2022-11-30
Supplement: d2gc03047k2.xlsx [file d2gc03047k2.xlsx]

## Sheet: CNChemicalPlants
CODE	CHEMICAL	CAPACITY_kT_per_year	CAPACITY_SOURCE	LAT	LONG	SITE_LOCATION_TYPE
CNC001	Urea	520	http://pdf.dfcfw.com/pdf/H3_AP201907101338389191_1.pdf	35.7643	114.999	Exact
CNC002	Urea	1750	http://pdf.dfcfw.com/pdf/H3_AP201907101338389191_1.pdf	39.0553	109.493	Exact
CNC003	Urea	300	http://pdf.dfcfw.com/pdf/H3_AP201907101338389191_1.pdf	31.806	117.242	Approximate
CNC004	Urea	520	https://gas.in-en.com/html/gas-3156449.shtml	43.6203	87.7137	Exact
CNC005	Urea	520	https://new.qq.com/omn/20210302/20210302A0EED700.html	29.9537	116.611	Exact
CNC006	Urea	600	https://www.feidoodoo.com/article-13842.html	25.7561	103.884	Exact
CNC007	Urea	200	http://www.jhcel.cn/view/mainpc/1/16/view/814.html	23.7277	103.246	Exact
CNC008	Urea	2000	https://m.nbd.com.cn/articles/2021-08-16/1877311.html	29.4098	106.486	Exact
CNC009	Urea	520	https://www.oilchem.net/	44.115	87.7657	Approximate
CNC010	Urea	400	https://www.oilchem.net/	34.9778	117.285	Exact
CNC011	Urea	300	https://www.oilchem.net/	41.7869	125.821	Exact
CNC012	Urea	600	https://www.oilchem.net/	45.3147	124.485	Exact
CNC013	Urea	450	http://pdf.dfcfw.com/pdf/H3_AP201907101338389191_1.pdf	39.8809	117.78	Exact
CNC014	Urea	520	https://www.feidoodoo.com/article-13933.html	30.6986	104.334	Exact
CNC015	Urea	450	https://www.oilchem.net/	30.8352	104.15	Approximate
CNC016	Urea	700	https://www.oilchem.net/	28.7748	105.38	Approximate
CNC017	Urea	600	http://pdf.dfcfw.com/pdf/H3_AP201907101338389191_1.pdf	31.1012	104.406	Approximate
CNC018	Urea	300	http://pdf.dfcfw.com/pdf/H3_AP201907101338389191_1.pdf	31.4497	104.775	Approximate
CNC019	Urea	300	https://www.feidoodoo.com/article-14609.html	30.8463	105.379	Exact
CNC020	Urea	520	https://www.svwpa.com/steel/infodetail/infodetail?infoId=15055207&productId=009&columnId=jyd	39.1839	110.852	Approximate
CNC021	Urea	700	https://www.oilchem.net/	38.4445	106.114	Exact
CNC022	Urea	1320	http://pdf.dfcfw.com/pdf/H3_AP201907101338389191_1.pdf	38.4829	106.071	Exact
CNC023	Urea	800	http://pdf.dfcfw.com/pdf/H3_AP201907101338389191_1.pdf	33.0621	115.282	Exact
CNC024	Urea	300	http://pdf.dfcfw.com/pdf/H3_AP201907101338389191_1.pdf	30.8927	117.759	Exact
CNC025	Urea	1200	http://pdf.dfcfw.com/pdf/H3_AP201907101338389191_1.pdf	32.9272	115.864	Approximate
CNC026	Urea	800	http://pdf.dfcfw.com/pdf/H3_AP201907101338389191_1.pdf	35.5572	114.577	Exact
CNC027	Urea	2200	https://www.oilchem.net/	37.4648	116.262	Exact
CNC028	Urea	1800	https://www.oilchem.net/	37.0507	119.074	Exact
CNC029	Urea	800	https://www.oilchem.net/	35.7524	116.795	Exact
CNC030	Urea	500	https://www.oilchem.net/	35.7524	116.795	Exact
CNC031	Urea	3800	https://www.oilchem.net/	35.8782	116.467	Exact
CNC032	Urea	140	https://www.oilchem.net/	36.8926	117.443	Exact
CNC033	Urea	180	https://www.oilchem.net/	35.7883	118.605	Exact
CNC034	Urea	1250	https://www.oilchem.net/	36.4627	116.012	Exact
CNC035	Urea	1800	http://pdf.dfcfw.com/pdf/H3_AP201907101338389191_1.pdf	33.7978	116.012	Exact
CNC036	Urea	1500	http://pdf.dfcfw.com/pdf/H3_AP201907101338389191_1.pdf	35.4708	112.604	Exact
CNC037	Urea	300	http://pdf.dfcfw.com/pdf/H3_AP201907101338389191_1.pdf	38.3449	112.063	Exact
CNC038	Urea	3000	http://pdf.dfcfw.com/pdf/H3_AP201907101338389191_1.pdf	35.6541	112.888	Exact
CNC039	Urea	1200	http://pdf.dfcfw.com/pdf/H3_AP201907101338389191_1.pdf	35.7594	112.844	Exact
CNC040	Urea	1200	http://pdf.dfcfw.com/pdf/H3_AP201907101338389191_1.pdf	35.7567	112.905	Exact
CNC041	Urea	300	http://pdf.dfcfw.com/pdf/H3_AP201907101338389191_1.pdf	36.3601	112.852	Exact
CNC042	Urea	300	http://pdf.dfcfw.com/pdf/H3_AP201907101338389191_1.pdf	35.4665	112.598	Exact
CNC043	Urea	520	https://www.oilchem.net/	44.2312	86.302	Exact
CNC044	Urea	800	http://www.cs.com.cn/ssgs/gsxw/201210/t20121010_3616822.html	41.787	86.1623	Approximate
CNC045	Urea	210	https://www.oilchem.net/	44.0793	88.589	Exact
CNC046	Urea	700	https://www.oilchem.net/	44.3963	84.9081	Approximate
CNC047	Urea	700	https://www.oilchem.net/	44.7863	88.8594	Exact
CNC048	Urea	520	https://www.oilchem.net/	41.7531	83.0182	Exact
CNC049	Urea	900	http://pdf.dfcfw.com/pdf/H3_AP201907101338389191_1.pdf	31.9397	119.595	Approximate
CNC050	Urea	740	https://www.oilchem.net/	41.2667	123.706	Exact
CNC051	Urea	300	http://pdf.dfcfw.com/pdf/H3_AP201907101338389191_1.pdf	31.9651	120.503	Exact
CNC052	Urea	300	http://pdf.dfcfw.com/pdf/H3_AP201907101338389191_1.pdf	33.7716	119.764	Exact
CNC053	Urea	1600	http://pdf.dfcfw.com/pdf/H3_AP201907101338389191_1.pdf	31.4244	119.855	Exact
CNC054	Urea	800	http://pdf.dfcfw.com/pdf/H3_AP201907101338389191_1.pdf	38.3635	117.644	Exact
CNC055	Urea	1260	http://pdf.dfcfw.com/pdf/H3_AP201907101338389191_1.pdf	37.8705	116.571	Exact
CNC056	Urea	400	http://pdf.dfcfw.com/pdf/H3_AP201907101338389191_1.pdf	36.0931	114.122	Exact
CNC057	Urea	200	http://pdf.dfcfw.com/pdf/H3_AP201907101338389191_1.pdf	35.147	114.185	Exact
CNC058	Urea	2100	http://pdf.dfcfw.com/pdf/H3_AP201907101338389191_1.pdf	35.1797	113.795	Approximate
CNC059	Urea	1600	http://pdf.dfcfw.com/pdf/H3_AP201907101338389191_1.pdf	34.7626	114.487	Exact
CNC060	Urea	120	http://pdf.dfcfw.com/pdf/H3_AP201907101338389191_1.pdf	35.1228	113.394	Exact
CNC061	Urea	520	http://pdf.dfcfw.com/pdf/H3_AP201907101338389191_1.pdf	35.1819	112.805	Exact
CNC062	Urea	1100	http://pdf.dfcfw.com/pdf/H3_AP201907101338389191_1.pdf	34.5051	112.206	Exact
CNC063	Urea	1320	http://pdf.dfcfw.com/pdf/H3_AP201907101338389191_1.pdf	19.572	109.86	Exact
CNC064	Urea	1400	https://www.oilchem.net/	30.3939	111.653	Exact
CNC065	Urea	1000	http://kjt.hubei.gov.cn/kjdt/sxkj/yc/202006/t20200608_2384514.shtml	30.9623	112.195	Exact
CNC066	Urea	600	https://www.oilchem.net/	30.4914	112.883	Exact
CNC067	Urea	300	http://pdf.dfcfw.com/pdf/H3_AP201907101338389191_1.pdf	36.8141	111.647	Exact
CNC068	Urea	700	http://gxt.gansu.gov.cn/gxt/c107573/202009/823072.shtml	35.9747	103.281	Exact
CNC069	Urea	520	https://www.oilchem.net/	28.6012	105.734	Exact
CNC070	Urea	500	https://www.oilchem.net/	41.1936	122	Exact
CNC071	Urea	1040	http://pdf.dfcfw.com/pdf/H3_AP201907101338389191_1.pdf	39.359	106.979	Exact
CNC072	Urea	1320	http://pdf.dfcfw.com/pdf/H3_AP201907101338389191_1.pdf	29.5374	107.495	Exact
CNC073	Urea	300	http://pdf.dfcfw.com/pdf/H3_AP201907101338389191_1.pdf	37.2694	113.656	Exact
CNC074	Urea	800	https://www.oilchem.net/	37.184	116.452	Exact
CNC075	Urea	520	http://www.xjmic.com/org_jbxx/10072.do	41.7193	83.0521	Exact
CNC076	Urea	1040	https://www.oilchem.net/	34.5211	109.695	Exact
CNC077	Urea	520	http://gaoxinqu.weinan.gov.cn/show/index/cid/319/id/6823.html	34.6561	109.484	Approximate
CNC078	Urea	500	https://www.oilchem.net/	47.179	130.285	Exact
CNC079	Urea	780	https://www.oilchem.net/	46.4527	125.21	Exact
CNC080	Urea	480	https://pdf.dfcfw.com/pdf/H3_AP202009091409892705_1.pdf?1601215122000.pdf	35.5941	110.563	Exact
CNC081	Methanol	400	https://baijiahao.baidu.com/s?id=1688827873171454684&wfr=spider&for=pc	29.9819	121.678	Exact
CNC082	Methanol	1700	https://www.sohu.com/a/329052653_796799	32.7004	116.874	Exact
CNC083	Methanol	920	https://www.oilchem.net/	34.977	117.261	Exact
CNC084	Methanol	1800	ICIS capacity reports	37.6489	108.91	Exact
CNC085	Methanol	1200	https://baijiahao.baidu.com/s?id=1688827873171454684&wfr=spider&for=pc	37.6595	108.911	Exact
CNC086	Methanol	670	https://baijiahao.baidu.com/s?id=1688827873171454684&wfr=spider&for=pc	37.6831	121.064	Exact
CNC087	Methanol	1670	https://wenku.baidu.com/view/6a6e54991b37f111f18583d049649b6648d70973.html?fixfr=nBj7gSuklOtSihYFLvCecg%253D%253D&fr=income6-search	38.1739	106.611	Exact
CNC088	Methanol	1800	https://baijiahao.baidu.com/s?id=1688827873171454684&wfr=spider&for=pc	38.6386	109.992	Exact
CNC089	Methanol	500	https://www.oilchem.net/	38.9227	117.728	Exact
CNC090	Methanol	1800	https://www.sohu.com/a/329052653_796799	39.0666	106.737	Exact
CNC091	Methanol	2200	https://wenku.baidu.com/view/e3243c1e5bcfa1c7aa00b52acfc789eb172d9e9d.html?fixfr=YVkhT7fEtqTl9Gp2dnvJ2A%253D%253D&fr=income2-wk_go_search-search	39.0666	106.737	Exact
CNC092	Methanol	1800	https://wenku.baidu.com/view/e3243c1e5bcfa1c7aa00b52acfc789eb172d9e9d.html?fixfr=YVkhT7fEtqTl9Gp2dnvJ2A%253D%253D&fr=income2-wk_go_search-search	39.0743	109.477	Exact
CNC093	Methanol	600	https://wenku.baidu.com/view/6a6e54991b37f111f18583d049649b6648d70973.html?fixfr=nBj7gSuklOtSihYFLvCecg%253D%253D&fr=income6-search	39.2351	108.976	Exact
CNC094	Methanol	1000	https://wenku.baidu.com/view/17ad12234b73f242336c5fde.html?fixfr=%252FK2tonutinP79hkWv3Tsog%253D%253D&fr=income6-wk_go_search-search	40.0772	111.268	Exact
CNC095	Methanol	1800	https://wenku.baidu.com/view/17ad12234b73f242336c5fde.html?fixfr=%252FK2tonutinP79hkWv3Tsog%253D%253D&fr=income6-wk_go_search-search	40.5815	109.884	Exact
CNC096	Methanol	1600	https://wenku.baidu.com/view/6a6e54991b37f111f18583d049649b6648d70973.html?fixfr=nBj7gSuklOtSihYFLvCecg%253D%253D&fr=income6-search	42.2106	116.579	Exact
CNC097	Methanol	1800	ICIS capacity reports	43.8632	87.6502	Approximate
CNC098	Methanol	600	https://www.oilchem.net/	45.7979	131.223	Exact
CNC099	Methanol	300	https://www.oilchem.net/	28.6012	105.734	Exact
CNC100	Methanol	700	https://www.oilchem.net/	45.8179	130.893	Exact
CNC101	Methanol	100	https://www.oilchem.net/	45.8278	130.884	Exact
CNC102	Methanol	600	http://www.tetegu.com/hudong/600623/174177.html	31.0707	121.462	Exact
CNC103	Methanol	1400	https://www.oilchem.net/	19.0919	108.671	Approximate
CNC104	Methanol	600	https://www.oilchem.net/	38.174	106.609	Exact
CNC105	Methanol	150	https://www.oilchem.net/	34.8407	118.223	Exact
CNC106	Methanol	200	https://wenku.baidu.com/view/e3243c1e5bcfa1c7aa00b52acfc789eb172d9e9d.html?fixfr=YVkhT7fEtqTl9Gp2dnvJ2A%253D%253D&fr=income2-wk_go_search-search	33.6371	116.647	Approximate
CNC107	Methanol	400	https://www.oilchem.net/	28.7748	105.38	Approximate
CNC108	Methanol	400	https://www.oilchem.net/	25.7511	103.913	Exact
CNC109	Methanol	100	https://www.oilchem.net/	24.9032	102.495	Approximate
CNC110	Methanol	100	https://www.oilchem.net/	24.6367	103.898	Exact
CNC111	Methanol	200	https://www.oilchem.net/	23.7285	103.242	Approximate
CNC112	Methanol	500	https://wenku.baidu.com/view/6a6e54991b37f111f18583d049649b6648d70973.html?fixfr=nBj7gSuklOtSihYFLvCecg%253D%253D&fr=income6-search	35.4507	116.941	Exact
CNC113	Methanol	250	https://www.oilchem.net/	35.501	116.745	Exact
CNC114	Methanol	300	https://www.oilchem.net/	44.115	87.7657	Approximate
CNC115	Methanol	600	https://www.sohu.com/a/329052653_796799	38.5629	109.902	Approximate
CNC116	Methanol	800	https://baijiahao.baidu.com/s?id=1688827873171454684&wfr=spider&for=pc	38.5629	109.902	Approximate
CNC117	Methanol	150	https://www.sohu.com/a/329052653_796799	41.7531	83.0182	Exact
CNC118	Methanol	300	https://www.oilchem.net/	36.3487	114.229	Approximate
CNC119	Methanol	200	https://wenku.baidu.com/view/17ad12234b73f242336c5fde.html?fixfr=%252FK2tonutinP79hkWv3Tsog%253D%253D&fr=income6-wk_go_search-search	40.0491	111.255	Exact
CNC120	Methanol	300	https://wenku.baidu.com/view/17ad12234b73f242336c5fde.html?fixfr=%252FK2tonutinP79hkWv3Tsog%253D%253D&fr=income6-wk_go_search-search	38.529	109.409	Approximate
CNC121	Methanol	600	https://www.oilchem.net/	39.7787	110.375	Approximate
CNC122	Methanol	100	https://www.oilchem.net/	39.8968	111.339	Approximate
CNC123	Methanol	100	https://baijiahao.baidu.com/s?id=1688827873171454684&wfr=spider&for=pc	40.7119	110.275	Approximate
CNC124	Methanol	400	https://www.oilchem.net/	40.4869	108.786	Approximate
CNC125	Methanol	300	https://wenku.baidu.com/view/e3243c1e5bcfa1c7aa00b52acfc789eb172d9e9d.html?fixfr=YVkhT7fEtqTl9Gp2dnvJ2A%253D%253D&fr=income2-wk_go_search-search	39.4593	106.68	Exact
CNC126	Methanol	600	https://wenku.baidu.com/view/17ad12234b73f242336c5fde.html?fixfr=%252FK2tonutinP79hkWv3Tsog%253D%253D&fr=income6-wk_go_search-search	40.2862	110.045	Exact
CNC127	Methanol	150	https://baijiahao.baidu.com/s?id=1688827873171454684&wfr=spider&for=pc	40.7831	113.257	Exact
CNC128	Methanol	300	https://www.oilchem.net/	40.0691	111.2	Approximate
CNC129	Methanol	900	https://www.oilchem.net/	40.2861	110.047	Exact
CNC130	Methanol	600	https://wenku.baidu.com/view/17ad12234b73f242336c5fde.html?fixfr=%252FK2tonutinP79hkWv3Tsog%253D%253D&fr=income6-wk_go_search-search	40.0483	111.28	Exact
CNC131	Methanol	150	https://wenku.baidu.com/view/e3243c1e5bcfa1c7aa00b52acfc789eb172d9e9d.html?fixfr=YVkhT7fEtqTl9Gp2dnvJ2A%253D%253D&fr=income2-wk_go_search-search	39.2558	108.964	Exact
CNC132	Methanol	1000	https://wenku.baidu.com/view/17ad12234b73f242336c5fde.html?fixfr=%252FK2tonutinP79hkWv3Tsog%253D%253D&fr=income6-wk_go_search-search	39.2518	108.971	Exact
CNC133	Methanol	300	https://www.oilchem.net/	39.0876	109.476	Exact
CNC134	Methanol	200	https://www.oilchem.net/	40.6433	109.217	Approximate
CNC135	Methanol	250	https://www.oilchem.net/	30.9623	112.195	Exact
CNC136	Methanol	120	https://wenku.baidu.com/view/e3243c1e5bcfa1c7aa00b52acfc789eb172d9e9d.html?fixfr=YVkhT7fEtqTl9Gp2dnvJ2A%253D%253D&fr=income2-wk_go_search-search	41.7869	125.821	Exact
CNC137	Methanol	600	https://www.oilchem.net/	34.3744	108.766	Approximate
CNC138	Methanol	100	https://www.oilchem.net/	34.3661	108.776	Exact
CNC139	Methanol	100	https://www.oilchem.net/	39.4672	118.135	Exact
CNC140	Methanol	100	https://www.oilchem.net/	39.8707	117.639	Exact
CNC141	Methanol	150	https://www.oilchem.net/	31.8081	104.8	Exact
CNC142	Methanol	70	https://www.oilchem.net/	29.5049	104.659	Approximate
CNC143	Methanol	100	https://www.oilchem.net/	46.5677	124.822	Exact
CNC144	Methanol	300	https://www.oilchem.net/	37.0681	111.848	Exact
CNC145	Methanol	600	https://www.oilchem.net/	29.9537	116.611	Approximate
CNC146	Methanol	300	https://www.oilchem.net/	38.4445	106.114	Exact
CNC147	Methanol	200	https://www.oilchem.net/	37.4398	106.582	Approximate
CNC148	Methanol	200	https://www.oilchem.net/	30.5098	117.081	Approximate
CNC149	Methanol	400	https://www.oilchem.net/	32.9272	115.864	Approximate
CNC150	Methanol	300	https://www.sohu.com/a/329052653_796799	33.0621	115.282	Exact
CNC151	Methanol	150	https://www.oilchem.net/	32.5479	117.244	Approximate
CNC152	Methanol	390	https://www.oilchem.net/	38.5525	114.918	Approximate
CNC153	Methanol	1000	https://wenku.baidu.com/view/e3243c1e5bcfa1c7aa00b52acfc789eb172d9e9d.html?fixfr=YVkhT7fEtqTl9Gp2dnvJ2A%253D%253D&fr=income2-wk_go_search-search	37.4648	116.262	Approximate
CNC154	Methanol	250	https://www.sohu.com/a/329052653_796799	35.9136	117.726	Exact
CNC155	Methanol	250	https://www.oilchem.net/	34.9859	117.033	Exact
CNC156	Methanol	750	https://www.oilchem.net/	36.8634	118.731	Approximate
CNC157	Methanol	250	https://www.oilchem.net/	35.3404	116.806	Approximate
CNC158	Methanol	200	https://baijiahao.baidu.com/s?id=1688827873171454684&wfr=spider&for=pc	35.6857	111.232	Approximate
CNC159	Methanol	100	https://www.oilchem.net/	37.1897	111.672	Exact
CNC160	Methanol	150	https://www.oilchem.net/	35.9098	111.405	Exact
CNC161	Methanol	300	https://www.oilchem.net/	35.6367	112.879	Exact
CNC162	Methanol	600	https://wenku.baidu.com/view/6a6e54991b37f111f18583d049649b6648d70973.html?fixfr=nBj7gSuklOtSihYFLvCecg%253D%253D&fr=income6-search	40.046	113.165	Exact
CNC163	Methanol	200	https://www.oilchem.net/	39.1839	110.852	Approximate
CNC164	Methanol	200	https://www.oilchem.net/	38.9417	117.686	Exact
CNC165	Methanol	420	https://www.oilchem.net/	35.6541	112.888	Exact
CNC166	Methanol	100	https://www.oilchem.net/	35.7583	112.896	Exact
CNC167	Methanol	200	https://www.oilchem.net/	35.9327	111.493	Exact
CNC168	Methanol	50	https://www.oilchem.net/	35.3749	111.246	Exact
CNC169	Methanol	300	https://www.sohu.com/a/329052653_796799	35.4683	112.605	Exact
CNC170	Methanol	300	https://www.oilchem.net/	35.6208	112.901	Exact
CNC171	Methanol	200	https://www.oilchem.net/	36.3861	112.188	Exact
CNC172	Methanol	400	https://www.oilchem.net/	36.4491	113.112	Exact
CNC173	Methanol	400	https://www.oilchem.net/	36.3048	111.784	Exact
CNC174	Methanol	400	https://www.oilchem.net/	35.1398	110.76	Approximate
CNC175	Methanol	870	https://www.oilchem.net/	29.7948	107.02	Approximate
CNC176	Methanol	1800	https://www.oilchem.net/	21.7007	108.614	Exact
CNC177	Methanol	200	https://www.oilchem.net/	41.7829	81.8875	Approximate
CNC178	Methanol	220	https://www.oilchem.net/	44.3009	86.1104	Approximate
CNC179	Methanol	300	https://wenku.baidu.com/view/e3243c1e5bcfa1c7aa00b52acfc789eb172d9e9d.html?fixfr=YVkhT7fEtqTl9Gp2dnvJ2A%253D%253D&fr=income2-wk_go_search-search	44.3032	86.1096	Approximate
CNC180	Methanol	1200	https://guba.eastmoney.com/news,600256,113397549.html	43.7066	94.9783	Exact
CNC181	Methanol	500	https://www.oilchem.net/	44.3508	87.6822	Exact
CNC182	Methanol	150	https://www.oilchem.net/	40.9518	113.11	Approximate
CNC183	Methanol	70	https://www.oilchem.net/	32.2128	106.23	Approximate
CNC184	Methanol	600	https://wenku.baidu.com/view/e3243c1e5bcfa1c7aa00b52acfc789eb172d9e9d.html?fixfr=YVkhT7fEtqTl9Gp2dnvJ2A%253D%253D&fr=income2-wk_go_search-search	35.7524	116.795	Approximate
CNC185	Methanol	700	https://www.oilchem.net/	37.9879	109.29	Approximate
CNC186	Methanol	430	https://wenku.baidu.com/view/17ad12234b73f242336c5fde.html?fixfr=%252FK2tonutinP79hkWv3Tsog%253D%253D&fr=income6-wk_go_search-search	38.2289	109.781	Approximate
CNC187	Methanol	250	https://www.oilchem.net/	31.9397	119.595	Approximate
CNC188	Methanol	300	https://www.oilchem.net/	34.3962	117.942	Exact
CNC189	Methanol	200	https://www.oilchem.net/	38.287	117.815	Exact
CNC190	Methanol	200	https://www.oilchem.net/	39.248	119.029	Exact
CNC191	Methanol	150	https://www.oilchem.net/	36.5753	114.105	Approximate
CNC192	Methanol	100	https://www.oilchem.net/	39.871	117.638	Approximate
CNC193	Methanol	300	https://www.oilchem.net/	38.3635	117.644	Exact
CNC194	Methanol	300	https://www.oilchem.net/	38.0712	114.538	Approximate
CNC195	Methanol	500	https://wenku.baidu.com/view/6a6e54991b37f111f18583d049649b6648d70973.html?fixfr=nBj7gSuklOtSihYFLvCecg%253D%253D&fr=income6-search	35.7643	114.999	Approximate
CNC196	Methanol	300	https://wenku.baidu.com/view/e3243c1e5bcfa1c7aa00b52acfc789eb172d9e9d.html?fixfr=YVkhT7fEtqTl9Gp2dnvJ2A%253D%253D&fr=income2-wk_go_search-search	35.1797	113.795	Approximate
CNC197	Methanol	500	https://wenku.baidu.com/view/6a6e54991b37f111f18583d049649b6648d70973.html?fixfr=nBj7gSuklOtSihYFLvCecg%253D%253D&fr=income6-search	33.8903	116.411	Exact
CNC198	Methanol	350	https://www.oilchem.net/	30.3939	111.653	Exact
CNC199	Methanol	500	https://www.oilchem.net/	30.8352	104.15	Approximate
CNC200	Methanol	600	https://wenku.baidu.com/view/6a6e54991b37f111f18583d049649b6648d70973.html?fixfr=nBj7gSuklOtSihYFLvCecg%253D%253D&fr=income6-search	35.2551	106.811	Exact
CNC201	Methanol	100	https://www.oilchem.net/	41.0778	107.034	Approximate
CNC202	Methanol	100	https://www.oilchem.net/	39.8369	106.785	Approximate
CNC203	Methanol	300	https://www.oilchem.net/	39.3853	106.898	Exact
CNC204	Methanol	600	https://www.sohu.com/a/329052653_796799	31.0159	112.267	Exact
CNC205	Methanol	400	https://baijiahao.baidu.com/s?id=1710418784571374125&wfr=spider&for=pc	30.1957	120.594	Exact
CNC206	Methanol	300	https://www.oilchem.net/	40.0487	111.286	Exact
CNC207	Methanol	450	https://www.oilchem.net/	35.4299	114.056	Exact
CNC208	Methanol	200	http://nyj.guizhou.gov.cn/nyxgc/201704/t20170427_27677706.html	26.6858	107.523	Approximate
CNC209	Methanol	500	https://www.oilchem.net/	31.1897	107.453	Approximate
CNC210	Methanol	120	https://www.sohu.com/a/329052653_796799	39.3584	107.008	Exact
CNC211	Methanol	110	https://www.oilchem.net/	30.1815	105.846	Approximate
CNC212	Methanol	300	https://www.oilchem.net/	28.9622	106.926	Approximate
CNC213	Methanol	850	https://www.oilchem.net/	29.8198	107.044	Approximate
CNC214	Methanol	200	https://www.oilchem.net/	37.1077	114.567	Approximate
CNC215	Methanol	150	https://www.oilchem.net/	35.3481	115.991	Approximate
CNC216	Methanol	300	https://www.oilchem.net/	34.2792	108.51	Approximate
CNC217	Methanol	600	https://www.oilchem.net/	34.6561	109.484	Approximate
CNC218	Methanol	200	https://www.oilchem.net/	34.8656	108.996	Approximate
CNC219	Methanol	600	https://www.oilchem.net/	35.2115	107.764	Approximate
CNC220	Methanol	600	https://wenku.baidu.com/view/17ad12234b73f242336c5fde.html?fixfr=%252FK2tonutinP79hkWv3Tsog%253D%253D&fr=income6-wk_go_search-search	38.7461	110.177	Exact
CNC221	Methanol	260	https://baijiahao.baidu.com/s?id=1688827873171454684&wfr=spider&for=pc	38.2449	109.74	Approximate
CNC222	Methanol	600	https://www.oilchem.net/	34.4868	107.236	Approximate
CNC223	Methanol	300	https://www.oilchem.net/	35.6423	109.087	Approximate
CNC224	Methanol	120	https://www.oilchem.net/	35.5564	110.481	Approximate
CNC225	Methanol	600	https://www.oilchem.net/	36.3715	94.9536	Exact
CNC226	Methanol	800	https://www.oilchem.net/	36.5461	101.491	Exact
CNC227	Methanol	600	https://wenku.baidu.com/view/6a6e54991b37f111f18583d049649b6648d70973.html?fixfr=nBj7gSuklOtSihYFLvCecg%253D%253D&fr=income6-search	35.8996	114.185	Approximate
CNC228	Methanol	100	https://www.oilchem.net/	45.7659	130.568	Approximate
CNC229	BTX	100	https://www.oilchem.net/	37.6831	121.064	Exact
CNC230	BTX	1720	https://www.oilchem.net/	30.7002	121.284	Exact
CNC231	BTX	375	https://wenku.baidu.com/view/7666d62fcfc789eb172dc869.html https://www.docin.com/p-593137469.html	30.7813	121.431	Exact
CNC232	BTX	50	https://www.oilchem.net/	35.3008	115.123	Exact
CNC233	BTX	280	https://www.oilchem.net/	35.3045	115.123	Exact
CNC234	BTX	30	http://free.chinabaogao.com/huagong/202012/1211524pr020.html	38.097	118.885	Exact
CNC235	BTX	750	https://www.oilchem.net/	25.0512	118.894	Exact
CNC236	BTX	200	http://free.chinabaogao.com/huagong/202012/1211524pr020.html	25.0587	118.898	Exact
CNC237	BTX	400	https://wenku.baidu.com/view/fe59c5186c175f0e7cd137d8.html	38.8289	117.412	Exact
CNC238	BTX	440	http://free.chinabaogao.com/huagong/202012/1211524pr020.html	22.7468	114.609	Exact
CNC239	BTX	490	https://www.oilchem.net/	32.3013	119.848	Exact
CNC240	BTX	310	https://www.oilchem.net/	29.5131	113.366	Approximate
CNC241	BTX	310	http://free.chinabaogao.com/huagong/202012/1211524pr020.html https://baijiahao.baidu.com/s?id=1666358036078106712&wfr=spider&for=pc	21.0495	110.462	Exact
CNC242	BTX	146	https://www.oilchem.net/	30.6304	114.51	Exact
CNC243	BTX	1680	https://www.oilchem.net/	43.9673	87.7124	Exact
CNC244	BTX	212	https://www.oilchem.net/	29.7366	116.061	Exact
CNC245	BTX	130	https://www.sohu.com/a/166732775_778794	24.9257	102.486	Approximate
CNC246	BTX	575	https://www.oilchem.net/	37.1545	118.132	Exact
CNC247	BTX	400	https://www.oilchem.net/	38.7399	116.131	Exact
CNC248	BTX	455	https://www.oilchem.net/	36.1062	103.644	Exact
CNC249	BTX	280	https://www.oilchem.net/	37.522	118.238	Exact
CNC250	BTX	580	https://www.oilchem.net/	38.7396	116.139	Approximate
CNC251	BTX	440	https://www.oilchem.net/	41.2012	122.002	Exact
CNC252	BTX	730	https://www.oilchem.net/	43.9395	126.526	Exact
CNC253	BTX	570	http://free.chinabaogao.com/huagong/202012/1211524pr020.html	39.2376	118.38	Approximate
CNC254	BTX	370	http://free.chinabaogao.com/huagong/202012/1211524pr020.html	31.0265	103.93	Approximate
CNC255	BTX	75	https://www.oilchem.net/	41.7229	82.9595	Approximate
CNC256	BTX	820	https://www.oilchem.net/	46.5255	125.09	Exact
CNC257	BTX	500	https://www.oilchem.net/	46.5311	125.102	Exact
CNC258	BTX	734.9	https://www.oilchem.net/	29.9224	121.993	Exact
CNC259	BTX	900	https://wenku.baidu.com/view/7666d62fcfc789eb172dc869.html https://www.docin.com/p-593137469.html	38.9768	121.658	Exact
CNC260	BTX	1470	https://www.oilchem.net/	38.9558	121.858	Exact
CNC261	BTX	800	https://www.oilchem.net/	38.988	121.855	Exact
CNC262	BTX	1597	https://www.oilchem.net/	38.8227	117.414	Exact
CNC263	BTX	300	https://www.oilchem.net/	37.8908	118.468	Approximate
CNC264	BTX	444	https://www.oilchem.net/	36.9744	118.544	Exact
CNC265	BTX	70	https://www.oilchem.net/	37.5754	118.526	Approximate
CNC266	BTX	180	https://www.oilchem.net/	34.7947	117.249	Exact
CNC267	BTX	100	https://www.oilchem.net/	37.2608	118.863	Approximate
CNC268	BTX	466	https://www.oilchem.net/	23.11	113.47	Approximate
CNC269	BTX	50	https://www.oilchem.net/	37.0913	118.418	Exact
CNC270	BTX	980	https://www.sohu.com/a/166732775_778794	37.04	119.117	Exact
CNC271	BTX	5108	https://www.oilchem.net/	39.5746	121.254	Exact
CNC272	BTX	320	https://www.sohu.com/a/166732775_778794 https://www.docin.com/p-593137469.html	22.7461	114.605	Exact
CNC273	BTX	1140	https://www.oilchem.net/	22.7662	114.618	Approximate
CNC274	BTX	250	https://wenku.baidu.com/view/7666d62fcfc789eb172dc869.html https://www.docin.com/p-593137469.html	32.2458	118.802	Exact
CNC275	BTX	1150	https://www.oilchem.net/	32.2347	118.775	Exact
CNC276	BTX	406	https://www.oilchem.net/	41.8259	124.041	Exact
CNC277	BTX	150	https://www.oilchem.net/	36.8454	119.359	Approximate
CNC278	BTX	138	https://www.oilchem.net/	30.653	114.441	Exact
CNC279	BTX	348	https://www.oilchem.net/	35.0966	119.251	Approximate
CNC280	BTX	75	https://www.oilchem.net/	41.7878	123.26	Exact
CNC281	BTX	450	https://www.oilchem.net/	34.8607	112.562	Approximate
CNC282	BTX	541	https://www.oilchem.net/	34.9106	112.6	Exact
CNC283	BTX	4960	https://www.oilchem.net/	29.9749	121.668	Exact
CNC284	BTX	257.7	https://www.oilchem.net/	29.9806	121.661	Exact
CNC285	BTX	4730	https://www.oilchem.net/	29.9835	121.674	Exact
CNC286	BTX	1295	https://www.oilchem.net/	19.7621	109.176	Exact
CNC287	BTX	400	https://www.oilchem.net/	46.0373	124.813	Approximate
CNC288	BTX	205	https://www.oilchem.net/	21.1702	110.392	Exact
CNC289	BTX	756	https://www.oilchem.net/	39.7296	115.963	Exact
CNC290	BTX	853	https://www.oilchem.net/	44.3591	84.8684	Exact
CNC291	BTX	170	https://wenku.baidu.com/view/fe59c5186c175f0e7cd137d8.html	41.3416	122.165	Exact
CNC292	BTX	1670	https://www.oilchem.net/	34.6325	119.499	Approximate
CNC293	BTX	980	http://free.chinabaogao.com/huagong/202012/1211524pr020.html	34.6399	119.486	Approximate
CNC294	BTX	377	https://www.oilchem.net/	37.972	114.677	Exact
CNC295	BTX	200	https://www.oilchem.net/	37.9735	114.68	Exact
CNC296	BTX	169	https://www.oilchem.net/	25.9194	119.237	Approximate
CNC297	BTX	1390	https://www.oilchem.net/	25.1777	118.937	Exact
CNC298	BTX	1540	https://www.oilchem.net/	23.9544	117.639	Approximate
CNC299	BTX	361.3	https://www.oilchem.net/	30.1535	122.085	Exact
CNC300	BTX	362	https://www.oilchem.net/	21.5771	110.965	Exact
CNC301	BTX	1728	https://www.oilchem.net/	30.0313	121.641	Exact
CNC302	BTX	890	https://wenku.baidu.com/view/7666d62fcfc789eb172dc869.html	41.2192	123.211	Approximate
CNC303	BTX	30	https://www.oilchem.net/	37.0402	117.916	Approximate
CNC304	BTX	480	http://free.chinabaogao.com/huagong/202012/1211524pr020.html	32.1436	118.922	Approximate
CNC305	BTX	990	http://mt.sohu.com/20170623/n498297237.shtml	21.7359	108.58	Exact
CNC306	BTX	28	https://www.docin.com/p-593137469.html	41.1415	121.095	Exact
CNC307	BTX	700	https://www.oilchem.net/	41.1363	121.09	Exact
CNC308	BTX	730	https://www.oilchem.net/	41.1435	121.089	Exact
CNC309	BTX	1390	https://www.oilchem.net/	29.9851	121.683	Exact
CNC310	BTX	962	https://www.oilchem.net/	36.0562	120.207	Exact
CNC311	BTX	550	https://www.oilchem.net/	36.0556	120.183	Exact
CNC312	BTX	30	https://www.oilchem.net/	36.2138	120.366	Exact
CNC313	BTX	494	https://www.oilchem.net/	31.3077	121.568	Exact
CNC314	BTX	500	https://www.oilchem.net/	37.1995	118.845	Exact
CNC315	BTX	250	https://www.oilchem.net/	37.2061	118.857	Exact
CNC316	BTX	390	https://www.oilchem.net/	37.1199	118.441	Exact
CNC317	BTX	730	https://www.oilchem.net/	36.7776	118.174	Exact
CNC318	Ethylene	1000	https://www.sohu.com/a/468339605_121123882	21.0211	110.389	Approximate
CNC319	Ethylene	1000	https://www.sohu.com/a/468339605_121123882	21.0211	110.389	Approximate
CNC320	Ethylene	1200	https://www.sohu.com/a/468339605_121123882	22.7462	114.575	Approximate
CNC321	Ethylene	1200	https://www.sohu.com/a/468339605_121123882	22.7462	114.575	Approximate
CNC322	Ethylene	1000	https://www.sohu.com/a/468339605_121123882	37.6831	121.064	Exact
CNC323	Ethylene	700	https://www.sohu.com/a/455284764_120116438	30.7023	121.326	Exact
CNC324	Ethylene	1140	https://www.sohu.com/a/455284764_120116438	30.7813	121.431	Exact
CNC325	Ethylene	400	https://www.sohu.com/a/468339605_121123882	35.3008	115.123	Exact
CNC326	Ethylene	1000	https://www.sohu.com/a/468339605_121123882	25.0512	118.894	Exact
CNC327	Ethylene	180	https://www.sohu.com/a/455284764_120116438, https://baijiahao.baidu.com/s?id=1662137280638162710&wfr=spider&for=pc	35.765	114.973	Exact
CNC328	Ethylene	600	http://www.shzywchina.com/index.php?s=/Jysh38shzyw/news/info/id/2226.html	39.0743	109.477	Exact
CNC329	Ethylene	600	http://www.shzywchina.com/index.php?s=/Jysh38shzyw/news/info/id/2226.html	39.078	109.479	Exact
CNC330	Ethylene	400	http://futures.hexun.com/2020-09-25/202133633.html	32.7004	116.874	Exact
CNC331	Ethylene	1300	https://www.sohu.com/a/455284764_120116438, https://www.sohu.com/a/468339605_121123882	38.8289	117.412	Exact
CNC332	Ethylene	1500	https://www.sohu.com/a/468339605_121123882	23.8218	117.609	Exact
CNC333	Ethylene	1200	https://www.sohu.com/a/290474931_237486	22.7468	114.609	Exact
CNC334	Ethylene	300	https://baijiahao.baidu.com/s?id=1662137280638162710&wfr=spider&for=pc	37.6489	108.91	Exact
CNC335	Ethylene	300	https://www.sohu.com/a/468339605_121123882	37.6595	108.911	Exact
CNC336	Ethylene	300	https://baijiahao.baidu.com/s?id=1662137280638162710&wfr=spider&for=pc	39.2351	108.976	Exact
CNC337	Ethylene	800	https://www.sohu.com/a/468339605_121123882	21.0514	110.455	Exact
CNC338	Ethylene	1200	https://www.sohu.com/a/468339605_121123882	21.0434	110.464	Exact
CNC339	Ethylene	1100	https://www.sohu.com/a/455284764_120116438, https://www.sohu.com/a/468339605_121123883	30.6304	114.51	Exact
CNC340	Ethylene	300	http://futures.hexun.com/2020-09-25/202133633.html	40.0772	111.268	Approximate
CNC341	Ethylene	700	https://www.sohu.com/a/455285607_120116442	36.1062	103.644	Exact
CNC342	Ethylene	200	https://baijiahao.baidu.com/s?id=1662137280638162710&wfr=spider&for=pc	35.1963	106.578	Approximate
CNC343	Ethylene	600	https://www.sohu.com/a/468339605_121123888	29.9303	121.953	Exact
CNC344	Ethylene	460	http://www.360doc.com/content/15/0414/13/21889302_463123036.shtml	41.2012	122.002	Exact
CNC345	Ethylene	1500	https://www.sohu.com/a/468339605_121123882	40.7208	122.17	Approximate
CNC346	Ethylene	600	https://www.chyxx.com/industry/202005/861617.html	32.2706	118.818	Exact
CNC347	Ethylene	1200	https://www.sohu.com/a/468339605_121123882	38.7313	117.543	Exact
CNC348	Ethylene	1250	https://www.sohu.com/a/468339605_121123883	30.7343	120.89	Exact
CNC349	Ethylene	300	https://baijiahao.baidu.com/s?id=1662137280638162710&wfr=spider&for=pc	43.9776	126.477	Exact
CNC350	Ethylene	850	https://www.sohu.com/a/455285607_120116439	43.9395	126.526	Exact
CNC351	Ethylene	300	https://www.sohu.com/a/468339605_121123882	40.3058	113.682	Approximate
CNC352	Ethylene	800	https://www.sohu.com/a/455285607_120116444	31.0265	103.93	Approximate
CNC353	Ethylene	600	https://www.sohu.com/a/468339605_121123887	41.8249	85.9804	Approximate
CNC354	Ethylene	1200	https://www.sohu.com/a/455285607_120116438	46.5255	125.09	Exact
CNC355	Ethylene	300	https://www.sohu.com/a/468339605_121123882	38.9227	117.728	Exact
CNC356	Ethylene	200	https://www.sohu.com/a/455284764_120116438	38.8227	117.414	Exact
CNC357	Ethylene	300	https://baijiahao.baidu.com/s?id=1662137280638162710&wfr=spider&for=pc	39.0666	106.737	Exact
CNC358	Ethylene	300	https://baijiahao.baidu.com/s?id=1662137280638162710&wfr=spider&for=pc	30.037	121.638	Exact
CNC359	Ethylene	1000	https://www.sohu.com/a/468339605_121123882	41.9862	122.837	Approximate
CNC360	Ethylene	170	https://baijiahao.baidu.com/s?id=1662137280638162710&wfr=spider&for=pc	34.9851	117.278	Exact
CNC361	Ethylene	140	http://futures.hexun.com/2020-09-25/202133633.html	34.977	117.261	Exact
CNC362	Ethylene	3000	https://www.sohu.com/a/468339605_121123882	37.5849	120.263	Approximate
CNC363	Ethylene	300	https://www.sohu.com/a/468339605_121123882	37.8599	112.447	Approximate
CNC364	Ethylene	160	https://www.sohu.com/a/151417821_237486	31.9466	119.974	Exact
CNC365	Ethylene	1200	https://www.sohu.com/a/468339605_121123882	21.7481	110.634	Approximate
CNC366	Ethylene	210	https://www.sohu.com/a/455284764_120116438	23.11	113.47	Approximate
CNC367	Ethylene	600	https://www.sohu.com/a/468339605_121123882	21.6816	108.659	Exact
CNC368	Ethylene	450	https://www.sohu.com/a/290474931_237486	35.9075	109.357	Exact
CNC369	Ethylene	1500	https://www.chyxx.com/industry/202005/861617.html	39.5746	121.254	Exact
CNC370	Ethylene	1500	https://www.sohu.com/a/468339605_121123882	39.5698	121.252	Exact
CNC371	Ethylene	1500	https://www.sohu.com/a/468339605_121123882	38.2501	109.737	Approximate
CNC372	Ethylene	1000	https://xueshu.baidu.com/usercenter/paper/show?paperid=909a7f5a9b1a62c86e7d8a13f75fc59e&site=xueshu_se	22.7473	114.606	Exact
CNC373	Ethylene	1200	https://www.sohu.com/a/230345104_167168	22.7533	114.58	Exact
CNC374	Ethylene	740	https://www.sohu.com/a/455284764_120116438	32.2458	118.802	Exact
CNC375	Ethylene	800	https://www.sohu.com/a/455284764_120116438	32.2347	118.775	Exact
CNC376	Ethylene	940	https://www.sohu.com/a/455285607_120116440	41.8259	124.041	Exact
CNC377	Ethylene	650	https://www.chyxx.com/industry/202005/861617.html	32.1447	119.971	Approximate
CNC378	Ethylene	300	https://www.sohu.com/a/131593626_697078/	43.8374	87.5074	Approximate
CNC379	Ethylene	1500	https://www.sohu.com/a/468339605_121123882	25.5065	119.181	Approximate
CNC380	Ethylene	265	http://www.360doc.com/content/15/0414/13/21889302_463123036.shtml	41.7878	123.26	Exact
CNC381	Ethylene	1000	https://www.sohu.com/a/468339605_121123882	34.9081	112.601	Exact
CNC382	Ethylene	300	https://baijiahao.baidu.com/s?id=1662137280638162710&wfr=spider&for=pc	30.6108	121.034	Exact
CNC383	Ethylene	1400	https://www.chyxx.com/industry/202005/861617.html	29.9723	121.673	Exact
CNC384	Ethylene	1400	https://www.sohu.com/a/468339605_121123882	29.9806	121.661	Exact
CNC385	Ethylene	1000	https://www.sohu.com/a/468339605_121123882	20.0239	110.263	Approximate
CNC386	Ethylene	400	https://www.sohu.com/a/468339605_121123882	46.0373	124.813	Approximate
CNC387	Ethylene	710	https://www.sohu.com/a/455284764_120116438	39.7296	115.963	Exact
CNC388	Ethylene	1320	https://www.sohu.com/a/455285607_120116443	44.3591	84.8684	Exact
CNC389	Ethylene	370	https://baijiahao.baidu.com/s?id=1662137280638162710&wfr=spider&for=pc	34.6093	119.498	Approximate
CNC390	Ethylene	1100	https://www.sohu.com/a/468339605_121123884	34.6399	119.486	Approximate
CNC391	Ethylene	300	https://baijiahao.baidu.com/s?id=1662137280638162710&wfr=spider&for=pc	40.5815	109.884	Exact
CNC392	Ethylene	370	https://www.sohu.com/a/359002417_100273878	38.1805	106.628	Exact
CNC393	Ethylene	270	https://baijiahao.baidu.com/s?id=1662137280638162710&wfr=spider&for=pc	43.8632	87.6502	Approximate
CNC394	Ethylene	300	https://baijiahao.baidu.com/s?id=1662137280638162710&wfr=spider&for=pc	38.6386	109.992	Approximate
CNC395	Ethylene	800	https://www.sohu.com/a/468339605_121123882	25.9194	119.237	Approximate
CNC396	Ethylene	1100	https://www.sohu.com/a/455284764_120116438	25.1777	118.937	Exact
CNC397	Ethylene	2000	https://www.sohu.com/a/468339605_121123882	41.4022	122.386	Exact
CNC398	Ethylene	1000	https://www.sohu.com/a/455284764_120116438	21.5771	110.965	Exact
CNC399	Ethylene	330	https://baijiahao.baidu.com/s?id=1662137280638162710&wfr=spider&for=pc	34.897	109.698	Approximate
CNC400	Ethylene	450	https://business.sohu.com/20080531/n257234655.shtml	40.8905	122.038	Approximate
CNC401	Ethylene	1000	https://www.sohu.com/a/455285607_120116441，https://www.sohu.com/a/468339605_121123882, https://www.sohu.com/a/351964038_100273878	41.2192	123.211	Approximate
CNC402	Ethylene	1000	https://www.sohu.com/a/468339605_121123882	29.9804	121.676	Exact
CNC403	Ethylene	1200	https://www.sohu.com/a/468339605_121123882	29.9784	121.662	Exact
CNC404	Ethylene	800	https://www.sohu.com/a/468339605_121123886	34.3488	108.753	Approximate
CNC405	Ethylene	130	https://baijiahao.baidu.com/s?id=1662137280638162710&wfr=spider&for=pc	34.6344	118.315	Exact
CNC406	Ethylene	100	https://www.sohu.com/a/468339605_121123882	38.7515	110.17	Exact
CNC407	Ethylene	300	https://www.hzeyun.com/detail/2502973	36.5487	101.524	Exact
CNC408	Ethylene	160	https://baijiahao.baidu.com/s?id=1662137280638162710&wfr=spider&for=pc	36.5584	101.502	Exact
CNC409	Ethylene	300	https://www.sohu.com/a/468339605_121123882	36.3792	94.9477	Exact
CNC410	Ethylene	1000	https://www.sohu.com/a/468339605_121123885	37.2061	118.857	Exact
CNC411	Ethylene	800	https://www.sohu.com/a/455284764_120116438	36.7776	118.174	Exact
CNC412	Propylene	750	https://www.qianinfo.com/wz/dsgl/397.html	37.6831	121.064	Exact
CNC413	Propylene	750	https://www.qianinfo.com/wz/dsgl/397.html	37.6873	121.073	Exact
CNC414	Propylene	170	http://www.sh.chinanews.com.cn/swzx/2021-01-15/84440.shtml	30.7002	121.284	Exact
CNC415	Propylene	250	https://wenku.baidu.com/view/0b87371f260c844769eae009581b6bd97e19bcfe.html	30.7023	121.326	Exact
CNC416	Propylene	600	https://www.qianinfo.com/wz/dsgl/397.html	30.7813	121.431	Exact
CNC417	Propylene	660	https://www.163.com/dy/article/FEU2R48A05509P99.html	29.8832	121.932	Approximate
CNC418	Propylene	600	https://wenku.baidu.com/view/f8f36d0083c758f5f61fb7360b4c2e3f56272541.html	29.881	121.935	Approximate
CNC419	Propylene	660	https://www.docin.com/p-2294431960.html	39.0629	118.437	Approximate
CNC420	Propylene	200	https://wenku.baidu.com/view/0b87371f260c844769eae009581b6bd97e19bcfe.html	19.0609	108.634	Exact
CNC421	Propylene	100	https://wenku.baidu.com/view/0b87371f260c844769eae009581b6bd97e19bcfe.html	35.3045	115.123	Exact
CNC422	Propylene	600	https://www.sohu.com/a/303777381_747560	22.9503	113.557	Exact
CNC423	Propylene	600	https://www.sohu.com/a/391441452_99902541	22.9435	113.562	Exact
CNC424	Propylene	350	https://www.oilchem.net/	38.097	118.885	Exact
CNC425	Propylene	700	https://www.docin.com/p-2294431960.html	25.0512	118.894	Exact
CNC426	Propylene	690	https://www.sohu.com/a/435814807_120478004	34.2936	120.08	Exact
CNC427	Propylene	90	https://wenku.baidu.com/view/0b87371f260c844769eae009581b6bd97e19bcfe.html	35.765	114.973	Exact
CNC428	Propylene	1000	https://www.sohu.com/a/435814807_120478004	38.0893	118.945	Exact
CNC429	Propylene	700	https://www.qianinfo.com/wz/dsgl/397.html	39.0743	109.477	Exact
CNC430	Propylene	700	https://www.qianinfo.com/wz/dsgl/397.html	39.078	109.479	Exact
CNC431	Propylene	300	https://www.docin.com/p-2294431960.html	32.7004	116.874	Exact
CNC432	Propylene	120	https://wenku.baidu.com/view/0b87371f260c844769eae009581b6bd97e19bcfe.html	35.3039	115.127	Exact
CNC433	Propylene	500	https://www.qianinfo.com/wz/dsgl/397.html	38.8289	117.412	Exact
CNC434	Propylene	430	https://wenku.baidu.com/view/0b87371f260c844769eae009581b6bd97e19bcfe.html	22.7468	114.609	Exact
CNC435	Propylene	600	https://www.qianinfo.com/wz/dsgl/397.html	37.6489	108.91	Exact
CNC436	Propylene	300	https://www.sohu.com/a/157326375_237486	37.6595	108.911	Exact
CNC437	Propylene	300	https://www.sohu.com/a/279471718_100199292	39.2351	108.976	Exact
CNC438	Propylene	430	https://www.163.com/dy/article/FEU2R48A05509P99.html	21.0514	110.455	Exact
CNC439	Propylene	320	https://www.163.com/dy/article/FEU2R48A05509P99.html	21.0495	110.462	Exact
CNC440	Propylene	550	https://www.163.com/dy/article/FEU2R48A05509P99.html	30.6304	114.51	Exact
CNC441	Propylene	300	https://xueshu.baidu.com/usercenter/paper/show?paperid=11610j70xf6q0r00dj4r04502w449288	40.0772	111.268	Approximate
CNC442	Propylene	200	https://www.oilchem.net/	38.0858	118.883	Exact
CNC443	Propylene	580	https://wenku.baidu.com/view/0b87371f260c844769eae009581b6bd97e19bcfe.html	37.1545	118.132	Exact
CNC444	Propylene	200	https://www.docin.com/p-2294431960.html	35.1963	106.578	Approximate
CNC445	Propylene	100	https://www.163.com/dy/article/FEU2R48A05509P99.html	38.7396	116.139	Approximate
CNC446	Propylene	600	https://www.sohu.com/a/463742939_808009	29.9278	121.953	Exact
CNC447	Propylene	230	https://wenku.baidu.com/view/4f6912e9376baf1ffd4fad72.html	41.2012	122.002	Exact
CNC448	Propylene	540	https://www.oilchem.net/	32.2706	118.818	Exact
CNC449	Propylene	1500	http://xianjinliu.ainoob.cn/tzlc/tzfx2020/53330.html	34.5619	119.596	Exact
CNC450	Propylene	600	https://www.sohu.com/a/435814807_120478004	29.9069	121.885	Exact
CNC451	Propylene	165	https://www.163.com/dy/article/FEU2R48A05509P99.html	43.9776	126.477	Exact
CNC452	Propylene	600	https://www.qianinfo.com/wz/dsgl/397.html	43.9395	126.526	Exact
CNC453	Propylene	109	https://wenku.baidu.com/view/0b87371f260c844769eae009581b6bd97e19bcfe.html	45.7583	126.738	Exact
CNC454	Propylene	400	https://www.qianinfo.com/wz/dsgl/397.html	31.0265	103.93	Approximate
CNC455	Propylene	460	https://www.docin.com/p-2294431960.html	42.2106	116.579	Exact
CNC456	Propylene	80	https://wenku.baidu.com/view/0b87371f260c844769eae009581b6bd97e19bcfe.html	46.6974	124.803	Exact
CNC457	Propylene	200	https://www.oilchem.net/	46.559	124.829	Exact
CNC458	Propylene	600	https://www.qianinfo.com/wz/dsgl/397.html	46.5255	125.09	Exact
CNC459	Propylene	320	https://wenku.baidu.com/view/0b87371f260c844769eae009581b6bd97e19bcfe.html	38.9768	121.658	Exact
CNC460	Propylene	140	https://wenku.baidu.com/view/0b87371f260c844769eae009581b6bd97e19bcfe.html	38.988	121.855	Exact
CNC461	Propylene	600	https://www.qianinfo.com/wz/dsgl/397.html	38.9227	117.728	Exact
CNC462	Propylene	600	https://www.qianinfo.com/wz/dsgl/397.html	38.931	117.743	Exact
CNC463	Propylene	100	https://wenku.baidu.com/view/0b87371f260c844769eae009581b6bd97e19bcfe.html	38.8227	117.414	Exact
CNC464	Propylene	300	https://www.qianinfo.com/wz/dsgl/397.html	39.0666	106.737	Exact
CNC465	Propylene	300	https://www.163.com/dy/article/FEU2R48A05509P99.html	38.1645	106.586	Approximate
CNC466	Propylene	400	https://www.qianinfo.com/wz/dsgl/397.html	30.037	121.638	Exact
CNC467	Propylene	600	https://www.qianinfo.com/wz/dsgl/397.html	29.9538	121.778	Exact
CNC468	Propylene	120	https://wenku.baidu.com/view/0b87371f260c844769eae009581b6bd97e19bcfe.html	30.5253	117.021	Exact
CNC469	Propylene	690	https://www.163.com/dy/article/FEU2R48A05509P99.html	41.9862	122.837	Approximate
CNC470	Propylene	350	https://wenku.baidu.com/view/0b87371f260c844769eae009581b6bd97e19bcfe.html	36.9744	118.544	Exact
CNC471	Propylene	200	https://www.docin.com/p-2294431960.html	35.2737	115.956	Exact
CNC472	Propylene	100	https://www.docin.com/p-2294431960.html	37.9766	118.468	Exact
CNC473	Propylene	200	https://www.docin.com/p-2294431960.html	34.9851	117.278	Exact
CNC474	Propylene	200	https://www.oilchem.net/	34.977	117.261	Exact
CNC475	Propylene	200	https://www.docin.com/p-2294431960.html	38.07	118.926	Exact
CNC476	Propylene	200	https://www.docin.com/p-2294431960.html	38.0877	118.866	Exact
CNC477	Propylene	200	https://www.docin.com/p-2294431960.html	37.1108	119.037	Approximate
CNC478	Propylene	100	https://wenku.baidu.com/view/0b87371f260c844769eae009581b6bd97e19bcfe.html	29.5129	113.366	Approximate
CNC479	Propylene	160	https://www.sohu.com/a/151417821_237486	31.9466	119.974	Exact
CNC480	Propylene	100	extrapolate from monthly output http://www.sinopecnews.com.cn/b2b/content/2020-07/13/content_1811589.htm	23.11	113.47	Approximate
CNC481	Propylene	100	https://wenku.baidu.com/view/0b87371f260c844769eae009581b6bd97e19bcfe.html	37.6751	118.337	Exact
CNC482	Propylene	230	https://wenku.baidu.com/view/0b87371f260c844769eae009581b6bd97e19bcfe.html	21.7725	108.608	Exact
CNC483	Propylene	100	https://wenku.baidu.com/view/0b87371f260c844769eae009581b6bd97e19bcfe.html	37.0913	118.418	Exact
CNC484	Propylene	450	https://www.qianinfo.com/wz/dsgl/397.html	35.9075	109.357	Exact
CNC485	Propylene	500	https://www.oilchem.net/	37.04	119.117	Exact
CNC486	Propylene	400	https://www.163.com/dy/article/FEU2R48A05509P99.html	39.5746	121.254	Exact
CNC487	Propylene	560	https://www.qianinfo.com/wz/dsgl/397.html	22.7473	114.606	Exact
CNC488	Propylene	580	https://www.qianinfo.com/wz/dsgl/397.html	22.7533	114.58	Exact
CNC489	Propylene	100	https://wenku.baidu.com/view/0b87371f260c844769eae009581b6bd97e19bcfe.html	22.7461	114.605	Exact
CNC490	Propylene	370	https://wenku.baidu.com/view/0b87371f260c844769eae009581b6bd97e19bcfe.html	32.2458	118.802	Exact
CNC491	Propylene	600	https://www.qianinfo.com/wz/dsgl/397.html	31.9679	120.442	Exact
CNC492	Propylene	400	https://www.qianinfo.com/wz/dsgl/397.html	32.2347	118.775	Exact
CNC493	Propylene	500	https://www.qianinfo.com/wz/dsgl/397.html	41.8259	124.041	Exact
CNC494	Propylene	120	https://www.sohu.com/a/335510888_617351	32.1447	119.971	Approximate
CNC495	Propylene	300	https://www.163.com/dy/article/FEU2R48A05509P99.html	43.8374	87.5074	Approximate
CNC496	Propylene	100	https://wenku.baidu.com/view/0b87371f260c844769eae009581b6bd97e19bcfe.html	36.8454	119.359	Approximate
CNC497	Propylene	210	https://wenku.baidu.com/view/0b87371f260c844769eae009581b6bd97e19bcfe.html	37.329	118.316	Exact
CNC498	Propylene	100	https://wenku.baidu.com/view/0b87371f260c844769eae009581b6bd97e19bcfe.html	30.653	114.441	Exact
CNC499	Propylene	220	https://wenku.baidu.com/view/f8f36d0083c758f5f61fb7360b4c2e3f56272541.html	36.9	118.094	Exact
CNC500	Propylene	700	https://wenku.baidu.com/view/f8f36d0083c758f5f61fb7360b4c2e3f56272541.html	34.6191	119.518	Approximate
CNC501	Propylene	300	https://wenku.baidu.com/view/0b87371f260c844769eae009581b6bd97e19bcfe.html	35.0966	119.251	Approximate
CNC502	Propylene	250	https://www.oilchem.net/	41.7878	123.26	Exact
CNC503	Propylene	500	https://www.qianinfo.com/wz/dsgl/397.html	37.5055	116.257	Exact
CNC504	Propylene	200	https://wenku.baidu.com/view/0b87371f260c844769eae009581b6bd97e19bcfe.html	34.9106	112.6	Exact
CNC505	Propylene	120	https://wenku.baidu.com/view/0b87371f260c844769eae009581b6bd97e19bcfe.html	36.6938	117.159	Exact
CNC506	Propylene	390	https://www.docin.com/p-2294431960.html	30.6108	121.034	Exact
CNC507	Propylene	450	https://www.163.com/dy/article/FEU2R48A05509P99.html	30.6018	121.106	Approximate
CNC508	Propylene	900	https://www.sohu.com/a/295570961_617351	30.7359	120.89	Exact
CNC509	Propylene	600	https://wenku.baidu.com/view/f8f36d0083c758f5f61fb7360b4c2e3f56272541.html	29.9819	121.678	Exact
CNC510	Propylene	200	https://baijiahao.baidu.com/s?id=1653765925591507771&wfr=spider&for=pc	29.9749	121.668	Exact
CNC511	Propylene	700	https://baijiahao.baidu.com/s?id=1653765925591507771&wfr=spider&for=pc	29.9723	121.673	Exact
CNC512	Propylene	210	https://wenku.baidu.com/view/0b87371f260c844769eae009581b6bd97e19bcfe.html	19.7621	109.176	Exact
CNC513	Propylene	450	https://wenku.baidu.com/view/f8f36d0083c758f5f61fb7360b4c2e3f56272541.html	36.7403	118.16	Exact
CNC514	Propylene	600	https://wenku.baidu.com/view/f8f36d0083c758f5f61fb7360b4c2e3f56272541.html	38.0219	117.866	Approximate
CNC515	Propylene	430	https://wenku.baidu.com/view/0b87371f260c844769eae009581b6bd97e19bcfe.html	39.7296	115.963	Exact
CNC516	Propylene	610	https://www.qianinfo.com/wz/dsgl/397.html	44.3591	84.8684	Exact
CNC517	Propylene	100	https://wenku.baidu.com/view/0b87371f260c844769eae009581b6bd97e19bcfe.html	35.2199	115.562	Exact
CNC518	Propylene	300	https://www.oilchem.net/	41.3416	122.165	Exact
CNC519	Propylene	410	https://www.qianinfo.com/wz/dsgl/397.html	34.6093	119.498	Approximate
CNC520	Propylene	300	https://www.docin.com/p-2294431960.html	40.5815	109.884	Exact
CNC521	Propylene	1000	https://www.qianinfo.com/wz/dsgl/397.html	38.1739	106.611	Exact
CNC522	Propylene	400	https://www.sohu.com/a/359002417_100273878	38.1805	106.628	Exact
CNC523	Propylene	360	https://www.qianinfo.com/wz/dsgl/397.html	43.8632	87.6502	Approximate
CNC524	Propylene	380	https://www.sohu.com/a/279471718_100199292	38.6386	109.992	Approximate
CNC525	Propylene	300	https://wenku.baidu.com/view/0b87371f260c844769eae009581b6bd97e19bcfe.html	37.404	118.685	Exact
CNC526	Propylene	200	https://wenku.baidu.com/view/0b87371f260c844769eae009581b6bd97e19bcfe.html	37.4053	118.689	Exact
CNC527	Propylene	550	https://www.qianinfo.com/wz/dsgl/397.html	25.1777	118.937	Exact
CNC528	Propylene	450	https://www.qianinfo.com/wz/dsgl/397.html	30.089	120.652	Exact
CNC529	Propylene	800	https://www.docin.com/p-2294431960.html	22.9823	114.208	Approximate
CNC530	Propylene	500	https://www.qianinfo.com/wz/dsgl/397.html	21.5771	110.965	Exact
CNC531	Propylene	190	https://wenku.baidu.com/view/0b87371f260c844769eae009581b6bd97e19bcfe.html	31.0367	112.231	Exact
CNC532	Propylene	300	https://www.docin.com/p-2294431960.html	34.897	109.698	Approximate
CNC533	Propylene	310	https://www.docin.com/p-2294431960.html	40.8905	122.038	Approximate
CNC534	Propylene	300	https://www.oilchem.net/	41.2192	123.211	Approximate
CNC535	Propylene	1200	https://www.hzeyun.com/detail/2506874	29.9173	121.893	Exact
CNC536	Propylene	900	https://wenku.baidu.com/view/f8f36d0083c758f5f61fb7360b4c2e3f56272541.html	36.8232	116.751	Exact
CNC537	Propylene	200	https://www.oilchem.net/	37.0402	117.916	Approximate
CNC538	Propylene	100	https://wenku.baidu.com/view/0b87371f260c844769eae009581b6bd97e19bcfe.html	41.1415	121.095	Exact
CNC539	Propylene	170	https://wenku.baidu.com/view/0b87371f260c844769eae009581b6bd97e19bcfe.html	40.8205	121.05	Exact
CNC540	Propylene	600	http://www.360doc.com/content/21/1030/18/71804609_1002058977.shtml	29.9825	121.659	Exact
CNC541	Propylene	520	http://www.360doc.com/content/21/1030/18/71804609_1002058977.shtml	29.9804	121.676	Exact
CNC542	Propylene	550	https://www.qianinfo.com/wz/dsgl/397.html	29.9784	121.662	Exact
CNC543	Propylene	60	https://www.oilchem.net/	34.3488	108.753	Approximate
CNC544	Propylene	200	https://www.docin.com/p-2294431960.html	34.6344	118.315	Exact
CNC545	Propylene	210	https://wenku.baidu.com/view/0b87371f260c844769eae009581b6bd97e19bcfe.html	36.0556	120.183	Exact
CNC546	Propylene	300	https://wenku.baidu.com/view/0b87371f260c844769eae009581b6bd97e19bcfe.html	36.2138	120.366	Exact
CNC547	Propylene	400	https://www.hzeyun.com/detail/2502973	36.5487	101.524	Exact
CNC548	Propylene	160	https://www.docin.com/p-2294431960.html	36.5584	101.502	Exact
CNC549	Propylene	200	https://wenku.baidu.com/view/0b87371f260c844769eae009581b6bd97e19bcfe.html	37.1995	118.845	Exact
CNC550	Propylene	100	https://wenku.baidu.com/view/0b87371f260c844769eae009581b6bd97e19bcfe.html	36.7797	118.163	Exact
CNC551	Propylene	400	https://www.qianinfo.com/wz/dsgl/397.html	36.7776	118.174	Exact

## Sheet: RMEChemicalPlants
CODE	CHEMICAL	CAPACITY_kT_per_year	CAPACITY_SOURCE	LAT	LONG	SITE_LOCATION_TYPE
MEC001	Urea	620.5	https://d2zo35mdb530wx.cloudfront.net/_legacy/UCPthyssenkruppBAISOUWebsiteUhdeFertilizerTechnologies/assets.files/fertilizer/tk-fertilizer-technology-references-2019-v02.pdf	26.144	50.6436	Exact
MEC002	Urea	1186.25	http://www.lufc.ir/en/home	32.0223	50.6643	Exact
MEC003	Urea	1155	https://en.shana.ir/news/287115/Hengam-Petchem-Plant-70-Complete	27.5824	52.5193	Exact
MEC004	Urea	1186.25	https://d2zo35mdb530wx.cloudfront.net/_legacy/UCPthyssenkruppBAISOUWebsiteUhdeFertilizerTechnologies/assets.files/fertilizer/tk-fertilizer-technology-references-2019-v02.pdf	27.5651	52.543	Exact
MEC005	Urea	657	https://d2zo35mdb530wx.cloudfront.net/_legacy/UCPthyssenkruppBAISOUWebsiteUhdeFertilizerTechnologies/assets.files/fertilizer/tk-fertilizer-technology-references-2019-v02.pdf	30.4353	49.0955	Exact
MEC006	Urea	638.75	https://d2zo35mdb530wx.cloudfront.net/_legacy/UCPthyssenkruppBAISOUWebsiteUhdeFertilizerTechnologies/assets.files/fertilizer/tk-fertilizer-technology-references-2019-v02.pdf	29.091	48.1101	Exact
MEC007	Urea	1277.5	https://d2zo35mdb530wx.cloudfront.net/_legacy/UCPthyssenkruppBAISOUWebsiteUhdeFertilizerTechnologies/assets.files/fertilizer/tk-fertilizer-technology-references-2019-v02.pdf	24.487	56.6146	Exact
MEC008	Urea	923.45	https://d2zo35mdb530wx.cloudfront.net/_legacy/UCPthyssenkruppBAISOUWebsiteUhdeFertilizerTechnologies/assets.files/fertilizer/tk-fertilizer-technology-references-2019-v02.pdf	22.6391	59.4274	Exact
MEC009	Urea	524.816	https://www.qafco.qa/about/our-plants	24.9209	51.5671	Exact
MEC010	Urea	492.887	https://www.qafco.qa/about/our-plants	24.9194	51.5655	Exact
MEC011	Urea	782.729	https://www.qafco.qa/about/our-plants	24.9189	51.565	Exact
MEC012	Urea	1152.24	https://www.qafco.qa/about/our-plants	24.9198	51.5636	Exact
MEC013	Urea	1323.66	https://www.qafco.qa/about/our-plants	24.9211	51.5622	Exact
MEC014	Urea	1323.66	https://www.qafco.qa/about/our-plants	24.9177	51.5659	Exact
MEC015	Urea	80	https://www.sabic.com/en/news/3932-sabic-to-produce-technical-grade-urea-in-support-of-cleaner-diesel-technology	27.0661	49.5589	Exact
MEC016	Urea	720	https://www.riyadcapital.com/en/Images/SAFCO_TC_05_31_2018%20EN_tcm10-15415.PDF	27.0712	49.5613	Exact
MEC017	Urea	600	https://www.riyadcapital.com/en/Images/SAFCO_TC_05_31_2018%20EN_tcm10-15415.PDF	27.0712	49.5613	Exact
MEC018	Urea	1100	https://www.riyadcapital.com/en/Images/SAFCO_TC_05_31_2018%20EN_tcm10-15415.PDF	27.0712	49.5613	Exact
MEC019	Urea	1100	https://www.riyadcapital.com/en/Images/SAFCO_TC_05_31_2018%20EN_tcm10-15415.PDF	27.0712	49.5613	Exact
MEC020	Urea	300	https://english.enabbaladi.net/archives/2019/01/general-fertilizers-company-from-syrian-stumbling-and-iranian-competition-to-russian-takeover/	34.7424	36.6526	Approximate
MEC021	Urea	1277.5	https://d2zo35mdb530wx.cloudfront.net/_legacy/UCPthyssenkruppBAISOUWebsiteUhdeFertilizerTechnologies/assets.files/fertilizer/tk-fertilizer-technology-references-2019-v02.pdf	24.1198	52.7227	Exact
MEC022	Urea	975	https://www.stamicarbon.com/downloads?f%5B0%5D=category%3A6	37.3673	54.5117	Exact
MEC023	Urea	975	https://www.stamicarbon.com/downloads?f%5B0%5D=category%3A6	36.4597	48.326	Exact
MEC024	Urea	600	https://www.stamicarbon.com/downloads?f%5B0%5D=category%3A6	34.3553	47.4554	Exact
MEC025	Methanol	2300	ICIS capacity reports	27.574	52.5249	Exact
MEC026	Methanol	1700	ICIS capacity reports	27.5934	52.5138	Exact
MEC027	Methanol	1650	ICIS capacity reports	33.7175	46.2938	Exact
MEC028	Methanol	1650	ICIS capacity reports	28.7799	52.675	Exact
MEC029	Methanol	1200	ICIS capacity reports	29.2887	51.2219	Exact
MEC030	Methanol	1050	ICIS capacity reports	27.5723	52.5396	Exact
MEC031	Methanol	1000	ICIS capacity reports	32.5867	47.403	Exact
MEC032	Methanol	990	https://www.icis.com/explore/resources/news/2014/07/02/9797783/qatar-fuel-additives-to-increase-methanol-mtbe-capacity-contractor/	30.4113	50.7465	Exact
MEC033	Methanol	700	https://www.icis.com/explore/resources/news/2019/09/17/10418063/asia-methanol-higher-on-potential-saudi-arabia-supply-issues	30.4506	49.0826	Exact
MEC034	Methanol	720	https://www.icis.com/explore/resources/news/2019/09/17/10418063/asia-methanol-higher-on-potential-saudi-arabia-supply-issues	34.0195	49.4615	Exact
MEC035	Methanol	850	https://www.icis.com/explore/resources/news/2019/09/17/10418063/asia-methanol-higher-on-potential-saudi-arabia-supply-issues	27.5416	52.5554	Exact
MEC036	Methanol	850	https://www.icis.com/explore/resources/news/2019/09/17/10418063/asia-methanol-higher-on-potential-saudi-arabia-supply-issues	24.125	52.745	Exact
MEC037	Methanol	233	https://www.icis.com/explore/resources/news/2019/09/17/10418063/asia-methanol-higher-on-potential-saudi-arabia-supply-issues	24.13	52.745	Exact
MEC038	Methanol	1070	https://www.icis.com/explore/resources/news/2019/09/17/10418063/asia-methanol-higher-on-potential-saudi-arabia-supply-issues	24.115	52.76	Exact
MEC039	Methanol	420	https://www.icis.com/explore/resources/news/2019/09/17/10418063/asia-methanol-higher-on-potential-saudi-arabia-supply-issues	24.1219	52.7519	Exact
MEC040	Methanol	780	https://www.icis.com/explore/resources/news/2019/09/17/10418063/asia-methanol-higher-on-potential-saudi-arabia-supply-issues	29.025	48.14	Exact
MEC041	Methanol	660	http://khargpetrochemical.ir/index.php/en/2013-12-24-11-36-5/products	29.025	48.145	Exact
MEC042	Ethylene	1000	https://www.researchgate.net/publication/305390632_Polyolefin_and_olefin_production_in_Iran_Current_and_future_capacities	27.574	52.5249	Exact
MEC043	Ethylene	1200	https://www.researchgate.net/publication/305390632_Polyolefin_and_olefin_production_in_Iran_Current_and_future_capacities	27.5934	52.5138	Exact
MEC044	Ethylene	458	https://www.researchgate.net/publication/305390632_Polyolefin_and_olefin_production_in_Iran_Current_and_future_capacities	33.7175	46.2938	Exact
MEC045	Ethylene	1000	https://www.researchgate.net/publication/305390632_Polyolefin_and_olefin_production_in_Iran_Current_and_future_capacities	28.7799	52.675	Exact
MEC046	Ethylene	500	https://www.researchgate.net/publication/305390632_Polyolefin_and_olefin_production_in_Iran_Current_and_future_capacities	29.2887	51.2219	Exact
MEC047	Ethylene	1000	https://www.researchgate.net/publication/305390632_Polyolefin_and_olefin_production_in_Iran_Current_and_future_capacities	27.5723	52.5396	Exact
MEC048	Ethylene	500	https://www.researchgate.net/publication/305390632_Polyolefin_and_olefin_production_in_Iran_Current_and_future_capacities	32.5867	47.403	Exact
MEC049	Ethylene	1000	https://www.researchgate.net/publication/305390632_Polyolefin_and_olefin_production_in_Iran_Current_and_future_capacities	30.4113	50.7465	Exact
MEC050	Ethylene	520	https://www.researchgate.net/publication/305390632_Polyolefin_and_olefin_production_in_Iran_Current_and_future_capacities	30.4506	49.0826	Exact
MEC051	Ethylene	306	https://www.researchgate.net/publication/305390632_Polyolefin_and_olefin_production_in_Iran_Current_and_future_capacities	34.0195	49.4615	Exact
MEC052	Ethylene	1000	https://www.researchgate.net/publication/305390632_Polyolefin_and_olefin_production_in_Iran_Current_and_future_capacities	27.5416	52.5554	Exact
MEC053	Ethylene	1500	Oberschelp, et al., unpublished	24.125	52.745	Exact
MEC054	Ethylene	1450	Oberschelp, et al., unpublished	24.13	52.745	Exact
MEC055	Ethylene	600	Oberschelp, et al., unpublished	24.115	52.76	Exact
MEC056	Ethylene	1800	https://www.ogj.com/refining-processing/petrochemicals/article/14074968/borouge-lets-contract-for-ruwais-petrochemical-expansion	24.1219	52.7519	Exact
MEC057	Ethylene	850	Oberschelp, et al., unpublished	29.025	48.14	Exact
MEC058	Ethylene	800	Oberschelp, et al., unpublished	29.025	48.145	Exact
MEC059	Ethylene	411	https://www.researchgate.net/publication/305390632_Polyolefin_and_olefin_production_in_Iran_Current_and_future_capacities	30.4791	49.0957	Exact
MEC060	Ethylene	1321	https://www.researchgate.net/publication/305390632_Polyolefin_and_olefin_production_in_Iran_Current_and_future_capacities	27.5477	52.5519	Exact
MEC061	Ethylene	1000	https://www.researchgate.net/publication/305390632_Polyolefin_and_olefin_production_in_Iran_Current_and_future_capacities	27.5715	52.5251	Exact
MEC062	Ethylene	1100	https://www.researchgate.net/publication/305390632_Polyolefin_and_olefin_production_in_Iran_Current_and_future_capacities	30.4856	49.0949	Exact
MEC063	Ethylene	500	https://www.researchgate.net/publication/305390632_Polyolefin_and_olefin_production_in_Iran_Current_and_future_capacities	27.5764	52.5242	Exact
MEC064	Ethylene	880	Oberschelp, et al., unpublished	24.4629	56.6222	Exact
MEC065	Ethylene	1300	https://www.jgc.com/en/projects/021.html	22.7157	39.02	Exact
MEC066	Ethylene	1900	https://www.plasticstoday.com/business/chevron-phillips-qatar-petroleum-build-largest-ethane-cracker-middle-east	24.8961	51.5492	Exact
MEC067	Ethylene	1500	https://www.spglobal.com/platts/en/market-insights/topics/recycled-plastics	26.9429	49.48	Exact
MEC068	Ethylene	136	https://www.researchgate.net/publication/305390632_Polyolefin_and_olefin_production_in_Iran_Current_and_future_capacities	38.0707	46.1482	Exact
MEC069	Ethylene	1300	Oberschelp, et al., unpublished	25.9	51.525	Exact
MEC070	Ethylene	720	Oberschelp, et al., unpublished	24.895	51.545	Exact
MEC071	Ethylene	500	Oberschelp, et al., unpublished	24.895	51.545	Exact
MEC072	Ethylene	1350	Oberschelp, et al., unpublished	27.03	49.52	Exact
MEC073	Ethylene	1300	Oberschelp, et al., unpublished	27.06	49.575	Exact
MEC074	Ethylene	1300	Oberschelp, et al., unpublished	23.98	38.255	Exact
MEC075	Ethylene	1200	Oberschelp, et al., unpublished	27.035	49.56	Exact
MEC076	Ethylene	1045	Oberschelp, et al., unpublished	27.055	49.595	Exact
MEC077	Ethylene	1000	Oberschelp, et al., unpublished	27.045	49.55	Exact
MEC078	Ethylene	1000	Oberschelp, et al., unpublished	27.055	49.57	Exact
MEC079	Ethylene	875	Oberschelp, et al., unpublished	23.985	38.23	Exact
MEC080	Ethylene	830	Oberschelp, et al., unpublished	23.985	38.22	Exact
MEC081	Ethylene	800	Oberschelp, et al., unpublished	27.03	49.595	Exact
MEC082	Ethylene	800	Oberschelp, et al., unpublished	27.035	49.61	Exact
MEC083	Ethylene	800	Oberschelp, et al., unpublished	27.04	49.605	Exact
MEC084	Ethylene	650	Oberschelp, et al., unpublished	27.055	49.595	Exact
MEC085	BTX	296	http://petrofarhang.com/en/kian-petrochemical-co/	27.5914	52.5106	Exact
MEC086	BTX	200	https://www.nopc.co/Content/media/image/2019/03/205_orig.pdf	32.768	51.5033	Exact
MEC087	BTX	370	https://www.nopc.co/Content/media/image/2019/03/205_orig.pdf	30.4538	49.0871	Exact
MEC088	BTX	610	https://www.nopc.co/Content/media/image/2019/03/205_orig.pdf	30.4476	49.0896	Exact
MEC089	BTX	1280	https://www.sazeh.co.ir/Project/Details/4th-Aromatics-Plant	27.5543	52.5583	Exact
MEC090	BTX	1600	https://www.chemanager-online.com/en/news-opinions/headlines/adnoc-steams-ahead-ruwais-expansion	24.118	52.7281	Exact
MEC091	BTX	1029	https://www.refiningandpetrochemicalsme.com/news/article-6904-aromatics-oman-starts-commercial-production	24.4624	56.6219	Exact
MEC092	BTX	735	https://www.icis.com/explore/resources/news/2012/03/05/9537651/saudi-aramco-focuses-on-aromatics-in-its-petrochemicals-push/	23.9925	38.2403	Exact
MEC093	BTX	1400	https://www.constructionboxscore.com/project-news/kuwait-to-expand-al-zour-refinery-and-petrochemicals-with-uop-technology.aspx	28.7224	48.3697	Exact
MEC094	BTX	1700	https://www.argusmedia.com/pt/news/2057072-petrorabigh-to-shut-aromatics-unit-endfebruary	22.7098	39.0237	Exact
MEC095	BTX	125	https://www.icis.com/explore/resources/news/2012/03/05/9537651/saudi-aramco-focuses-on-aromatics-in-its-petrochemicals-push/	27.0324	49.6053	Exact
MEC096	BTX	325	https://www.icis.com/explore/resources/news/2012/03/05/9537651/saudi-aramco-focuses-on-aromatics-in-its-petrochemicals-push/	27.0523	49.6082	Exact
MEC097	BTX	840	https://www.icis.com/explore/resources/news/2012/03/05/9537651/saudi-aramco-focuses-on-aromatics-in-its-petrochemicals-push/	26.966	49.499	Exact
MEC098	BTX	840	https://www.icis.com/explore/resources/news/2012/03/05/9537651/saudi-aramco-focuses-on-aromatics-in-its-petrochemicals-push/	27.0384	49.5687	Exact
MEC099	BTX	109	https://www.icis.com/explore/resources/news/2012/03/05/9537651/saudi-aramco-focuses-on-aromatics-in-its-petrochemicals-push/	27.0263	49.5205	Exact
MEC100	BTX	1150	https://www.kpc.com.kw/press/kpc-speeches/Documents/Kuwait%20Petrochemicals%20A%20Growth%20Strategy.pdf	29.0283	48.1311	Exact
MEC101	BTX	250	https://www.spglobal.com/platts/en/market-insights/topics/recycled-plastics	23.9787	38.2568	Exact
MEC102	Propylene	327	https://www.researchgate.net/publication/305390632_Polyolefin_and_olefin_production_in_Iran_Current_and_future_capacities	27.5921	52.5151	Exact
MEC103	Propylene	124	https://www.researchgate.net/publication/305390632_Polyolefin_and_olefin_production_in_Iran_Current_and_future_capacities	33.7183	46.2939	Exact
MEC104	Propylene	81	https://www.researchgate.net/publication/305390632_Polyolefin_and_olefin_production_in_Iran_Current_and_future_capacities	32.5862	47.4035	Exact
MEC105	Propylene	500	https://www.ogj.com/refining-processing/refining/optimization/article/17296509/adnoc-commissions-pdh-unit-at-ruwais-integrated-complex	24.1152	52.7312	Exact
MEC106	Propylene	450	https://core.ac.uk/download/pdf/235050644.pdf	27.0418	49.5464	Exact
MEC107	Propylene	154	https://www.researchgate.net/publication/305390632_Polyolefin_and_olefin_production_in_Iran_Current_and_future_capacities	30.4474	49.0815	Exact
MEC108	Propylene	455	https://core.ac.uk/download/pdf/235050644.pdf	27.0059	49.5521	Exact
MEC109	Propylene	128	https://www.researchgate.net/publication/305390632_Polyolefin_and_olefin_production_in_Iran_Current_and_future_capacities	34.0165	49.4571	Exact
MEC110	Propylene	64	https://www.researchgate.net/publication/305390632_Polyolefin_and_olefin_production_in_Iran_Current_and_future_capacities	30.4475	49.092	Exact
MEC111	Propylene	752	https://borouge.com/MediaCentre/Lists/News/DispformCustom.aspx?id=157	24.125	52.745	Exact
MEC112	Propylene		https://www.ogj.com/refining-processing/petrochemicals/article/14074968/borouge-lets-contract-for-ruwais-petrochemical-expansion	24.1189	52.752	Exact
MEC113	Propylene	305	https://www.researchgate.net/publication/305390632_Polyolefin_and_olefin_production_in_Iran_Current_and_future_capacities	27.5476	52.5494	Exact
MEC114	Propylene	200	https://www.researchgate.net/publication/305390632_Polyolefin_and_olefin_production_in_Iran_Current_and_future_capacities	30.4803	49.0906	Exact
MEC115	Propylene	450	https://www.researchgate.net/publication/305390632_Polyolefin_and_olefin_production_in_Iran_Current_and_future_capacities	27.5763	52.5325	Exact
MEC116	Propylene	740	https://www.spglobal.com/platts/en/market-insights/topics/recycled-plastics	27.0325	49.5663	Exact
MEC117	Propylene	420	https://core.ac.uk/download/pdf/235050644.pdf	23.9985	38.2362	Exact
MEC118	Propylene	900	https://www.jgc.com/en/projects/021.html	22.7143	39.0185	Exact
MEC119	Propylene	400	https://www.argusmedia.com/en/news/2199720-saudis-sadara-conducts-turnaround-on-jubail-crackers	26.9451	49.483	Exact
MEC120	Propylene	450	https://www.researchgate.net/publication/305390632_Polyolefin_and_olefin_production_in_Iran_Current_and_future_capacities	35.6854	51.3743	Approximate
MEC121	Propylene	430	https://www.spglobal.com/platts/en/market-insights/topics/recycled-plastics	27.031	49.5237	Exact
MEC122	Propylene	340	https://www.hydrocarbons-technology.com/projects/sohar/	24.4825	56.6083	Exact
MEC123	Propylene	455	https://core.ac.uk/download/pdf/235050644.pdf	27.0451	49.5864	Exact
MEC124	Propylene	58	https://www.researchgate.net/publication/305390632_Polyolefin_and_olefin_production_in_Iran_Current_and_future_capacities	38.0688	46.1496	Exact
MEC125	Propylene	400	https://www.spglobal.com/platts/en/market-insights/topics/recycled-plastics	23.9825	38.2604	Exact
MEC126	Propylene	260	https://www.ogj.com/refining-processing/article/17264254/yanpet-completes-yanbu-plant-expansion	23.9863	38.2284	Exact
MEC127	Propylene	150	https://www.researchgate.net/publication/305390632_Polyolefin_and_olefin_production_in_Iran_Current_and_future_capacities	30.4914	49.0949	Exact

## Sheet: CNCementKilns
CODE	TYPE	CAPACITY_kT_CLINKER_PER_YEAR	CAPACITY_SOURCE	LAT	LONG	COORDINATE_QUALITY
CCM001	Cement	775	http://www.chinaconch.com/	42.5728	94.1275	Approximate
CCM002	Cement	2790	http://www.chinaconch.com/	34.7511	107.033	Approximate
CCM003	Cement	2790	http://www.chinaconch.com/	34.5565	108.504	Exact
CCM004	Cement	2790	http://www.chinaconch.com/	34.6566	108.217	Exact
CCM005	Cement	1395	http://www.chinaconch.com/	34.4173	107.621	Exact
CCM006	Cement	1395	http://www.chinaconch.com/	34.5253	107.075	Approximate
CCM007	Cement	1395	http://www.chinaconch.com/	34.9657	109.008	Approximate
CCM008	Cement	775	http://www.chinaconch.com/	30.0655	96.9662	Approximate
CCM009	Cement	2790	http://www.chinaconch.com/	35.3803	103.259	Exact
CCM010	Cement	2790	http://www.chinaconch.com/	35.4314	106.66	Exact
CCM011	Cement	2790	http://www.chinaconch.com/	32.6353	105.87	Exact
CCM012	Cement	2790	http://www.chinaconch.com/	30.849	107.325	Exact
CCM013	Cement	775	http://www.chinaconch.com/	32.3089	106.824	Exact
CCM014	Cement	1395	http://www.chinaconch.com/	32.3426	106.784	Exact
CCM015	Cement	1488	http://www.chinaconch.com/	30.323	107.361	Exact
CCM016	Cement	4185	http://www.chinaconch.com/	30.3085	108	Exact
CCM017	Cement	775	http://www.chinaconch.com/	24.6272	98.7622	Exact
CCM018	Cement	700	http://www.chinaconch.com/	23.7426	105.406	Exact
CCM019	Cement	775	http://www.chinaconch.com/	24.7824	103.272	Exact
CCM020	Cement	1395	http://www.chinaconch.com/	25.0483	99.2451	Exact
CCM021	Cement	2790	http://www.chinaconch.com/	23.7169	103.77	Exact
CCM022	Cement	1240	http://www.chinaconch.com/	24.6711	97.8519	Exact
CCM023	Cement	3600	http://www.chinaconch.com/	25.6383	110.656	Exact
CCM024	Cement	3600	http://www.chinaconch.com/	22.7127	109.813	Exact
CCM025	Cement	5400	http://www.chinaconch.com/	22.6525	107.911	Exact
CCM026	Cement	2635	http://www.chinaconch.com/	22.7292	110.378	Exact
CCM027	Cement	1240	http://www.chinaconch.com/	23.1278	107.665	Exact
CCM028	Cement	1100	http://www.chinaconch.com/	24.2059	106.611	Exact
CCM029	Cement	7200	http://www.chinaconch.com/	24.2593	113.428	Exact
CCM030	Cement	3100	http://www.chinaconch.com/	24.1736	112.766	Exact
CCM031	Cement	5800	http://www.chinaconch.com/	22.3693	111.957	Exact
CCM032	Cement	2700	http://www.chinaconch.com/	24.1044	112.784	Exact
CCM033	Cement	2790	http://www.chinaconch.com/	26.6129	107.242	Exact
CCM034	Cement	4185	http://www.chinaconch.com/	26.6635	106.356	Exact
CCM035	Cement	2790	http://www.chinaconch.com/	27.7505	106.957	Exact
CCM036	Cement	2170	http://www.chinaconch.com/	26.1667	105.67	Exact
CCM037	Cement	1000	http://www.chinaconch.com/	25.1228	105.281	Approximate
CCM038	Cement	2790	http://www.chinaconch.com/	24.3374	109.41	Approximate
CCM039	Cement	1800	http://www.chinaconch.com/	26.5516	105.019	Exact
CCM040	Cement	2790	http://www.chinaconch.com/	27.3937	112.007	Exact
CCM041	Cement	3100	http://www.chinaconch.com/	27.8267	111.178	Exact
CCM042	Cement	2945	http://www.chinaconch.com/	29.6066	111.28	Exact
CCM043	Cement	1800	http://www.chinaconch.com/	29.4816	113.436	Approximate
CCM044	Cement	1800	http://www.chinaconch.com/	28.2438	111.72	Approximate
CCM045	Cement	1395	http://www.chinaconch.com/	27.1823	111.418	Approximate
CCM046	Cement	2700	http://www.chinaconch.com/	26.6864	110.681	Exact
CCM047	Cement	1800	http://www.chinaconch.com/	27.7449	112.028	Exact
CCM048	Cement	3100	http://www.chinaconch.com/	26.6793	111.815	Exact
CCM049	Cement	1395	http://www.chinaconch.com/	25.1723	111.545	Exact
CCM050	Cement	1800	http://www.chinaconch.com/	27.8548	114.757	Exact
CCM051	Cement	4185	http://www.chinaconch.com/	28.623	117.384	Exact
CCM052	Cement	3875	http://www.chinaconch.com/	25.4317	114.914	Exact
CCM053	Cement	4400	http://www.chinaconch.com/	30.6872	118.892	Exact
CCM054	Cement	14500	http://www.chinaconch.com/	30.8426	117.78	Exact
CCM055	Cement	2780	http://www.chinaconch.com/	31.23	118.396	Exact
CCM056	Cement	7500	http://www.chinaconch.com/	31.1327	118.013	Exact
CCM057	Cement	11000	http://www.chinaconch.com/	30.7235	117.397	Exact
CCM058	Cement	10850	http://www.chinaconch.com/	30.4596	117.238	Exact
CCM059	Cement	3000	http://www.chinaconch.com/	30.6245	116.87	Exact
CCM060	Cement	3100	http://www.chinaconch.com/	30.7993	118.982	Exact
CCM061	Cement	15000	http://www.chinaconch.com/	31.1433	118.181	Exact
CCM062	Cement	3100	http://www.chinaconch.com/	32.164	118.218	Exact
CCM063	Cement	3800	http://www.chinaconch.com/	33.9694	117.128	Exact
CCM064	Cement	5400	http://www.chinaconch.com/	32.4809	117.17	Exact
CCM065	Cement	3720	http://www.chinaconch.com/	32.1604	119.045	Exact
CCM066	Cement	3100	http://www.chinaconch.com/	29.3275	119.054	Exact
CCM067	Cement	1395	http://www.chinaconch.com/	35.6533	117.396	Approximate
CCM068	Cement	1860	https://www.ccement.com/zhuanti/2016paihang/	40.653	108.798	Exact
CCM069	Cement	1550	https://www.ccement.com/zhuanti/2016paihang/	39.3908	107.048	Exact
CCM070	Cement	1550	https://www.ccement.com/zhuanti/2016paihang/	42.8834	120.7	Exact
CCM071	Cement	3596	https://www.ccement.com/zhuanti/2016paihang/	41.7136	113.123	Exact
CCM072	Cement	775	https://www.ccement.com/zhuanti/2016paihang/	43.9817	116.111	Exact
CCM073	Cement	930	https://www.ccement.com/zhuanti/2016paihang/	37.4643	114.613	Exact
CCM074	Cement	930	https://www.ccement.com/zhuanti/2016paihang/	37.4643	114.613	Exact
CCM075	Cement	992	https://www.ccement.com/zhuanti/2016paihang/	37.5988	114.939	Exact
CCM076	Cement	1550	https://www.ccement.com/zhuanti/2016paihang/	37.4754	116.245	Exact
CCM077	Cement	2232	https://www.ccement.com/zhuanti/2016paihang/	35.6734	117.324	Exact
CCM078	Cement	1550	https://www.ccement.com/zhuanti/2016paihang/	35.6156	117.08	Exact
CCM079	Cement	201	https://www.ccement.com/zhuanti/2016paihang/	35.6296	117.266	Exact
CCM080	Cement	1550	https://www.ccement.com/zhuanti/2016paihang/	34.9705	117.902	Exact
CCM081	Cement	1550	https://www.ccement.com/zhuanti/2016paihang/	35.4056	117.635	Exact
CCM082	Cement	1550	https://www.ccement.com/zhuanti/2016paihang/	35.5661	118.465	Approximate
CCM083	Cement	3100	https://www.ccement.com/zhuanti/2016paihang/	35.658	118.836	Exact
CCM084	Cement	1550	https://www.ccement.com/zhuanti/2016paihang/	35.9409	116.47	Approximate
CCM085	Cement	1550	https://www.ccement.com/zhuanti/2016paihang/	36.2014	117.22	Exact
CCM086	Cement	2325	https://www.ccement.com/zhuanti/2016paihang/	36.2112	117.205	Exact
CCM087	Cement	1550	https://www.ccement.com/zhuanti/2016paihang/	36.2074	117.206	Exact
CCM088	Cement	3720	https://www.ccement.com/zhuanti/2016paihang/	36.759	118.418	Exact
CCM089	Cement	3565	https://www.ccement.com/zhuanti/2016paihang/	35.0615	116.297	Exact
CCM090	Cement	1550	https://www.ccement.com/zhuanti/2016paihang/	34.925	117.175	Exact
CCM091	Cement	3100	https://www.ccement.com/zhuanti/2016paihang/	34.9322	117.53	Exact
CCM092	Cement	3100	https://www.ccement.com/zhuanti/2016paihang/	36.6383	117.953	Exact
CCM093	Cement	775	https://www.ccement.com/zhuanti/2016paihang/	39.3347	112.433	Approximate
CCM094	Cement	1550	https://www.ccement.com/zhuanti/2016paihang/	37.8694	112.422	Exact
CCM095	Cement	1550	https://www.ccement.com/zhuanti/2016paihang/	32.8447	117.306	Exact
CCM096	Cement	1550	https://www.ccement.com/zhuanti/2016paihang/	32.8159	117.311	Exact
CCM097	Cement	1550	https://www.ccement.com/zhuanti/2016paihang/	31.9813	118.97	Exact
CCM098	Cement	3100	https://www.ccement.com/zhuanti/2016paihang/	34.4185	117.469	Exact
CCM099	Cement	7200	https://www.ccement.com/zhuanti/2016paihang/	34.4717	117.449	Exact
CCM100	Cement	1240	https://www.ccement.com/zhuanti/2016paihang/	36.0672	113.835	Exact
CCM101	Cement	1550	https://www.ccement.com/zhuanti/2016paihang/	36.0672	113.835	Exact
CCM102	Cement	1240	https://www.ccement.com/zhuanti/2016paihang/	35.0968	112.565	Approximate
CCM103	Cement	1550	https://www.ccement.com/zhuanti/2016paihang/	34.6863	112.398	Exact
CCM104	Cement	2418	https://www.ccement.com/zhuanti/2016paihang/	34.7414	112.059	Exact
CCM105	Cement	992	https://www.ccement.com/zhuanti/2016paihang/	32.6558	112.046	Exact
CCM106	Cement	992	https://www.ccement.com/zhuanti/2016paihang/	33.3447	111.505	Exact
CCM107	Cement	1085	https://www.ccement.com/zhuanti/2016paihang/	33.1024	112.591	Exact
CCM108	Cement	2790	https://www.ccement.com/zhuanti/2016paihang/	33.0811	112.216	Exact
CCM109	Cement	1550	https://www.ccement.com/zhuanti/2016paihang/	34.3601	113.129	Exact
CCM110	Cement	1550	https://www.ccement.com/zhuanti/2016paihang/	34.3761	113.066	Exact
CCM111	Cement	1550	https://www.ccement.com/zhuanti/2016paihang/	35.871	114.166	Exact
CCM112	Cement	1550	https://www.ccement.com/zhuanti/2016paihang/	34.7863	113.697	Exact
CCM113	Cement	3100	https://www.ccement.com/zhuanti/2016paihang/	34.5296	112.24	Exact
CCM114	Cement	1550	https://www.ccement.com/zhuanti/2016paihang/	34.781	111.929	Exact
CCM115	Cement	1550	https://www.ccement.com/zhuanti/2016paihang/	35.4372	113.94	Exact
CCM116	Cement	3100	https://www.ccement.com/zhuanti/2016paihang/	32.781	114.047	Exact
CCM117	Cement	775	https://www.ccement.com/zhuanti/2016paihang/	31.7577	120.128	Exact
CCM118	Cement	775	https://www.ccement.com/zhuanti/2016paihang/	31.3675	119.583	Exact
CCM119	Cement	1550	https://www.ccement.com/zhuanti/2016paihang/	31.3217	119.65	Exact
CCM120	Cement	1550	https://www.ccement.com/zhuanti/2016paihang/	31.5708	119.537	Exact
CCM121	Cement	2170	https://www.ccement.com/zhuanti/2016paihang/	31.2367	119.809	Exact
CCM122	Cement	1550	https://www.ccement.com/zhuanti/2016paihang/	22.3818	107.365	Approximate
CCM123	Cement	3100	https://www.ccement.com/zhuanti/2016paihang/	22.7319	109.408	Exact
CCM124	Cement	1550	https://www.ccement.com/zhuanti/2016paihang/	24.9239	110.83	Exact
CCM125	Cement	775	https://www.ccement.com/zhuanti/2016paihang/	28.6306	109.948	Approximate
CCM126	Cement	1550	https://www.ccement.com/zhuanti/2016paihang/	28.0975	112.923	Exact
CCM127	Cement	1767	https://www.ccement.com/zhuanti/2016paihang/	28.2172	112.69	Exact
CCM128	Cement	775	https://www.ccement.com/zhuanti/2016paihang/	32.1136	118.703	Exact
CCM129	Cement	1550	https://www.ccement.com/zhuanti/2016paihang/	29.2004	111.626	Exact
CCM130	Cement	620	https://www.ccement.com/zhuanti/2016paihang/	29.0719	110.362	Exact
CCM131	Cement	1550	https://www.ccement.com/zhuanti/2016paihang/	28.5273	112.154	Approximate
CCM132	Cement	1550	https://www.ccement.com/zhuanti/2016paihang/	28.2114	113.306	Exact
CCM133	Cement	465	https://www.ccement.com/zhuanti/2016paihang/	26.7462	112.088	Exact
CCM134	Cement	2325	https://www.ccement.com/zhuanti/2016paihang/	26.3377	112.819	Exact
CCM135	Cement	775	https://www.ccement.com/zhuanti/2016paihang/	25.5706	113.011	Exact
CCM136	Cement	1550	https://www.ccement.com/zhuanti/2016paihang/	26.7751	112.582	Exact
CCM137	Cement	1550	https://www.ccement.com/zhuanti/2016paihang/	25.955	113.247	Exact
CCM138	Cement	775	https://www.ccement.com/zhuanti/2016paihang/	27.1172	111.032	Approximate
CCM139	Cement	2945	https://www.ccement.com/zhuanti/2016paihang/	27.898	112.542	Exact
CCM140	Cement	1550	https://www.ccement.com/zhuanti/2016paihang/	27.1231	111.498	Exact
CCM141	Cement	1550	https://www.ccement.com/zhuanti/2016paihang/	28.0918	114.456	Exact
CCM142	Cement	2325	https://www.ccement.com/zhuanti/2016paihang/	28.2032	115.724	Exact
CCM143	Cement	1550	https://www.ccement.com/zhuanti/2016paihang/	29.1525	114.637	Exact
CCM144	Cement	1550	https://www.ccement.com/zhuanti/2016paihang/	26.4014	115.774	Exact
CCM145	Cement	1550	https://www.ccement.com/zhuanti/2016paihang/	27.5719	116.638	Approximate
CCM146	Cement	992	https://www.ccement.com/zhuanti/2016paihang/	27.3732	114.673	Exact
CCM147	Cement	1550	https://www.ccement.com/zhuanti/2016paihang/	27.0633	115.748	Exact
CCM148	Cement	527	https://www.ccement.com/zhuanti/2016paihang/	26.81	114.865	Exact
CCM149	Cement	1550	https://www.ccement.com/zhuanti/2016paihang/	28.7143	118.346	Approximate
CCM150	Cement	775	https://www.ccement.com/zhuanti/2016paihang/	27.6659	114.083	Exact
CCM151	Cement	2170	https://www.ccement.com/zhuanti/2016paihang/	31.2772	117.342	Exact
CCM152	Cement	1550	https://www.ccement.com/zhuanti/2016paihang/	31.0425	119.609	Exact
CCM153	Cement	775	https://www.ccement.com/zhuanti/2016paihang/	31.0771	119.582	Exact
CCM154	Cement	1550	https://www.ccement.com/zhuanti/2016paihang/	31.0612	119.603	Exact
CCM155	Cement	1550	https://www.ccement.com/zhuanti/2016paihang/	31.0311	119.566	Exact
CCM156	Cement	1550	https://www.ccement.com/zhuanti/2016paihang/	31.834	118.095	Exact
CCM157	Cement	775	https://www.ccement.com/zhuanti/2016paihang/	31.1231	119.126	Approximate
CCM158	Cement	2325	https://www.ccement.com/zhuanti/2016paihang/	31.143	118.01	Exact
CCM159	Cement	775	https://www.ccement.com/zhuanti/2016paihang/	29.2727	119.296	Exact
CCM160	Cement	620	https://www.ccement.com/zhuanti/2016paihang/	29.1884	119.557	Exact
CCM161	Cement	1550	https://www.ccement.com/zhuanti/2016paihang/	29.2728	119.296	Exact
CCM162	Cement	1550	https://www.ccement.com/zhuanti/2016paihang/	30.6429	119.682	Approximate
CCM163	Cement	1550	https://www.ccement.com/zhuanti/2016paihang/	29.9944	119.897	Approximate
CCM164	Cement	1550	https://www.ccement.com/zhuanti/2016paihang/	29.8852	119.761	Exact
CCM165	Cement	775	https://www.ccement.com/zhuanti/2016paihang/	29.8257	119.695	Exact
CCM166	Cement	3100	https://www.ccement.com/zhuanti/2016paihang/	28.9641	118.466	Exact
CCM167	Cement	1550	https://www.ccement.com/zhuanti/2016paihang/	29.4257	119.25	Exact
CCM168	Cement	775	https://www.ccement.com/zhuanti/2016paihang/	30.6328	120.182	Exact
CCM169	Cement	775	https://www.ccement.com/zhuanti/2016paihang/	30.6515	120.371	Exact
CCM170	Cement	1550	https://www.ccement.com/zhuanti/2016paihang/	29.8177	119.697	Exact
CCM171	Cement	2325	https://www.ccement.com/zhuanti/2016paihang/	28.7033	118.59	Exact
CCM172	Cement	775	https://www.ccement.com/zhuanti/2016paihang/	31.1094	119.731	Exact
CCM173	Cement	775	https://www.ccement.com/zhuanti/2016paihang/	29.9797	120.553	Exact
CCM174	Cement	775	https://www.ccement.com/zhuanti/2016paihang/	29.1637	119.578	Exact
CCM175	Cement	3100	https://www.ccement.com/zhuanti/2016paihang/	30.9824	119.941	Exact
CCM176	Cement	775	https://www.ccement.com/zhuanti/2016paihang/	31.0678	119.826	Exact
CCM177	Cement	3100	https://www.ccement.com/zhuanti/2016paihang/	31.0865	119.688	Exact
CCM178	Cement	1550	https://www.ccement.com/zhuanti/2016paihang/	31.0971	119.756	Exact
CCM179	Cement	1550	https://www.ccement.com/zhuanti/2016paihang/	31.1601	119.694	Exact
CCM180	Cement	2170	https://www.ccement.com/zhuanti/2016paihang/	28.6848	118.556	Exact
CCM181	Cement	1550	https://www.ccement.com/zhuanti/2016paihang/	31.0315	119.91	Approximate
CCM182	Cement	1550	https://www.ccement.com/zhuanti/2016paihang/	25.7076	117.719	Exact
CCM183	Cement	2325	https://www.ccement.com/zhuanti/2016paihang/	30.7405	108.441	Exact
CCM184	Cement	992	https://www.ccement.com/zhuanti/2016paihang/	29.9899	108.117	Exact
CCM185	Cement	775	https://www.ccement.com/zhuanti/2016paihang/	28.3803	109.067	Exact
CCM186	Cement	1550	https://www.ccement.com/zhuanti/2016paihang/	28.9775	106.858	Exact
CCM187	Cement	1891	https://www.ccement.com/zhuanti/2016paihang/	29.8273	106.978	Exact
CCM188	Cement	2325	https://www.ccement.com/zhuanti/2016paihang/	29.8495	106.149	Exact
CCM189	Cement	775	https://www.ccement.com/zhuanti/2016paihang/	31.3121	104.525	Exact
CCM190	Cement	1550	https://www.ccement.com/zhuanti/2016paihang/	31.785	104.446	Exact
CCM191	Cement	2542	https://www.ccement.com/zhuanti/2016paihang/	31.2739	104.046	Exact
CCM192	Cement	1550	https://www.ccement.com/zhuanti/2016paihang/	30.3073	106.746	Exact
CCM193	Cement	620	https://www.ccement.com/zhuanti/2016paihang/	30.3888	106.784	Exact
CCM194	Cement	1550	https://www.ccement.com/zhuanti/2016paihang/	28.3123	102.195	Exact
CCM195	Cement	1550	https://www.ccement.com/zhuanti/2016paihang/	31.7869	104.654	Exact
CCM196	Cement	775	https://www.ccement.com/zhuanti/2016paihang/	30.7608	107.345	Exact
CCM197	Cement	775	https://www.ccement.com/zhuanti/2016paihang/	30.057	102.771	Exact
CCM198	Cement	1147	https://www.ccement.com/zhuanti/2016paihang/	30.0251	102.813	Exact
CCM199	Cement	2325	https://www.ccement.com/zhuanti/2016paihang/	29.6317	103.481	Approximate
CCM200	Cement	775	https://www.ccement.com/zhuanti/2016paihang/	29.0013	103.504	Approximate
CCM201	Cement	775	https://www.ccement.com/zhuanti/2016paihang/	31.0271	104.236	Exact
CCM202	Cement	1550	https://www.ccement.com/zhuanti/2016paihang/	29.3896	103.548	Exact
CCM203	Cement	775	https://www.ccement.com/zhuanti/2016paihang/	29.4235	102.611	Exact
CCM204	Cement	992	https://www.ccement.com/zhuanti/2016paihang/	29.8993	104.614	Exact
CCM205	Cement	775	https://www.ccement.com/zhuanti/2016paihang/	32.2582	106.068	Exact
CCM206	Cement	775	https://www.ccement.com/zhuanti/2016paihang/	29.9247	103.398	Exact
CCM207	Cement	775	https://www.ccement.com/zhuanti/2016paihang/	32.3148	105.462	Exact
CCM208	Cement	775	https://www.ccement.com/zhuanti/2016paihang/	30.9955	103.459	Exact
CCM209	Cement	775	https://www.ccement.com/zhuanti/2016paihang/	28.9227	105.203	Exact
CCM210	Cement	1550	https://www.ccement.com/zhuanti/2016paihang/	28.1077	104.55	Exact
CCM211	Cement	992	https://www.ccement.com/zhuanti/2016paihang/	29.737	104.786	Exact
CCM212	Cement	775	https://www.ccement.com/zhuanti/2016paihang/	30.0498	104.585	Exact
CCM213	Cement	1240	https://www.ccement.com/zhuanti/2016paihang/	30.072	102.74	Exact
CCM214	Cement	992	https://www.ccement.com/zhuanti/2016paihang/	29.5462	104.603	Exact
CCM215	Cement	1550	https://www.ccement.com/zhuanti/2016paihang/	31.7834	104.449	Exact
CCM216	Cement	775	https://www.ccement.com/zhuanti/2016paihang/	29.4023	103.312	Exact
CCM217	Cement	992	https://www.ccement.com/zhuanti/2016paihang/	32.4348	105.845	Approximate
CCM218	Cement	775	https://www.ccement.com/zhuanti/2016paihang/	31.382	104.509	Exact
CCM219	Cement	775	https://www.ccement.com/zhuanti/2016paihang/	28.0052	102.837	Exact
CCM220	Cement	1550	https://www.ccement.com/zhuanti/2016paihang/	31.4356	104.22	Exact
CCM221	Cement	775	https://www.ccement.com/zhuanti/2016paihang/	31.3122	104.525	Exact
CCM222	Cement	992	https://www.ccement.com/zhuanti/2016paihang/	28.3361	102.19	Exact
CCM223	Cement	992	https://www.ccement.com/zhuanti/2016paihang/	31.3594	107.991	Exact
CCM224	Cement	1860	https://www.ccement.com/zhuanti/2016paihang/	23.5991	104.336	Exact
CCM225	Cement	1550	https://www.ccement.com/zhuanti/2016paihang/	25.0086	103.219	Exact
CCM226	Cement	775	https://www.ccement.com/zhuanti/2016paihang/	24.7851	104.069	Exact
CCM227	Cement	775	https://www.ccement.com/zhuanti/2016paihang/	24.4331	98.5847	Approximate
CCM228	Cement	775	https://www.ccement.com/zhuanti/2016paihang/	22.7741	100.88	Exact
CCM229	Cement	3410	https://www.ccement.com/zhuanti/2016paihang/	27.1662	100.92	Exact
CCM230	Cement	1550	https://www.ccement.com/zhuanti/2016paihang/	24.6897	102.983	Exact
CCM231	Cement	775	https://www.ccement.com/zhuanti/2016paihang/	26.0061	104.252	Approximate
CCM232	Cement	1860	https://www.ccement.com/zhuanti/2016paihang/	25.0044	103.64	Approximate
CCM233	Cement	775	https://www.ccement.com/zhuanti/2016paihang/	26.632	101.427	Exact
CCM234	Cement	775	https://www.ccement.com/zhuanti/2016paihang/	25.2272	102.54	Exact
CCM235	Cement	1550	https://www.ccement.com/zhuanti/2016paihang/	22.7689	100.98	Approximate
CCM236	Cement	775	https://www.ccement.com/zhuanti/2016paihang/	26.2045	104.114	Exact
CCM237	Cement	1085	https://www.ccement.com/zhuanti/2016paihang/	26.1905	104.114	Exact
CCM238	Cement	372	https://www.ccement.com/zhuanti/2016paihang/	25.4336	103.583	Approximate
CCM239	Cement	775	https://www.ccement.com/zhuanti/2016paihang/	28.3114	106.263	Exact
CCM240	Cement	992	https://www.ccement.com/zhuanti/2016paihang/	27.2216	105.739	Exact
CCM241	Cement	775	https://www.ccement.com/zhuanti/2016paihang/	27.241	105.313	Exact
CCM242	Cement	992	https://www.ccement.com/zhuanti/2016paihang/	28.4954	108.486	Exact
CCM243	Cement	775	https://www.ccement.com/zhuanti/2016paihang/	27.2185	107.349	Exact
CCM244	Cement	992	https://www.ccement.com/zhuanti/2016paihang/	26.013	106.074	Approximate
CCM245	Cement	775	https://www.ccement.com/zhuanti/2016paihang/	25.8065	107.873	Exact
CCM246	Cement	775	https://www.ccement.com/zhuanti/2016paihang/	25.7898	107.467	Exact
CCM247	Cement	992	https://www.ccement.com/zhuanti/2016paihang/	25.0769	104.891	Exact
CCM248	Cement	992	https://www.ccement.com/zhuanti/2016paihang/	26.7775	104.397	Exact
CCM249	Cement	992	https://www.ccement.com/zhuanti/2016paihang/	24.9967	105.781	Exact
CCM250	Cement	775	https://www.ccement.com/zhuanti/2016paihang/	27.8898	108.262	Exact
CCM251	Cement	2325	https://www.ccement.com/zhuanti/2016paihang/	26.2814	106.683	Exact
CCM252	Cement	775	https://www.ccement.com/zhuanti/2016paihang/	27.9913	108.462	Exact
CCM253	Cement	775	https://www.ccement.com/zhuanti/2016paihang/	25.1773	106.1	Exact
CCM254	Cement	775	https://www.ccement.com/zhuanti/2016paihang/	26.627	106.365	Exact
CCM255	Cement	775	https://www.ccement.com/zhuanti/2016paihang/	27.994	108.944	Exact
CCM256	Cement	992	https://www.ccement.com/zhuanti/2016paihang/	26.6247	107.571	Exact
CCM257	Cement	775	https://www.ccement.com/zhuanti/2016paihang/	27.4676	109.129	Exact
CCM258	Cement	930	https://www.ccement.com/zhuanti/2016paihang/	26.8566	105.305	Exact
CCM259	Cement	775	https://www.ccement.com/zhuanti/2016paihang/	26.7026	105.825	Exact
CCM260	Cement	1550	https://www.ccement.com/zhuanti/2016paihang/	25.1488	104.918	Exact
CCM261	Cement	1240	https://www.ccement.com/zhuanti/2016paihang/	26.9385	106.687	Exact
CCM262	Cement	1395	https://www.ccement.com/zhuanti/2016paihang/	25.3911	105.651	Exact
CCM263	Cement	992	https://www.ccement.com/zhuanti/2016paihang/	26.936	106.099	Exact
CCM264	Cement	775	https://www.ccement.com/zhuanti/2016paihang/	27.4179	106.771	Approximate
CCM265	Cement	775	https://www.ccement.com/zhuanti/2016paihang/	27.6008	106.971	Exact
CCM266	Cement	2232	https://www.ccement.com/project/paihang2021/	45.5529	126.958	Approximate
CCM267	Cement	2325	https://www.ccement.com/zhuanti/2016paihang/	42.873	126.154	Exact
CCM268	Cement	1550	https://www.ccement.com/zhuanti/2016paihang/	43.5389	126.282	Exact
CCM269	Cement	1240	https://www.ccement.com/zhuanti/2016paihang/	41.1903	123.01	Exact
CCM270	Cement	775	https://www.ccement.com/zhuanti/2016paihang/	41.3124	123.339	Exact
CCM271	Cement	1550	https://www.ccement.com/zhuanti/2016paihang/	41.8791	110.118	Exact
CCM272	Cement	775	https://www.ccement.com/zhuanti/2016paihang/	40.4744	109.96	Approximate
CCM273	Cement	3100	https://www.ccement.com/zhuanti/2016paihang/	41.0347	111.47	Exact
CCM274	Cement	775	https://www.ccement.com/zhuanti/2016paihang/	40.9752	112.186	Approximate
CCM275	Cement	992	https://www.ccement.com/zhuanti/2016paihang/	44.1174	114.784	Approximate
CCM276	Cement	2232	https://www.ccement.com/zhuanti/2016paihang/	39.3919	115.699	Approximate
CCM277	Cement	1550	https://www.ccement.com/zhuanti/2016paihang/	38.864	114.841	Exact
CCM278	Cement	992	https://www.ccement.com/zhuanti/2016paihang/	37.6834	120.84	Exact
CCM279	Cement	992	https://www.ccement.com/zhuanti/2016paihang/	40.9914	118.706	Approximate
CCM280	Cement	775	https://www.ccement.com/zhuanti/2016paihang/	39.7283	119.165	Approximate
CCM281	Cement	1550	https://www.ccement.com/zhuanti/2016paihang/	38.3417	114.383	Approximate
CCM282	Cement	775	https://www.ccement.com/zhuanti/2016paihang/	38.8638	114.841	Exact
CCM283	Cement	3100	https://www.ccement.com/zhuanti/2016paihang/	39.9137	118.373	Exact
CCM284	Cement	1550	https://www.ccement.com/zhuanti/2016paihang/	39.7586	118.474	Exact
CCM285	Cement	7750	https://www.ccement.com/zhuanti/2016paihang/	39.8672	118.207	Exact
CCM286	Cement	2480	https://www.ccement.com/zhuanti/2016paihang/	39.7667	118.388	Exact
CCM287	Cement	3875	https://www.ccement.com/zhuanti/2016paihang/	37.4052	114.553	Exact
CCM288	Cement	2232	https://www.ccement.com/zhuanti/2016paihang/	37.3836	121.173	Exact
CCM289	Cement	3100	https://www.ccement.com/zhuanti/2016paihang/	39.9818	113.124	Exact
CCM290	Cement	930	https://www.ccement.com/zhuanti/2016paihang/	37.7892	112.567	Approximate
CCM291	Cement	1550	https://www.ccement.com/zhuanti/2016paihang/	37.8907	113.667	Exact
CCM292	Cement	1550	https://www.ccement.com/zhuanti/2016paihang/	35.4026	111.329	Exact
CCM293	Cement	3100	https://www.ccement.com/zhuanti/2016paihang/	34.6064	108.633	Exact
CCM294	Cement	1550	https://www.ccement.com/zhuanti/2016paihang/	34.5203	107.412	Approximate
CCM295	Cement	4340	https://www.ccement.com/zhuanti/2016paihang/	34.9074	108.992	Exact
CCM296	Cement	3100	https://www.ccement.com/zhuanti/2016paihang/	34.6063	108.633	Exact
CCM297	Cement	775	https://www.ccement.com/zhuanti/2016paihang/	37.4455	110.682	Exact
CCM298	Cement	1550	https://www.ccement.com/zhuanti/2016paihang/	29.9614	106.381	Exact
CCM299	Cement	1984	https://www.ccement.com/zhuanti/2016paihang/	29.2699	106.253	Approximate
CCM300	Cement	1550	https://www.ccement.com/zhuanti/2016paihang/	29.5916	106.244	Exact
CCM301	Cement	3255	https://www.ccement.com/zhuanti/2016paihang/	19.2359	109	Exact
CCM302	Cement	3100	https://www.ccement.com/zhuanti/2016paihang/	37.4604	110.952	Exact
CCM303	Cement	1550	https://www.ccement.com/zhuanti/2016paihang/	36.3479	113.508	Exact
CCM304	Cement	1550	https://www.ccement.com/zhuanti/2016paihang/	26.6468	100.208	Exact
CCM305	Cement	2325	https://www.ccement.com/zhuanti/2016paihang/	25.2899	100.55	Exact
CCM306	Cement	1550	https://www.ccement.com/zhuanti/2016paihang/	23.7252	106.831	Approximate
CCM307	Cement	3100	https://www.ccement.com/zhuanti/2016paihang/	22.1619	107.942	Exact
CCM308	Cement	3100	https://www.ccement.com/zhuanti/2016paihang/	22.935	109.565	Exact
CCM309	Cement	7750	https://www.ccement.com/zhuanti/2016paihang/	23.4916	110.501	Exact
CCM310	Cement	1550	https://www.ccement.com/zhuanti/2016paihang/	24.703	111.392	Exact
CCM311	Cement	1550	https://www.ccement.com/zhuanti/2016paihang/	23.5874	109.647	Approximate
CCM312	Cement	1767	https://www.ccement.com/zhuanti/2016paihang/	23.2054	109.168	Exact
CCM313	Cement	3100	https://www.ccement.com/zhuanti/2016paihang/	23.0301	108.088	Exact
CCM314	Cement	1550	https://www.ccement.com/zhuanti/2016paihang/	22.5802	110.244	Approximate
CCM315	Cement	2170	https://www.ccement.com/zhuanti/2016paihang/	23.2923	113.089	Exact
CCM316	Cement	930	https://www.ccement.com/zhuanti/2016paihang/	23.6391	114.375	Exact
CCM317	Cement	775	https://www.ccement.com/zhuanti/2016paihang/	22.3714	111.96	Exact
CCM318	Cement	1550	https://www.ccement.com/zhuanti/2016paihang/	22.5337	111.325	Exact
CCM319	Cement	2325	https://www.ccement.com/zhuanti/2016paihang/	21.5588	110.326	Exact
CCM320	Cement	9300	https://www.ccement.com/zhuanti/2016paihang/	23.2394	111.588	Exact
CCM321	Cement	1550	https://www.ccement.com/zhuanti/2016paihang/	27.4659	106.233	Approximate
CCM322	Cement	1550	https://www.ccement.com/zhuanti/2016paihang/	25.7742	113.075	Exact
CCM323	Cement	1550	https://www.ccement.com/zhuanti/2016paihang/	25.1156	117.06	Exact
CCM324	Cement	1550	https://www.ccement.com/zhuanti/2016paihang/	25.0553	117.06	Exact
CCM325	Cement	1550	https://www.ccement.com/zhuanti/2016paihang/	25.2399	117.16	Exact
CCM326	Cement	1550	https://www.ccement.com/zhuanti/2016paihang/	24.823	117.032	Approximate
CCM327	Cement	775	https://www.ccement.com/zhuanti/2016paihang/	25.2906	117.415	Approximate
CCM328	Cement	1550	https://www.ccement.com/zhuanti/2016paihang/	27.1773	108.81	Approximate
CCM329	Cement	3100	https://www.ccement.com/zhuanti/2016paihang/	26.5374	106.892	Exact
CCM330	Cement	1550	https://www.ccement.com/zhuanti/2016paihang/	41.722	83.0727	Approximate
CCM331	Cement	1550	https://www.ccement.com/zhuanti/2016paihang/	36.8715	103.196	Approximate
CCM332	Cement	3100	https://www.ccement.com/zhuanti/2016paihang/	30.1851	106.834	Exact
CCM333	Cement	1550	https://www.ccement.com/zhuanti/2016paihang/	31.7358	104.708	Exact
CCM334	Cement	1550	https://www.ccement.com/zhuanti/2016paihang/	28.4341	104.844	Exact
CCM335	Cement	3100	https://www.ccement.com/zhuanti/2016paihang/	24.9927	103.222	Exact
CCM336	Cement	1550	https://www.ccement.com/zhuanti/2016paihang/	22.4022	107.367	Approximate
CCM337	Cement	1550	https://www.ccement.com/zhuanti/2016paihang/	23.1735	108.291	Exact
CCM338	Cement	1550	https://www.ccement.com/zhuanti/2016paihang/	27.1176	113.115	Exact
CCM339	Cement	1550	https://www.ccement.com/zhuanti/2016paihang/	25.8843	115.7	Exact
CCM340	Cement	3100	https://www.ccement.com/zhuanti/2016paihang/	28.1465	115.515	Exact
CCM341	Cement	3100	https://www.ccement.com/zhuanti/2016paihang/	29.4191	119.16	Exact
CCM342	Cement	1550	https://www.ccement.com/zhuanti/2016paihang/	29.8365	119.708	Exact
CCM343	Cement	3100	https://www.ccement.com/zhuanti/2016paihang/	29.1549	119.538	Exact
CCM344	Cement	1240	https://www.ccement.com/zhuanti/2016paihang/	29.1873	119.171	Exact
CCM345	Cement	4650	https://www.ccement.com/zhuanti/2016paihang/	25.3491	117.378	Exact
CCM346	Cement	1550	https://www.ccement.com/zhuanti/2016paihang/	25.7777	117.722	Exact
CCM347	Cement	620	https://www.ccement.com/zhuanti/2016paihang/	29.2363	88.893	Exact
CCM348	Cement	930	https://www.ccement.com/zhuanti/2016paihang/	29.2627	91.8285	Approximate
CCM349	Cement	1860	https://www.ccement.com/zhuanti/2016paihang/	30.7655	107.059	Exact
CCM350	Cement	775	https://www.ccement.com/zhuanti/2016paihang/	32.136	108.08	Approximate
CCM351	Cement	1240	https://www.huaxincem.com/list/138.html	25.0994	102.903	Exact
CCM352	Cement	1200	https://www.huaxincem.com/list/138.html	23.9485	99.7639	Approximate
CCM353	Cement	1240	https://www.huaxincem.com/list/138.html	25.4953	102.513	Approximate
CCM354	Cement	1240	https://www.huaxincem.com/list/138.html	23.6934	103.247	Exact
CCM355	Cement	775	https://www.huaxincem.com/list/138.html	26.5839	99.9316	Exact
CCM356	Cement	1100	https://www.huaxincem.com/list/138.html	26.613	101.459	Exact
CCM357	Cement	775	https://www.huaxincem.com/list/138.html	25.6518	99.1183	Exact
CCM358	Cement	1800	https://www.huaxincem.com/list/138.html	24.9178	99.0994	Exact
CCM359	Cement	620	https://www.ccement.com/zhuanti/2016paihang/	27.5378	99.5603	Exact
CCM360	Cement	775	https://www.ccement.com/zhuanti/2016paihang/	26.1274	103.169	Exact
CCM361	Cement	775	https://www.ccement.com/zhuanti/2016paihang/	22.0141	100.815	Approximate
CCM362	Cement	1240	https://www.ccement.com/zhuanti/2016paihang/	27.439	103.795	Exact
CCM363	Cement	620	https://www.ccement.com/zhuanti/2016paihang/	30.2666	109.44	Exact
CCM364	Cement	465	https://www.ccement.com/zhuanti/2016paihang/	29.8236	109.914	Exact
CCM365	Cement	3720	https://www.ccement.com/zhuanti/2016paihang/	29.8943	115.442	Exact
CCM366	Cement	2325	https://www.ccement.com/zhuanti/2016paihang/	30.204	114.866	Exact
CCM367	Cement	3720	https://www.ccement.com/zhuanti/2016paihang/	30.1146	115.284	Exact
CCM368	Cement	2480	https://www.ccement.com/zhuanti/2016paihang/	30.1936	115.063	Exact
CCM369	Cement	2015	https://www.ccement.com/zhuanti/2016paihang/	32.6659	110.795	Exact
CCM370	Cement	775	https://www.ccement.com/zhuanti/2016paihang/	32.0618	110.551	Approximate
CCM371	Cement	1240	https://www.ccement.com/zhuanti/2016paihang/	29.7432	113.997	Exact
CCM372	Cement	2480	https://www.ccement.com/zhuanti/2016paihang/	31.7525	111.825	Exact
CCM373	Cement	1860	https://www.ccement.com/zhuanti/2016paihang/	30.3125	111.499	Exact
CCM374	Cement	1550	https://www.ccement.com/zhuanti/2016paihang/	30.5172	111.237	Exact
CCM375	Cement	1550	https://www.ccement.com/zhuanti/2016paihang/	30.9164	110.714	Exact
CCM376	Cement	1550	https://www.ccement.com/zhuanti/2016paihang/	29.5914	107.438	Exact
CCM377	Cement	1550	https://www.ccement.com/zhuanti/2016paihang/	25.7173	112.895	Exact
CCM378	Cement	1860	https://www.ccement.com/zhuanti/2016paihang/	27.6977	111.442	Exact
CCM379	Cement	1240	https://www.ccement.com/zhuanti/2016paihang/	25.6054	111.43	Exact
CCM380	Cement	775	https://www.ccement.com/zhuanti/2016paihang/	29.4164	110.265	Exact
CCM381	Cement	1860	https://www.ccement.com/zhuanti/2016paihang/	27.8671	113.184	Approximate
CCM382	Cement	1550	https://www.ccement.com/zhuanti/2016paihang/	30.3977	106.817	Exact
CCM383	Cement	1550	https://www.ccement.com/zhuanti/2016paihang/	30.4667	106.904	Exact
CCM384	Cement	1550	https://www.ccement.com/zhuanti/2016paihang/	28.8059	105.87	Exact
CCM385	Cement	3100	https://www.ccement.com/zhuanti/2016paihang/	29.8632	106.207	Exact
CCM386	Cement	2480	https://www.ccement.com/zhuanti/2016paihang/	24.9213	99.0775	Exact
CCM387	Cement	1860	https://www.ccement.com/zhuanti/2016paihang/	24.927	102.428	Exact
CCM388	Cement	7440	https://www.ccement.com/zhuanti/2016paihang/	23.1348	109.359	Exact
CCM389	Cement	7440	https://www.ccement.com/zhuanti/2016paihang/	24.2453	113.415	Exact
CCM390	Cement	4650	https://www.ccement.com/zhuanti/2016paihang/	24.2727	113.431	Exact
CCM391	Cement	930	https://www.ccement.com/zhuanti/2016paihang/	25.9375	105.546	Exact
CCM392	Cement	3100	https://www.ccement.com/zhuanti/2016paihang/	26.408	106.261	Approximate
CCM393	Cement	1643	https://www.ccement.com/zhuanti/2016paihang/	26.5862	107.961	Exact
CCM394	Cement	930	https://www.ccement.com/zhuanti/2016paihang/	26.5387	109.581	Approximate
CCM395	Cement	1767	https://www.ccement.com/zhuanti/2016paihang/	27.5955	110.099	Exact
CCM396	Cement	3937	https://www.ccement.com/zhuanti/2016paihang/	32.1719	119.239	Approximate
CCM397	Cement	1240	https://www.ccement.com/zhuanti/2016paihang/	41.9559	126.568	Exact
CCM398	Cement	2697	https://www.ccement.com/zhuanti/2016paihang/	41.27	123.717	Exact
CCM399	Cement	2015	https://www.ccement.com/zhuanti/2016paihang/	41.4518	120.045	Exact
CCM400	Cement	1240	https://www.ccement.com/zhuanti/2016paihang/	41.4206	119.817	Approximate
CCM401	Cement	1550	https://www.ccement.com/zhuanti/2016paihang/	38.8488	121.254	Exact
CCM402	Cement	1240	https://www.ccement.com/zhuanti/2016paihang/	40.7662	120.848	Exact
CCM403	Cement	1860	https://www.ccement.com/zhuanti/2016paihang/	41.2317	123.349	Exact
CCM404	Cement	775	https://www.ccement.com/zhuanti/2016paihang/	36.5597	116.861	Exact
CCM405	Cement	3100	https://www.ccement.com/zhuanti/2016paihang/	36.2772	116.575	Exact
CCM406	Cement	1550	https://www.ccement.com/zhuanti/2016paihang/	36.5869	116.924	Exact
CCM407	Cement	775	https://www.ccement.com/zhuanti/2016paihang/	35.3592	116.38	Exact
CCM408	Cement	1550	https://www.ccement.com/zhuanti/2016paihang/	35.1315	116.739	Exact
CCM409	Cement	775	https://www.ccement.com/zhuanti/2016paihang/	36.3087	116.345	Exact
CCM410	Cement	1550	https://www.ccement.com/zhuanti/2016paihang/	35.7184	118.572	Exact
CCM411	Cement	3100	https://www.ccement.com/zhuanti/2016paihang/	36.1215	119.032	Exact
CCM412	Cement	775	https://www.ccement.com/zhuanti/2016paihang/	36.7025	118.902	Exact
CCM413	Cement	2790	https://www.ccement.com/zhuanti/2016paihang/	36.4305	118.402	Exact
CCM414	Cement	775	https://www.ccement.com/zhuanti/2016paihang/	36.6733	118.99	Exact
CCM415	Cement	1085	https://www.ccement.com/zhuanti/2016paihang/	37.6834	120.84	Exact
CCM416	Cement	992	https://www.ccement.com/zhuanti/2016paihang/	37.4784	121.061	Approximate
CCM417	Cement	2480	https://www.ccement.com/zhuanti/2016paihang/	37.4767	121.056	Exact
CCM418	Cement	1240	https://www.ccement.com/zhuanti/2016paihang/	34.549	117.557	Approximate
CCM419	Cement	2790	https://www.ccement.com/zhuanti/2016paihang/	34.5295	117.625	Exact
CCM420	Cement	1550	https://www.ccement.com/zhuanti/2016paihang/	36.8223	118.091	Exact
CCM421	Cement	3100	https://www.ccement.com/zhuanti/2016paihang/	36.6404	117.756	Exact
CCM422	Cement	1550	https://www.ccement.com/zhuanti/2016paihang/	35.8382	112.964	Exact
CCM423	Cement	992	https://www.ccement.com/zhuanti/2016paihang/	35.369	112.437	Exact
CCM424	Cement	1240	https://www.ccement.com/zhuanti/2016paihang/	37.6111	111.031	Approximate
CCM425	Cement	1550	https://www.ccement.com/zhuanti/2016paihang/	37.6977	111.005	Approximate
CCM426	Cement	775	https://www.ccement.com/zhuanti/2016paihang/	38.1807	112.707	Exact
CCM427	Cement	775	https://www.ccement.com/zhuanti/2016paihang/	39.0409	111.351	Approximate
CCM428	Cement	1550	https://www.ccement.com/zhuanti/2016paihang/	36.3216	113.176	Exact
CCM429	Cement	1550	https://www.ccement.com/zhuanti/2016paihang/	38.6622	76.1959	Approximate
CCM430	Cement	1767	https://www.ccement.com/zhuanti/2016paihang/	43.921	120.119	Exact
CCM431	Cement	1550	https://www.ccement.com/zhuanti/2016paihang/	42.2868	118.983	Exact
CCM432	Cement	2015	https://www.ccement.com/zhuanti/2016paihang/	46.7542	122.682	Exact
CCM433	Cement	1550	https://www.ccement.com/zhuanti/2016paihang/	34.14	117.029	Exact
CCM434	Cement	1240	https://www.ccement.com/zhuanti/2016paihang/	40.8279	122.693	Exact
CCM435	Cement	4650	https://www.ccement.com/zhuanti/2016paihang/	39.5863	121.442	Exact
CCM436	Cement	992	https://www.ccement.com/zhuanti/2016paihang/	41.3144	123.278	Exact
CCM437	Cement	1550	https://www.ccement.com/zhuanti/2016paihang/	41.2242	123.334	Exact
CCM438	Cement	3100	https://www.ccement.com/zhuanti/2016paihang/	41.281	123.289	Exact
CCM439	Cement	1550	https://www.ccement.com/zhuanti/2016paihang/	33.4091	112.322	Exact
CCM440	Cement	3100	https://www.ccement.com/zhuanti/2016paihang/	33.8786	112.907	Exact
CCM441	Cement	2325	https://www.ccement.com/zhuanti/2016paihang/	34.1172	112.829	Exact
CCM442	Cement	1240	https://www.ccement.com/zhuanti/2016paihang/	34.2616	112.612	Exact
CCM443	Cement	3100	https://www.ccement.com/zhuanti/2016paihang/	34.3582	114.731	Exact
CCM444	Cement	1550	https://www.ccement.com/zhuanti/2016paihang/	31.9484	114.634	Exact
CCM445	Cement	3100	https://www.ccement.com/zhuanti/2016paihang/	34.1418	113.431	Exact
CCM446	Cement	1550	https://www.ccement.com/zhuanti/2016paihang/	34.3891	113.244	Exact
CCM447	Cement	1550	https://www.ccement.com/zhuanti/2016paihang/	34.5737	112.52	Exact
CCM448	Cement	3720	https://www.ccement.com/zhuanti/2016paihang/	34.6552	113.374	Exact
CCM449	Cement	775	https://www.ccement.com/zhuanti/2016paihang/	43.1774	124.391	Exact
CCM450	Cement	930	https://www.ccement.com/zhuanti/2016paihang/	39.3282	115.452	Exact
CCM451	Cement	1240	https://www.ccement.com/zhuanti/2016paihang/	38.6119	114.685	Exact
CCM452	Cement	1240	https://www.ccement.com/zhuanti/2016paihang/	40.5255	117.612	Exact
CCM453	Cement	2945	https://www.ccement.com/zhuanti/2016paihang/	36.6157	114.434	Exact
CCM454	Cement	1550	https://www.ccement.com/zhuanti/2016paihang/	36.5992	113.723	Exact
CCM455	Cement	4650	https://www.ccement.com/zhuanti/2016paihang/	38.0736	114.41	Exact
CCM456	Cement	1550	https://www.ccement.com/zhuanti/2016paihang/	38.1961	114.311	Exact
CCM457	Cement	2945	https://www.ccement.com/zhuanti/2016paihang/	37.5981	114.466	Exact
CCM458	Cement	1550	https://www.ccement.com/zhuanti/2016paihang/	37.0964	114.546	Exact
CCM459	Cement	775	https://www.ccement.com/zhuanti/2016paihang/	40.591	115.083	Exact
CCM460	Cement	341	https://www.ccement.com/zhuanti/2016paihang/	40.5925	115.089	Exact
CCM461	Cement	1240	https://www.ccement.com/zhuanti/2016paihang/	40.1474	115.272	Exact
CCM462	Cement	775	https://www.ccement.com/zhuanti/2016paihang/	35.2146	113.089	Approximate
CCM463	Cement	775	https://www.ccement.com/zhuanti/2016paihang/	35.1819	112.805	Approximate
CCM464	Cement	1240	https://www.ccement.com/zhuanti/2016paihang/	39.7911	114.342	Approximate
CCM465	Cement	992	https://www.ccement.com/zhuanti/2016paihang/	35.8442	113.347	Exact
CCM466	Cement	775	https://www.ccement.com/zhuanti/2016paihang/	37.0684	113.377	Exact
CCM467	Cement	775	https://www.ccement.com/zhuanti/2016paihang/	38.2484	111.589	Exact
CCM468	Cement	1395	https://www.ccement.com/zhuanti/2016paihang/	39.6011	116.042	Exact
CCM469	Cement	1612	https://www.ccement.com/zhuanti/2016paihang/	40.178	116.215	Exact
CCM470	Cement	930	https://www.ccement.com/zhuanti/2016paihang/	39.7727	116.03	Approximate
CCM471	Cement	1550	https://www.ccement.com/zhuanti/2016paihang/	31.5276	119.27	Approximate
CCM472	Cement	1550	https://www.ccement.com/zhuanti/2016paihang/	31.4799	119.149	Exact
CCM473	Cement	2325	https://www.ccement.com/zhuanti/2016paihang/	31.2971	119.864	Approximate
CCM474	Cement	620	https://www.ccement.com/zhuanti/2016paihang/	39.5238	76.0486	Exact
CCM475	Cement	1457	https://www.ccement.com/zhuanti/2016paihang/	41.1484	80.2753	Exact
CCM476	Cement	2015	https://www.ccement.com/zhuanti/2016paihang/	41.7182	82.9619	Approximate
CCM477	Cement	930	https://www.ccement.com/zhuanti/2016paihang/	46.9869	89.5429	Exact
CCM478	Cement	620	https://www.ccement.com/zhuanti/2016paihang/	47.7085	86.8834	Exact
CCM479	Cement	930	https://www.ccement.com/zhuanti/2016paihang/	39.0265	88.1672	Exact
CCM480	Cement	310	https://www.ccement.com/zhuanti/2016paihang/	42.3928	86.3137	Exact
CCM481	Cement	310	https://www.ccement.com/zhuanti/2016paihang/	41.8184	86.0273	Exact
CCM482	Cement	775	https://www.ccement.com/zhuanti/2016paihang/	41.8399	86.2983	Exact
CCM483	Cement	1240	https://www.ccement.com/zhuanti/2016paihang/	44.0027	87.3312	Exact
CCM484	Cement	1550	https://www.ccement.com/zhuanti/2016paihang/	44.1652	87.9863	Exact
CCM485	Cement	2325	https://www.ccement.com/zhuanti/2016paihang/	42.7108	93.4381	Exact
CCM486	Cement	992	https://www.ccement.com/zhuanti/2016paihang/	36.9978	80.1938	Exact
CCM487	Cement	1240	https://www.ccement.com/zhuanti/2016paihang/	39.524	76.0485	Exact
CCM488	Cement	1240	https://www.ccement.com/zhuanti/2016paihang/	37.1526	77.0592	Exact
CCM489	Cement	1550	https://www.ccement.com/zhuanti/2016paihang/	39.6499	75.9011	Exact
CCM490	Cement	1705	https://www.ccement.com/zhuanti/2016paihang/	43.1576	88.8381	Exact
CCM491	Cement	1736	https://www.ccement.com/zhuanti/2016paihang/	43.9338	87.6713	Exact
CCM492	Cement	2387	https://www.ccement.com/zhuanti/2016paihang/	43.6631	88.0079	Approximate
CCM493	Cement	310	https://www.ccement.com/zhuanti/2016paihang/	44.2912	85.6365	Exact
CCM494	Cement	1550	https://www.ccement.com/zhuanti/2016paihang/	43.678	81.1693	Exact
CCM495	Cement	3100	https://www.ccement.com/zhuanti/2016paihang/	31.0349	103.787	Approximate
CCM496	Cement	3906	https://www.ccement.com/zhuanti/2016paihang/	30.9807	103.92	Exact
CCM497	Cement	1302	https://www.ccement.com/zhuanti/2016paihang/	29.913	115.427	Exact
CCM498	Cement	3100	https://www.ccement.com/zhuanti/2016paihang/	30.6748	114.552	Exact
CCM499	Cement	930	https://www.ccement.com/zhuanti/2016paihang/	30.2748	114.333	Exact
CCM500	Cement	8928	https://www.ccement.com/zhuanti/2016paihang/	29.8128	115.589	Exact
CCM501	Cement	3100	https://www.ccement.com/zhuanti/2016paihang/	45.7374	127.177	Exact
CCM502	Cement	775	https://www.ccement.com/zhuanti/2016paihang/	50.0873	125.654	Exact
CCM503	Cement	620	https://www.ccement.com/zhuanti/2016paihang/	45.3619	131.023	Exact
CCM504	Cement	2635	https://www.ccement.com/zhuanti/2016paihang/	46.2322	130.597	Exact
CCM505	Cement	1240	https://www.ccement.com/zhuanti/2016paihang/	44.565	129.609	Exact
CCM506	Cement	775	https://www.ccement.com/zhuanti/2016paihang/	47.3365	123.138	Exact
CCM507	Cement	775	https://www.ccement.com/zhuanti/2016paihang/	47.3215	123.969	Approximate
CCM508	Cement	775	https://www.ccement.com/zhuanti/2016paihang/	47.1383	123.81	Approximate
CCM509	Cement	1860	https://www.ccement.com/zhuanti/2016paihang/	47.7301	128.919	Exact
CCM510	Cement	1240	https://www.ccement.com/zhuanti/2016paihang/	41.2989	119.423	Exact
CCM511	Cement	1240	https://www.ccement.com/zhuanti/2016paihang/	39.4655	121.752	Exact
CCM512	Cement	1240	https://www.ccement.com/zhuanti/2016paihang/	41.9317	126.456	Exact
CCM513	Cement	3100	https://www.ccement.com/zhuanti/2016paihang/	42.9398	125.109	Exact
CCM514	Cement	775	https://www.ccement.com/zhuanti/2016paihang/	43.2104	124.396	Exact
CCM515	Cement	1240	https://www.ccement.com/zhuanti/2016paihang/	43.5081	129.668	Exact
CCM516	Cement	775	https://www.ccement.com/zhuanti/2016paihang/	47.9952	122.764	Exact
CCM517	Cement	1550	https://www.ccement.com/zhuanti/2016paihang/	36.591	104.128	Exact
CCM518	Cement	2480	https://www.ccement.com/zhuanti/2016paihang/	34.845	104.425	Exact
CCM519	Cement	1085	https://www.ccement.com/zhuanti/2016paihang/	35.3223	102.786	Exact
CCM520	Cement	2542	https://www.ccement.com/zhuanti/2016paihang/	39.8201	98.2424	Exact
CCM521	Cement	1240	https://www.ccement.com/zhuanti/2016paihang/	36.4393	102.876	Exact
CCM522	Cement	3100	https://www.ccement.com/zhuanti/2016paihang/	36.826	103.214	Exact
CCM523	Cement	2480	https://www.ccement.com/zhuanti/2016paihang/	33.7213	105.67	Exact
CCM524	Cement	775	https://www.ccement.com/zhuanti/2016paihang/	33.4066	104.897	Exact
CCM525	Cement	775	https://www.ccement.com/zhuanti/2016paihang/	32.9436	104.684	Approximate
CCM526	Cement	775	https://www.ccement.com/zhuanti/2016paihang/	35.4802	106.841	Exact
CCM527	Cement	1240	https://www.ccement.com/zhuanti/2016paihang/	34.737	105.225	Exact
CCM528	Cement	775	https://www.ccement.com/zhuanti/2016paihang/	34.8068	104.771	Approximate
CCM529	Cement	1860	https://www.ccement.com/zhuanti/2016paihang/	37.4022	102.912	Exact
CCM530	Cement	775	https://www.ccement.com/zhuanti/2016paihang/	38.9217	100.458	Approximate
CCM531	Cement	775	https://www.ccement.com/zhuanti/2016paihang/	36.3406	102.812	Exact
CCM532	Cement	2325	https://www.ccement.com/zhuanti/2016paihang/	36.4394	101.602	Exact
CCM533	Cement	2480	https://www.ccement.com/zhuanti/2016paihang/	29.3546	91.1364	Approximate
CCM534	Cement	992	https://www.ccement.com/zhuanti/2016paihang/	26.4034	106.635	Exact
CCM535	Cement	1240	https://www.ccement.com/zhuanti/2016paihang/	32.8336	109.299	Exact
CCM536	Cement	775	https://www.ccement.com/zhuanti/2016paihang/	32.8336	109.295	Exact
CCM537	Cement	930	https://www.ccement.com/zhuanti/2016paihang/	33.1359	106.851	Exact
CCM538	Cement	930	https://www.ccement.com/zhuanti/2016paihang/	32.9855	107.786	Exact
CCM539	Cement	930	https://www.ccement.com/zhuanti/2016paihang/	33.1931	107.463	Exact
CCM540	Cement	1612	https://www.ccement.com/zhuanti/2016paihang/	33.8894	110.261	Exact
CCM541	Cement	465	https://www.ccement.com/zhuanti/2016paihang/	33.3997	109.198	Exact
CCM542	Cement	1550	https://www.ccement.com/zhuanti/2016paihang/	34.9217	108.955	Exact
CCM543	Cement	1085	https://www.ccement.com/zhuanti/2016paihang/	35.6046	110.544	Exact
CCM544	Cement	1550	https://www.ccement.com/zhuanti/2016paihang/	34.8168	109.05	Exact
CCM545	Cement	1550	https://www.ccement.com/zhuanti/2016paihang/	34.9064	109.214	Approximate
CCM546	Cement	1550	https://www.ccement.com/zhuanti/2016paihang/	35.1021	109.595	Exact
CCM547	Cement	1550	https://www.ccement.com/zhuanti/2016paihang/	34.05	109.267	Exact
CCM548	Cement	1395	https://www.ccement.com/zhuanti/2016paihang/	36.7904	81.8501	Exact
CCM549	Cement	465	https://www.ccement.com/zhuanti/2016paihang/	37.2274	79.7968	Approximate
CCM550	Cement	992	https://www.ccement.com/zhuanti/2016paihang/	44.3173	80.9384	Approximate
CCM551	Cement	1085	https://www.ccement.com/zhuanti/2016paihang/	45.831	126.728	Exact
CCM552	Cement	1550	https://www.ccement.com/zhuanti/2016paihang/	45.4055	127.435	Approximate
CCM553	Cement	3100	https://www.ccement.com/zhuanti/2016paihang/	43.17	126.042	Exact
CCM554	Cement	775	https://www.ccement.com/zhuanti/2016paihang/	43.347	125.336	Exact
CCM555	Cement	775	https://www.ccement.com/zhuanti/2016paihang/	41.8084	126.257	Exact
CCM556	Cement	5890	https://www.ccement.com/zhuanti/2016paihang/	43.4206	125.922	Approximate
CCM557	Cement	1550	https://www.ccement.com/zhuanti/2016paihang/	41.3534	123.75	Exact
CCM558	Cement	1550	https://www.ccement.com/zhuanti/2016paihang/	41.3463	123.501	Approximate
CCM559	Cement	3100	https://www.ccement.com/zhuanti/2016paihang/	42.1269	123.601	Approximate
CCM560	Cement	4650	https://www.ccement.com/zhuanti/2016paihang/	31.5277	117.745	Exact
CCM561	Cement	3100	https://www.ccement.com/zhuanti/2016paihang/	23.0314	111.984	Exact
CCM562	Cement	775	https://www.ccement.com/zhuanti/2016paihang/	23.1286	111.773	Exact
CCM563	Cement	1550	https://www.ccement.com/zhuanti/2016paihang/	23.0535	111.999	Exact
CCM564	Cement	1550	https://www.ccement.com/zhuanti/2016paihang/	22.7397	111.74	Exact
CCM565	Cement	775	https://www.ccement.com/zhuanti/2016paihang/	29.306	111.321	Exact
CCM566	Cement	1550	https://www.ccement.com/zhuanti/2016paihang/	27.9798	112.85	Approximate
CCM567	Cement	1550	https://www.ccement.com/zhuanti/2016paihang/	27.9617	113.224	Exact
CCM568	Cement	2325	https://www.ccement.com/zhuanti/2016paihang/	27.6226	113.615	Exact
CCM569	Cement	775	https://www.ccement.com/zhuanti/2016paihang/	29.6206	111.313	Exact
CCM570	Cement	1550	https://www.ccement.com/zhuanti/2016paihang/	31.1459	112.195	Exact
CCM571	Cement	3410	https://www.ccement.com/zhuanti/2016paihang/	31.2779	112.283	Exact
CCM572	Cement	2170	https://www.ccement.com/zhuanti/2016paihang/	30.0633	111.487	Exact
CCM573	Cement	1550	https://www.ccement.com/zhuanti/2016paihang/	29.866	113.805	Exact
CCM574	Cement	1550	https://www.ccement.com/zhuanti/2016paihang/	32.0758	112.124	Exact
CCM575	Cement	1550	https://www.ccement.com/zhuanti/2016paihang/	31.7412	112.508	Exact
CCM576	Cement	2635	https://www.ccement.com/zhuanti/2016paihang/	30.864	111.647	Exact
CCM577	Cement	775	https://www.ccement.com/zhuanti/2016paihang/	31.1761	110.755	Exact
CCM578	Cement	1550	https://www.ccement.com/zhuanti/2016paihang/	34.6187	105.406	Exact
CCM579	Cement	1550	https://www.ccement.com/zhuanti/2016paihang/	42.0158	118.976	Exact
CCM580	Cement	775	https://www.ccement.com/zhuanti/2016paihang/	38.9682	106.319	Exact
CCM581	Cement	2325	https://www.ccement.com/zhuanti/2016paihang/	39.4381	106.817	Exact
CCM582	Cement	310	https://www.ccement.com/zhuanti/2016paihang/	35.6713	106.391	Exact
CCM583	Cement	3100	https://www.ccement.com/zhuanti/2016paihang/	37.8815	105.951	Exact
CCM584	Cement	3875	https://www.ccement.com/zhuanti/2016paihang/	38.5337	106.096	Exact
CCM585	Cement	837	https://www.ccement.com/zhuanti/2016paihang/	37.4238	105.661	Exact
CCM586	Cement	775	https://www.ccement.com/zhuanti/2016paihang/	25.8446	115.025	Exact
CCM587	Cement	3100	https://www.ccement.com/zhuanti/2016paihang/	25.8379	115.889	Exact
CCM588	Cement	1705	https://www.ccement.com/zhuanti/2016paihang/	25.8136	115.472	Exact
CCM589	Cement	1627.5	https://www.ccement.com/zhuanti/2016paihang/	29.1218	117.334	Exact
CCM590	Cement	4030	https://www.ccement.com/zhuanti/2016paihang/	28.696	117.081	Exact
CCM591	Cement	1550	https://www.ccement.com/zhuanti/2016paihang/	28.6953	118.313	Exact
CCM592	Cement	2542	https://www.ccement.com/zhuanti/2016paihang/	37.1623	106.773	Exact
CCM593	Cement	1550	https://www.ccement.com/zhuanti/2016paihang/	44.8641	82.0831	Exact
CCM594	Cement	3100	https://www.ccement.com/zhuanti/2016paihang/	30.5973	116.768	Exact
CCM595	Cement	4650	https://www.ccement.com/zhuanti/2016paihang/	30.8164	117.804	Exact
CCM596	Cement	1240	https://www.ccement.com/zhuanti/2016paihang/	29.8768	120.154	Exact
CCM597	Cement	775	https://www.ccement.com/zhuanti/2016paihang/	29.9621	120.291	Exact
CCM598	Cement	2325	http://www.tapai.com/intro-1-1.html	24.6586	116.178	Exact
CCM599	Cement	620	http://www.tapai.com/intro-1-1.html	24.5524	116.51	Approximate
CCM600	Cement	2790	http://www.tapai.com/intro-1-1.html	23.5845	113.967	Approximate
CCM601	Cement	6200	http://www.tapai.com/intro-1-1.html	24.2899	116.122	Approximate
CCM602	Cement	2790	http://www.tapai.com/intro-1-1.html	25.0474	117.022	Approximate
CCM603	Cement	2015	https://www.ccement.com/zhuanti/2016paihang/	41.7723	82.9169	Exact
CCM604	Cement	4030	https://www.ccement.com/zhuanti/2016paihang/	41.064	80.1903	Exact
CCM605	Cement	775	https://www.ccement.com/zhuanti/2016paihang/	41.7727	86.1447	Approximate
CCM606	Cement	775	https://www.ccement.com/zhuanti/2016paihang/	42.7172	93.5698	Exact
CCM607	Cement	620	https://www.ccement.com/zhuanti/2016paihang/	37.2083	79.2976	Approximate
CCM608	Cement	2635	https://www.ccement.com/zhuanti/2016paihang/	39.7177	76.1683	Approximate
CCM609	Cement	310	https://www.ccement.com/zhuanti/2016paihang/	46.5703	85.9749	Approximate
CCM610	Cement	992	https://www.ccement.com/zhuanti/2016paihang/	43.1787	81.1359	Exact
CCM611	Cement	930	https://www.ccement.com/zhuanti/2016paihang/	44.4466	84.7647	Exact
CCM612	Cement	496	https://www.ccement.com/zhuanti/2016paihang/	44.1984	80.7422	Exact
CCM613	Cement	775	https://www.ccement.com/zhuanti/2016paihang/	43.9522	81.477	Exact
CCM614	Cement	5425	https://www.ccement.com/zhuanti/2016paihang/	31.3816	119.318	Exact
CCM615	Cement	4650	https://www.ccement.com/zhuanti/2016paihang/	31.5976	119.364	Approximate
CCM616	Cement	3100	https://www.ccement.com/zhuanti/2016paihang/	31.3416	119.331	Exact
CCM617	Cement	894.231	total capacity averaged to 13 sites http://cache.baiducontent.com/c?m=8rzlwk9PrFuty_24smkuA8x8iXF6PewMtF2PFBfyer5DFtJ8pGHPPjGIXAdeK6Tf4Rs_h2RXroB-jPo81X8_dvjwq0ZFQQPM1EVtZXjyRWq5MGK27rj8FOLKPvDO69Ex_TF0HdNhpaTUK5w-eDiEfRAykAezVxti8rzH36dgJVm-FgLs62Lo-PyxyulAyhPaGEtNCA5R-Tw78Idg0RBKsK&p=882a9645d7980af407b7c7710f4894&newp=9c678b16d9c107ff57ee947f5205a5231610db2151d4d7146b82c825d7331b001c3bbfb42220…	23.6097	102.87	Exact
CCM618	Cement	894.231	total capacity averaged to 13 sites http://cache.baiducontent.com/c?m=8rzlwk9PrFuty_24smkuA8x8iXF6PewMtF2PFBfyer5DFtJ8pGHPPjGIXAdeK6Tf4Rs_h2RXroB-jPo81X8_dvjwq0ZFQQPM1EVtZXjyRWq5MGK27rj8FOLKPvDO69Ex_TF0HdNhpaTUK5w-eDiEfRAykAezVxti8rzH36dgJVm-FgLs62Lo-PyxyulAyhPaGEtNCA5R-Tw78Idg0RBKsK&p=882a9645d7980af407b7c7710f4894&newp=9c678b16d9c107ff57ee947f5205a5231610db2151d4d7146b82c825d7331b001c3bbfb42220…	23.7643	98.847	Exact
CCM619	Cement	894.231	total capacity averaged to 13 sites http://cache.baiducontent.com/c?m=8rzlwk9PrFuty_24smkuA8x8iXF6PewMtF2PFBfyer5DFtJ8pGHPPjGIXAdeK6Tf4Rs_h2RXroB-jPo81X8_dvjwq0ZFQQPM1EVtZXjyRWq5MGK27rj8FOLKPvDO69Ex_TF0HdNhpaTUK5w-eDiEfRAykAezVxti8rzH36dgJVm-FgLs62Lo-PyxyulAyhPaGEtNCA5R-Tw78Idg0RBKsK&p=882a9645d7980af407b7c7710f4894&newp=9c678b16d9c107ff57ee947f5205a5231610db2151d4d7146b82c825d7331b001c3bbfb42220…	24.5206	97.7974	Exact
CCM620	Cement	894.231	total capacity averaged to 13 sites http://cache.baiducontent.com/c?m=8rzlwk9PrFuty_24smkuA8x8iXF6PewMtF2PFBfyer5DFtJ8pGHPPjGIXAdeK6Tf4Rs_h2RXroB-jPo81X8_dvjwq0ZFQQPM1EVtZXjyRWq5MGK27rj8FOLKPvDO69Ex_TF0HdNhpaTUK5w-eDiEfRAykAezVxti8rzH36dgJVm-FgLs62Lo-PyxyulAyhPaGEtNCA5R-Tw78Idg0RBKsK&p=882a9645d7980af407b7c7710f4894&newp=9c678b16d9c107ff57ee947f5205a5231610db2151d4d7146b82c825d7331b001c3bbfb42220…	24.696	102.181	Exact
CCM621	Cement	894.231	total capacity averaged to 13 sites http://cache.baiducontent.com/c?m=8rzlwk9PrFuty_24smkuA8x8iXF6PewMtF2PFBfyer5DFtJ8pGHPPjGIXAdeK6Tf4Rs_h2RXroB-jPo81X8_dvjwq0ZFQQPM1EVtZXjyRWq5MGK27rj8FOLKPvDO69Ex_TF0HdNhpaTUK5w-eDiEfRAykAezVxti8rzH36dgJVm-FgLs62Lo-PyxyulAyhPaGEtNCA5R-Tw78Idg0RBKsK&p=882a9645d7980af407b7c7710f4894&newp=9c678b16d9c107ff57ee947f5205a5231610db2151d4d7146b82c825d7331b001c3bbfb42220…	24.1526	102.459	Approximate
CCM622	Cement	894.231	total capacity averaged to 13 sites http://cache.baiducontent.com/c?m=8rzlwk9PrFuty_24smkuA8x8iXF6PewMtF2PFBfyer5DFtJ8pGHPPjGIXAdeK6Tf4Rs_h2RXroB-jPo81X8_dvjwq0ZFQQPM1EVtZXjyRWq5MGK27rj8FOLKPvDO69Ex_TF0HdNhpaTUK5w-eDiEfRAykAezVxti8rzH36dgJVm-FgLs62Lo-PyxyulAyhPaGEtNCA5R-Tw78Idg0RBKsK&p=882a9645d7980af407b7c7710f4894&newp=9c678b16d9c107ff57ee947f5205a5231610db2151d4d7146b82c825d7331b001c3bbfb42220…	27.8235	99.7184	Exact
CCM623	Cement	894.231	total capacity averaged to 13 sites http://cache.baiducontent.com/c?m=8rzlwk9PrFuty_24smkuA8x8iXF6PewMtF2PFBfyer5DFtJ8pGHPPjGIXAdeK6Tf4Rs_h2RXroB-jPo81X8_dvjwq0ZFQQPM1EVtZXjyRWq5MGK27rj8FOLKPvDO69Ex_TF0HdNhpaTUK5w-eDiEfRAykAezVxti8rzH36dgJVm-FgLs62Lo-PyxyulAyhPaGEtNCA5R-Tw78Idg0RBKsK&p=882a9645d7980af407b7c7710f4894&newp=9c678b16d9c107ff57ee947f5205a5231610db2151d4d7146b82c825d7331b001c3bbfb42220…	25.8313	100.6	Exact
CCM624	Cement	894.231	total capacity averaged to 13 sites http://cache.baiducontent.com/c?m=8rzlwk9PrFuty_24smkuA8x8iXF6PewMtF2PFBfyer5DFtJ8pGHPPjGIXAdeK6Tf4Rs_h2RXroB-jPo81X8_dvjwq0ZFQQPM1EVtZXjyRWq5MGK27rj8FOLKPvDO69Ex_TF0HdNhpaTUK5w-eDiEfRAykAezVxti8rzH36dgJVm-FgLs62Lo-PyxyulAyhPaGEtNCA5R-Tw78Idg0RBKsK&p=882a9645d7980af407b7c7710f4894&newp=9c678b16d9c107ff57ee947f5205a5231610db2151d4d7146b82c825d7331b001c3bbfb42220…	25.0551	101.561	Exact
CCM625	Cement	894.231	total capacity averaged to 13 sites http://cache.baiducontent.com/c?m=8rzlwk9PrFuty_24smkuA8x8iXF6PewMtF2PFBfyer5DFtJ8pGHPPjGIXAdeK6Tf4Rs_h2RXroB-jPo81X8_dvjwq0ZFQQPM1EVtZXjyRWq5MGK27rj8FOLKPvDO69Ex_TF0HdNhpaTUK5w-eDiEfRAykAezVxti8rzH36dgJVm-FgLs62Lo-PyxyulAyhPaGEtNCA5R-Tw78Idg0RBKsK&p=882a9645d7980af407b7c7710f4894&newp=9c678b16d9c107ff57ee947f5205a5231610db2151d4d7146b82c825d7331b001c3bbfb42220…	27.9124	103.913	Approximate
CCM626	Cement	894.231	total capacity averaged to 13 sites http://cache.baiducontent.com/c?m=8rzlwk9PrFuty_24smkuA8x8iXF6PewMtF2PFBfyer5DFtJ8pGHPPjGIXAdeK6Tf4Rs_h2RXroB-jPo81X8_dvjwq0ZFQQPM1EVtZXjyRWq5MGK27rj8FOLKPvDO69Ex_TF0HdNhpaTUK5w-eDiEfRAykAezVxti8rzH36dgJVm-FgLs62Lo-PyxyulAyhPaGEtNCA5R-Tw78Idg0RBKsK&p=882a9645d7980af407b7c7710f4894&newp=9c678b16d9c107ff57ee947f5205a5231610db2151d4d7146b82c825d7331b001c3bbfb42220…	24.0032	101.115	Approximate
CCM627	Cement	894.231	total capacity averaged to 13 sites http://cache.baiducontent.com/c?m=8rzlwk9PrFuty_24smkuA8x8iXF6PewMtF2PFBfyer5DFtJ8pGHPPjGIXAdeK6Tf4Rs_h2RXroB-jPo81X8_dvjwq0ZFQQPM1EVtZXjyRWq5MGK27rj8FOLKPvDO69Ex_TF0HdNhpaTUK5w-eDiEfRAykAezVxti8rzH36dgJVm-FgLs62Lo-PyxyulAyhPaGEtNCA5R-Tw78Idg0RBKsK&p=882a9645d7980af407b7c7710f4894&newp=9c678b16d9c107ff57ee947f5205a5231610db2151d4d7146b82c825d7331b001c3bbfb42220…	25.1131	99.1613	Approximate
CCM628	Cement	894.231	total capacity averaged to 13 sites http://cache.baiducontent.com/c?m=8rzlwk9PrFuty_24smkuA8x8iXF6PewMtF2PFBfyer5DFtJ8pGHPPjGIXAdeK6Tf4Rs_h2RXroB-jPo81X8_dvjwq0ZFQQPM1EVtZXjyRWq5MGK27rj8FOLKPvDO69Ex_TF0HdNhpaTUK5w-eDiEfRAykAezVxti8rzH36dgJVm-FgLs62Lo-PyxyulAyhPaGEtNCA5R-Tw78Idg0RBKsK&p=882a9645d7980af407b7c7710f4894&newp=9c678b16d9c107ff57ee947f5205a5231610db2151d4d7146b82c825d7331b001c3bbfb42220…	24.9218	99.0774	Exact
CCM629	Cement	894.231	total capacity averaged to 13 sites http://cache.baiducontent.com/c?m=8rzlwk9PrFuty_24smkuA8x8iXF6PewMtF2PFBfyer5DFtJ8pGHPPjGIXAdeK6Tf4Rs_h2RXroB-jPo81X8_dvjwq0ZFQQPM1EVtZXjyRWq5MGK27rj8FOLKPvDO69Ex_TF0HdNhpaTUK5w-eDiEfRAykAezVxti8rzH36dgJVm-FgLs62Lo-PyxyulAyhPaGEtNCA5R-Tw78Idg0RBKsK&p=882a9645d7980af407b7c7710f4894&newp=9c678b16d9c107ff57ee947f5205a5231610db2151d4d7146b82c825d7331b001c3bbfb42220…	27.7199	98.6883	Exact
CCM630	Cement	3410	https://www.ccement.com/project/paihang2021/	25.9399	105.597	Exact
CCM631	Cement	8066.2	https://www.ccement.com/project/paihang2021/	24.3674	109.263	Exact
CCM632	Cement	8525	https://www.ccement.com/project/paihang2021/	29.8328	107.617	Exact
CCM633	Cement	2015	https://www.ccement.com/project/paihang2021/	40.3145	110.045	Approximate
CCM634	Cement	2790	http://www.jinglan.cn/	30.9685	113.236	Approximate
CCM635	Cement	1240	http://www.jinglan.cn/	30.8403	113.101	Approximate
CCM636	Cement	1550	http://www.jinglan.cn/	39.3504	115.498	Approximate
CCM637	Cement	1550	http://www.jinglan.cn/	35.7577	104.142	Exact
CCM638	Cement	3100	http://www.qcuc.cn/html/productlist/list-7-1.html	34.5231	117.499	Exact
CCM639	Cement	3100	http://www.qcuc.cn/html/productlist/list-7-1.html	34.6874	117.53	Exact
CCM640	Cement	1550	http://www.qcuc.cn/html/productlist/list-7-1.html	34.8181	117.623	Approximate
CCM641	Cement	1550	http://www.qcuc.cn/html/productlist/list-7-1.html	34.9293	117.53	Exact
CCM642	Cement	9300	https://www.ccement.com/project/paihang2021/	26.0345	117.161	Exact
CCM643	Cement	9176	https://www.ccement.com/project/paihang2021/	29.5818	103.517	Exact
CCM644	Cement	9145	https://www.ccement.com/project/paihang2021/	19.2369	109.018	Exact
CCM645	Cement	2170	https://www.ccement.com/project/paihang2021/	39.4773	107.02	Exact
CCM646	Cement	3100	https://www.ccement.com/project/paihang2021/	39.9061	106.784	Exact
CCM647	Cement	1550	https://www.ccement.com/project/paihang2021/	40.0148	112.053	Approximate
CCM648	Cement	3100	https://www.ccement.com/project/paihang2021/	48.1269	123.46	Approximate
CCM649	Cement	1085	https://www.ccement.com/project/paihang2021/	49.2631	119.868	Exact
CCM650	Cement	465	https://www.ccement.com/project/paihang2021/	48.9181	121.234	Approximate
CCM651	Cement	8060	https://www.ccement.com/project/paihang2021/	42.7889	124.163	Approximate
CCM652	Cement	2480	https://www.ccement.com/project/paihang2021/	38.0911	114.065	Approximate
CCM653	Cement	1240	https://www.ccement.com/project/paihang2021/	38.1719	114.219	Exact
CCM654	Cement	4340	https://www.ccement.com/project/paihang2021/	38.1383	114.331	Exact
CCM655	Cement	3565	https://www.ccement.com/zhuanti/2016paihang/	42.4465	121.27	Exact
CCM656	Cement	1550	https://www.ccement.com/zhuanti/2016paihang/	35.9896	94.8277	Exact
CCM657	Cement	2790	https://www.ccement.com/zhuanti/2016paihang/	36.6123	101.879	Exact
CCM658	Cement	1550	https://www.ccement.com/zhuanti/2016paihang/	29.1458	119.568	Exact
CCM659	Cement	1550	https://www.ccement.com/zhuanti/2016paihang/	23.8136	114.761	Exact
CCM660	Cement	7440	https://www.ccement.com/project/paihang2021/	23.6107	114.206	Exact
CCM661	Cement	1550	https://www.ccement.com/project/paihang2021/	34.6548	108.777	Exact
CCM662	Cement	5400	https://www.ccement.com/project/paihang2021/	35.0491	109.059	Exact
CCM663	Cement	620	https://www.ccement.com/project/paihang2021/	33.9514	106.623	Exact
CCM664	Cement	3720	https://www.ccement.com/project/paihang2021/	26.3303	106.682	Exact
CCM665	Cement	775	https://www.ccement.com/project/paihang2021/	25.4394	114.844	Exact
CCM666	Cement	1240	https://www.ccement.com/project/paihang2021/	29.0184	118.941	Exact
CCM667	Cement	1395	https://www.ccement.com/project/paihang2021/	36.9819	105.914	Approximate
CCM668	Cement	6975	https://www.ccement.com/project/paihang2021/	32.7683	117.306	Exact
CCM669	Cement	6789	https://www.ccement.com/project/paihang2021/	29.6173	104.754	Exact
CCM670	Cement	6200	https://www.ccement.com/project/paihang2021/	36.0536	113.906	Exact
CCM671	Cement	5000	https://www.ccement.com/project/paihang2021/	32.7819	120.362	Exact
CCM672	Cement	1550	https://www.ccement.com/project/paihang2021/	31.716	119.366	Exact
CCM673	Cement	4650	https://www.ccement.com/project/paihang2021/	31.9652	118.344	Exact
CCM674	Cement	3150	https://www.ccement.com/zhuanti/2016paihang/	26.7792	117.473	Exact
CCM675	Cement	1395	http://www.jinniucement.com	26.2607	117.446	Exact
CCM676	Cement	1395	http://www.jinniucement.com	25.9912	117.744	Exact
CCM677	Cement	5735	https://www.ccement.com/project/paihang2021/	23.7059	108.02	Exact
CCM678	Cement	5115	https://www.ccement.com/project/paihang2021/	25.0503	117.079	Exact
CCM679	Cement	4805	https://www.ccement.com/project/paihang2021/	31.0371	103.658	Exact
CCM680	Cement	4805	https://www.ccement.com/project/paihang2021/	34.4066	114.807	Exact
CCM681	Cement	4805	https://www.ccement.com/project/paihang2021/	44.2928	86.0097	Exact
CCM682	Cement	4805	https://www.ccement.com/project/paihang2021/	24.9508	117.109	Exact
CCM683	Cement	1550	https://www.ccement.com/project/paihang2021/	28.1004	113.335	Exact
CCM684	Cement	3100	https://www.ccement.com/project/paihang2021/	27.9219	113.888	Exact
CCM685	Cement	2945	https://www.ccement.com/project/paihang2021/	32.9629	111.885	Exact
CCM686	Cement	1550	https://www.ccement.com/project/paihang2021/	32.3218	111.446	Exact
CCM687	Cement	3472	https://www.ccement.com/project/paihang2021/	37.424	105.661	Exact
CCM688	Cement	4030	https://www.ccement.com/project/paihang2021/	36.6734	114.107	Exact
CCM689	Cement	2945	https://www.ccement.com/project/paihang2021/	30.2643	114.865	Exact
CCM690	Cement	3875	https://www.ccement.com/project/paihang2021/	37.5011	112.041	Exact
CCM691	Cement	3875	https://www.ccement.com/project/paihang2021/	35.2684	118.501	Exact
CCM692	Cement	2790	https://www.ccement.com/project/paihang2021/	34.7286	111.408	Exact
CCM693	Cement	3720	https://www.ccement.com/project/paihang2021/	32.1485	119.327	Exact
CCM694	Cement	2325	https://www.ccement.com/project/paihang2021/	23.0737	112.011	Exact
CCM695	Cement	3720	https://www.ccement.com/project/paihang2021/	31.066	97.2074	Exact
CCM696	Cement	2387	https://www.ccement.com/project/paihang2021/	29.0987	119.653	Exact
CCM697	Cement	1240	https://www.ccement.com/project/paihang2021/	30.1598	114.785	Exact
CCM698	Cement	3565	https://www.ccement.com/project/paihang2021/	31.2941	117.943	Exact
CCM699	Cement	3410	https://www.ccement.com/project/paihang2021/	40.0089	111.204	Exact
CCM700	Cement	3410	https://www.ccement.com/project/paihang2021/	34.521	117.397	Exact
CCM701	Cement	3100	https://www.ccement.com/project/paihang2021/	24.054	114.209	Exact
CCM702	Cement	3100	https://www.ccement.com/project/paihang2021/	24.5236	116.146	Exact
CCM703	Cement	3100	https://www.ccement.com/project/paihang2021/	23.5531	107.114	Exact
CCM704	Cement	3100	https://www.ccement.com/project/paihang2021/	23.0991	107.147	Exact
CCM705	Cement	3100	https://www.ccement.com/project/paihang2021/	33.7643	112.951	Exact
CCM706	Cement	3100	https://www.ccement.com/project/paihang2021/	35.3138	113.346	Exact
CCM707	Cement	3100	https://www.ccement.com/project/paihang2021/	35.4324	114.04	Exact
CCM708	Cement	3100	https://www.ccement.com/project/paihang2021/	44.8654	82.0847	Exact
CCM709	Cement	1550	https://www.ccement.com/project/paihang2021/	32.0202	118.599	Exact
CCM710	Cement	2976	https://www.ccement.com/project/paihang2021/	39.8195	106.849	Approximate
CCM711	Cement	2945	https://www.ccement.com/project/paihang2021/	27.188	103.555	Exact
CCM712	Cement	2945	https://www.ccement.com/project/paihang2021/	40.0122	116.841	Approximate
CCM713	Cement	2790	https://www.ccement.com/project/paihang2021/	41.5378	123.389	Exact
CCM714	Cement	2790	https://www.ccement.com/project/paihang2021/	35.7136	117.945	Approximate
CCM715	Cement	2790	https://www.ccement.com/project/paihang2021/	34.8167	109.05	Exact
CCM716	Cement	2790	https://www.ccement.com/project/paihang2021/	24.551	116.161	Exact
CCM717	Cement	2790	https://www.ccement.com/project/paihang2021/	22.7287	110.378	Approximate
CCM718	Cement	2635	https://www.ccement.com/project/paihang2021/	43.9584	90.0198	Exact
CCM719	Cement	2542	https://www.ccement.com/project/paihang2021/	28.9364	106.879	Exact
CCM720	Cement	2480	https://www.ccement.com/project/paihang2021/	24.1543	102.927	Exact
CCM721	Cement	930	https://www.ccement.com/project/paihang2021/	34.2001	107.771	Exact
CCM722	Cement	2325	https://www.ccement.com/project/paihang2021/	37.6951	120.59	Exact
CCM723	Cement	2325	https://www.ccement.com/project/paihang2021/	26.0071	117.32	Exact
CCM724	Cement	2325	https://www.ccement.com/project/paihang2021/	28.6854	118.556	Exact
CCM725	Cement	2325	https://www.ccement.com/project/paihang2021/	35.7876	104.292	Exact
CCM726	Cement	2325	https://www.ccement.com/project/paihang2021/	24.4543	116.123	Exact
CCM727	Cement	2325	https://www.ccement.com/project/paihang2021/	36.7392	118.107	Exact
CCM728	Cement	2201	https://www.ccement.com/project/paihang2021/	36.5473	101.521	Approximate
CCM729	Cement	2170	https://www.ccement.com/project/paihang2021/	31.6403	117.872	Exact
CCM730	Cement	2170	https://www.ccement.com/project/paihang2021/	36.7004	118.092	Exact
CCM731	Cement	2170	https://www.ccement.com/project/paihang2021/	26.0162	117.336	Exact
CCM732	Cement	1550	https://www.ccement.com/project/paihang2021/	32.3512	109.427	Exact
CCM733	Cement	1860	https://www.ccement.com/project/paihang2021/	25.5983	100.277	Exact
CCM734	Cement	1860	https://www.ccement.com/project/paihang2021/	38.9637	121.578	Exact
CCM735	Cement	1860	https://www.ccement.com/project/paihang2021/	25.8235	105.222	Exact
CCM736	Cement	1860	https://www.ccement.com/project/paihang2021/	41.2848	123.19	Exact
CCM737	Cement	1860	https://www.ccement.com/project/paihang2021/	36.1576	116.642	Exact
CCM738	Cement	1860	https://www.ccement.com/project/paihang2021/	36.1469	117.756	Exact
CCM739	Cement	1860	https://www.ccement.com/project/paihang2021/	38.7415	110.192	Exact
CCM740	Cement	1860	https://www.ccement.com/project/paihang2021/	35.1475	111.075	Exact
CCM741	Cement	1767	https://www.ccement.com/project/paihang2021/	33.3016	112.978	Exact
CCM742	Cement	1767	https://www.ccement.com/project/paihang2021/	26.9718	112.635	Exact
CCM743	Cement	1705	https://www.ccement.com/project/paihang2021/	23.081	112.161	Exact
CCM744	Cement	1674	https://www.ccement.com/project/paihang2021/	29.3587	106.421	Exact
CCM745	Cement	1612	https://www.ccement.com/project/paihang2021/	35.9595	118.988	Exact
CCM746	Cement	1550	https://www.ccement.com/project/paihang2021/	29.9478	106.317	Exact
CCM747	Cement	1240	https://www.ccement.com/project/paihang2021/	46.7078	131.165	Exact
CCM748	Cement	775	https://www.ccement.com/project/paihang2021/	45.3034	127.28	Exact
CCM749	Cement	775	https://www.ccement.com/project/paihang2021/	47.3153	130.263	Exact
CCM750	Cement	775	https://www.ccement.com/project/paihang2021/	45.3481	130.964	Exact
CCM751	Cement	372	https://www.ccement.com/project/paihang2021/	46.4562	127.111	Exact
CCM752	Cement	310	https://www.ccement.com/project/paihang2021/	43.9094	129.321	Exact
CCM753	Cement	1240	https://www.ccement.com/project/paihang2021/	43.3527	124.582	Approximate
CCM754	Cement	775	https://www.ccement.com/project/paihang2021/	41.7997	126.893	Exact
CCM755	Cement	361.77	https://www.ccement.com/project/paihang2021/	44.1661	125.931	Exact
CCM756	Cement	2325	https://www.ccement.com/project/paihang2021/	41.9179	124.097	Exact
CCM757	Cement	1550	https://www.ccement.com/project/paihang2021/	40.0828	119.606	Exact
CCM758	Cement	1550	https://www.ccement.com/project/paihang2021/	39.7545	118.465	Exact
CCM759	Cement	1550	https://www.ccement.com/project/paihang2021/	39.8405	113.019	Exact
CCM760	Cement	1550	https://www.ccement.com/project/paihang2021/	34.9435	109.02	Exact
CCM761	Cement	1550	https://www.ccement.com/project/paihang2021/	37.5188	105.206	Exact
CCM762	Cement	1395	https://www.ccement.com/project/paihang2021/	37.5579	105.689	Exact
CCM763	Cement	1240	https://www.ccement.com/project/paihang2021/	37.9103	105.975	Exact
CCM764	Cement	775	https://www.ccement.com/project/paihang2021/	38.9393	106.516	Approximate
CCM765	Cement	775	https://www.ccement.com/project/paihang2021/	37.9115	105.973	Exact
CCM766	Cement	1550	https://www.ccement.com/project/paihang2021/	44.3299	87.7052	Exact
CCM767	Cement	1550	https://www.ccement.com/project/paihang2021/	42.8278	87.9393	Exact
CCM768	Cement	1550	https://www.ccement.com/project/paihang2021/	37.3491	97.4097	Exact
CCM769	Cement	1550	https://www.ccement.com/project/paihang2021/	36.4919	102.274	Exact
CCM770	Cement	930	https://www.ccement.com/project/paihang2021/	36.9112	101.746	Exact
CCM771	Cement	775	https://www.ccement.com/project/paihang2021/	36.294	100.63	Exact
CCM772	Cement	620	https://www.ccement.com/project/paihang2021/	36.9039	101.741	Exact
CCM773	Cement	310	https://www.ccement.com/project/paihang2021/	36.4851	102.257	Exact
CCM774	Cement	620	https://www.ccement.com/project/paihang2021/	29.7404	98.7205	Exact
CCM775	Cement	1550	https://www.ccement.com/project/paihang2021/	39.5923	94.3091	Exact
CCM776	Cement	1395	https://www.ccement.com/project/paihang2021/	36.57	104.191	Exact
CCM777	Cement	1085	https://www.ccement.com/project/paihang2021/	38.5201	102.305	Exact
CCM778	Cement	1550	https://www.ccement.com/project/paihang2021/	29.2962	108.171	Exact
CCM779	Cement	1550	https://www.ccement.com/project/paihang2021/	26.3252	105.857	Exact
CCM780	Cement	1550	https://www.ccement.com/project/paihang2021/	29.9078	115.391	Exact
CCM781	Cement	1240	https://www.ccement.com/project/paihang2021/	30.0487	114.927	Exact
CCM782	Cement	1550	https://www.ccement.com/project/paihang2021/	29.6093	115.863	Exact
CCM783	Cement	775	https://www.ccement.com/project/paihang2021/	29.7699	120.299	Exact
CCM784	Cement	775	https://www.ccement.com/project/paihang2021/	29.0552	119.295	Exact
